# Supplementary material for: KI-mediated three-component annelation for the regioselective synthesis of angular azolo[1,5-a]pyrimidine derivatives
Source: Royal Society of Chemistry journal article supplement (doi:10.1039/d3nj03930g), 2023-01-01

## *Supporting Information*

### **KI-Mediated Three-Component Annulation for the Regioselective Synthesis of Angular Azolo[1,5-*a*]pyrimidine Derivatives**

Yimei Guo,<sup>a</sup> Zhenhua Sun,<sup>a</sup> Xiaodan He,<sup>\*b</sup> Penghui Cao,<sup>a</sup> Guangping Fan<sup>a</sup> and Qinghe Gao<sup>\*a</sup>

<sup>a</sup> School of Pharmacy, Xinxiang Medical University, Xinxiang, Henan 453003, P. R. China.  
E-mail: gao\_qinghe@xxmu.edu.cn

<sup>b</sup> The Second Affiliated Hospital of Xinxiang Medical University, Xinxiang, Henan 453002, P. R. China.  
E-mail: hxd910318@163.com

| <b>Table of Contents</b>                                             | <b>page</b> |
|----------------------------------------------------------------------|-------------|
| 1. General.....                                                      | S2          |
| 2. General procedure for the synthesis of compounds <b>4</b> .....   | S2          |
| 3. Experimental details.....                                         | S2-S3       |
| 4. Studying the reaction mechanism.....                              | S3-S4       |
| 5. Characterization data for compounds.....                          | S5-S28      |
| 6. Crystallographic data and molecular structure of <b>4am</b> ..... | S29         |
| 7. NMR spectra .....                                                 | S30-S93     |

## 1. General

All substrates aldehydes (**1**), 3(5)-aminoazoles (**2**), cycloketones (**3**) and reagents were commercially available and used without further purification. All aldehydes (**1**) and 3(5)-aminoazoles are known compounds. TLC analysis was performed using pre-coated glass plates. Column chromatography was performed using silica gel (200–300 mesh). <sup>1</sup>H spectra were recorded in CDCl<sub>3</sub> on 400 MHz NMR spectrometers and resonances ( $\delta$ ) are given in parts per million relative to tetramethylsilane. Data are reported as follows: chemical shift, multiplicity (s = singlet, d = doublet, t = triplet, m = multiplet), coupling constants (Hz) and integration. <sup>13</sup>C spectra were recorded in CDCl<sub>3</sub> on 100 MHz NMR spectrometers and resonances ( $\delta$ ) are given in ppm. HRMS analysis of compounds was performed with a time-of-flight mass spectrometer (micrOTOF-Q, Bruker Daltonik, Germany) equipped with an electrospray ionization source. The X-ray crystal-structure determinations of **4am** were obtained on a Bruker SMART APEX CCD system. Melting points were determined using XT-4 apparatus and not corrected. All reactions were heated by a metal sand bath (WATTCAS, LAB-500, <https://www.wattcas.com>).

## 2. General procedure for the synthesis of compounds 4 (4a as an example)

Benzaldehyde **1a** (53 mg, 0.5 mmol), ethyl 3-amino-1*H*-pyrazole-4-carboxylate **2a** (77.6 mg, 0.5 mmol), cyclohexanone **3a** (147.2 mg, 1.5 mmol), KI (41.5mg, 0.25 mmol), DMSO (39 mg, 0.5 mmol) and 1,2-dichloroethane (2.5 mL) were charged into a pressure tube (35 mL) and were stirred at 120 °C for 5 h. After disappearance of the reactant (monitored by TLC), added 50 mL water to the mixture, then extracted with EtOAc 3 times (3 × 50 mL). The extract was washed with 10% Na<sub>2</sub>S<sub>2</sub>O<sub>3</sub> solution (w/w), dried over anhydrous Na<sub>2</sub>SO<sub>4</sub> and evaporation. The residue was purified by column chromatography on silica gel (petroleum ether/EtOAc = 5:1) to afford the product **4a** as a light yellow solid (157 mg, 98% yield).

## 3. Experimental details

(1)The methodology applicable for gram-scale synthesis (**4a** as an example)

Benzaldehyde **1a** (530 mg, 5 mmol), ethyl 3-amino-1*H*-pyrazole-4-carboxylate **2a** (776 mg, 5 mmol), cyclohexanone **3a** (1472 mg, 15 mmol), KI (415mg, 2.5 mmol), DMSO (390 mg, 5 mmol) and 1,2-dichloroethane (25 mL) were charged into a pressure tube (150 mL) and were stirred at 120 °C for 96 h. After disappearance of the reactant (monitored by TLC), and added 500 mL water to the mixture, then extracted with EtOAc 3 times (3 × 500 mL). The extract was washed with 10% Na<sub>2</sub>S<sub>2</sub>O<sub>3</sub> solution (w/w), dried over anhydrous Na<sub>2</sub>SO<sub>4</sub> and evaporation. The residue was purified by column chromatography on silica gel

(petroleum ether/EtOAc = 5:1) to afford the product **4a** as a light yellow solid (1.46 g, 91% yield).

(2) The methodology applicable for **5**: (Scheme 4b)

Ethyl 5-phenyl-6,7,8,9-tetrahydropyrazolo[1,5-*a*]quinazoline-3-carboxylate **4a** (321.4 mg, 1.0 mmol) and THF (4 mL) were charged into a pressure tube (15.0 mL). The mixture was stirred at room temperature, then added LiOH (120 mg, 5.0 mmol) in water (4 mL) and stirred at same temperature for 12 h. Water was added and the solution was acidified with 6 M aqueous HCl to get precipitation, filtration and drying afforded ethyl 5-phenyl-6,7,8,9-tetrahydropyrazolo[1,5-*a*]quinazoline-3-carboxylate acid as a yellow solid (275.7 mg, 94% yield). Then, the acid (58.7 mg, 0.2 mmol), estrone (54.1 mg, 0.2 mmol), 1-(3-dimethylaminopropyl)-3-ethylcarbodiimide hydrochloride (42.2 mg, 1.1 mmol), N,N-dimethyl-4-aminopyridine (6.1 mg, 0.25 mmol) and CH<sub>2</sub>Cl<sub>2</sub> (2 mL) were charged into a round-bottom flask (50 mL). After stirred at room temperature for 8 h, the reaction was quenched with 20 mL of saturated NaHCO<sub>3</sub> (aq.) and then extracted with CH<sub>2</sub>Cl<sub>2</sub> (10 mL × 3). The combined organic layer was dried over Na<sub>2</sub>SO<sub>4</sub>, filtrated, and concentrated under reduced pressure. The residue was purified by chromatography on silica gel (petroleum ether/EtOAc = 2:1) to afford the product **5** as a white solid (91 mg, 83% yield).

#### 4. Studying the reaction mechanism

(1) The details of Scheme 5c

Benzaldehyde **1a** (530 mg, 5 mmol) and ethyl 3-amino-1*H*-pyrazole-4-carboxylate **2a** (776 mg, 5 mmol) were charged into a pressure tube (150 mL) and were stirred at 120 °C for 2 h. The imine intermediate **A** was clearly detected by HRMS. HRMS (ESI): *m/z* [M + H]<sup>+</sup> calcd for C<sub>13</sub>H<sub>14</sub>N<sub>3</sub>O<sub>2</sub>: 244.1081; found: 244.1082, *m/z* [M + Na]<sup>+</sup> calcd for C<sub>13</sub>H<sub>14</sub>N<sub>3</sub>NaO<sub>2</sub>: 266.0900; found: 266.0905. Then, KI (41.5mg, 0.25 mmol), DMSO (390 mg, 5 mmol) and **3a** were added into the pressure tube, afterward, the mixture was stirred at 120 °C for 46 h. After disappearance of the reactant (monitored by TLC), and added 50 mL water to the mixture, then extracted with EtOAc 3 times (3 × 50 mL). The extract was washed with 10% Na<sub>2</sub>S<sub>2</sub>O<sub>3</sub> solution (w/w), dried over anhydrous Na<sub>2</sub>SO<sub>4</sub> and evaporation. The residue was purified by column chromatography on silica gel (petroleum ether/EtOAc = 5:1) to afford the product **4a** as a light yellow solid (151 mg, 94% yield).

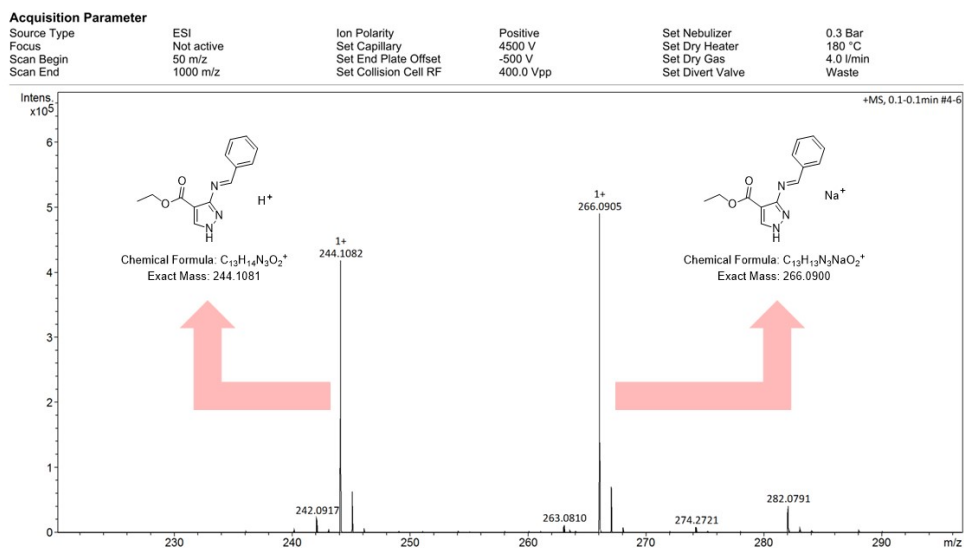

## (2) The details of intermediate C

Benzaldehyde **1a** (53 mg, 0.5 mmol), ethyl 3-amino-1*H*-pyrazole-4-carboxylate **2a** (77.6 mg, 0.5 mmol), cyclohexanone **3a** (147.2 mg, 1.5 mmol), KI (8.3 mg, 0.05 mmol), DMSO (39 mg, 0.5 mmol) and 1,2-dichloroethane (2.5 mL) were charged into a pressure tube (35 mL) and were stirred at 120 °C for 5 h. The imine intermediate **C** was clearly detected by HRMS. HRMS (ESI):  $m/z$   $[M + H]^+$  + calcd for  $C_{19}H_{22}N_3O_2$ : 324.1707; found: 324.1703.

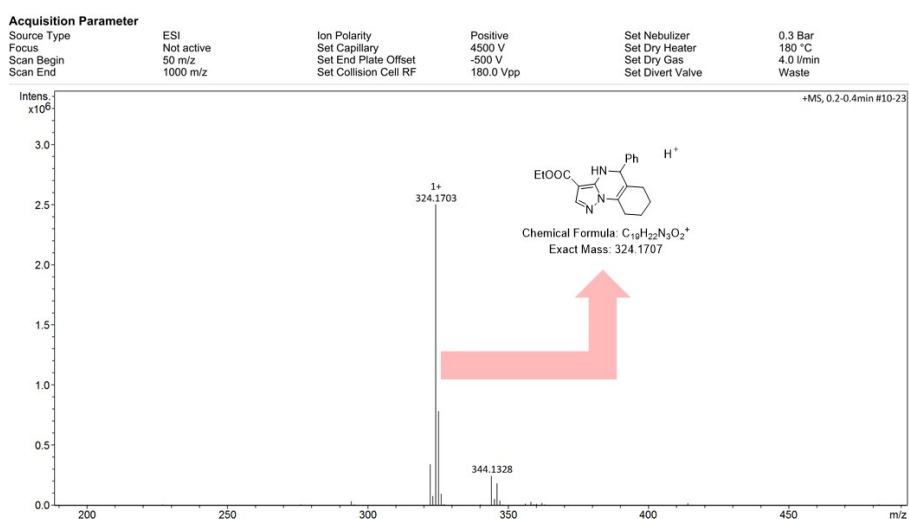



## 5. Characterization data for compounds

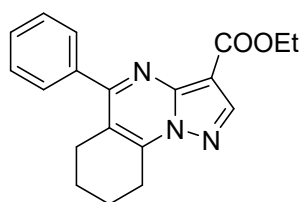

### ethyl 5-phenyl-6,7,8,9-tetrahydropyrazolo[1,5-a]quinazoline-3-carboxylate (4a):

Yield 98% (157.4 mg; petroleum ether/EtOAc = 15:1); light yellow solid; mp 131–133 °C; <sup>1</sup>H NMR (400 MHz, CDCl<sub>3</sub>): δ (ppm) 8.53 (s, 1H), 7.69–7.64 (m, 2H), 7.48–7.43 (m, 3H), 4.39 (q, *J* = 7.2 Hz, 2H), 3.25 (t, *J* = 6.4 Hz, 2H), 2.79 (t, *J* = 5.6 Hz, 2H), 2.08–2.01 (m, 2H), 1.83–1.77 (m, 2H), 1.40 (t, *J* = 7.2 Hz, 3H); <sup>13</sup>C NMR (100 MHz, CDCl<sub>3</sub>): δ (ppm) 162.7, 161.7, 146.6, 145.8, 145.6, 138.2, 129.2, 129.0, 128.0, 117.5, 102.6, 59.9, 26.7, 24.7, 22.2, 20.8, 14.4; HRMS (ESI): *m/z* [M + H]<sup>+</sup> calcd for C<sub>19</sub>H<sub>20</sub>N<sub>3</sub>O<sub>2</sub>: 322.1550; found: 322.1549.

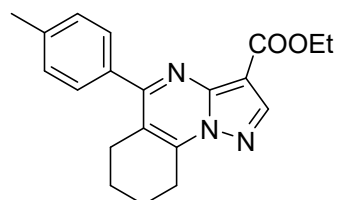

### ethyl 5-(*p*-tolyl)-6,7,8,9-tetrahydropyrazolo[1,5-a]quinazoline-3-carboxylate (4b):

Yield 99% (166 mg; petroleum ether/EtOAc = 8:1); yellow solid; mp 140–142 °C; <sup>1</sup>H NMR (400 MHz, CDCl<sub>3</sub>): δ (ppm) 8.53 (s, 1H), 7.59 (d, *J* = 8.0 Hz, 2H), 7.29–7.26 (m, 2H), 4.40 (q, *J* = 7.2 Hz, 2H), 3.25 (t, *J* = 6.6 Hz, 2H), 2.81 (t, *J* = 5.8 Hz, 2H), 2.42 (s, 3H), 2.09–2.02 (m, 2H), 1.84–1.76 (m, 2H), 1.41 (t, *J* = 7.2 Hz, 3H); <sup>13</sup>C NMR (100 MHz, CDCl<sub>3</sub>): δ (ppm) 162.6, 161.5, 146.4, 145.7, 145.3, 139.1, 135.2, 128.9, 128.6, 117.4, 102.3, 59.7, 26.7, 24.6, 22.1, 21.1, 20.7, 14.3; HRMS (ESI): *m/z* [M + Na]<sup>+</sup> calcd for C<sub>20</sub>H<sub>21</sub>N<sub>3</sub>NaO<sub>2</sub>: 358.1526; found: 358.1527.

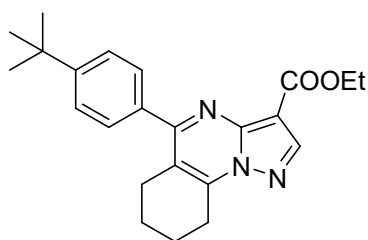

### ethyl 5-(4-(*tert*-butyl)phenyl)-6,7,8,9-tetrahydropyrazolo[1,5-a]quinazoline-3-carboxylate (4c):

Yield 98% (185 mg; petroleum ether/EtOAc = 10:1); yellow solid; mp 130–132 °C; <sup>1</sup>H NMR (400 MHz, CDCl<sub>3</sub>): δ (ppm) 8.52 (s, 1H), 7.70–7.58 (m, 2H), 7.51–7.45 (m, 2H), 4.39 (q, *J* = 7.2 Hz, 2H), 3.24 (t, *J* = 6.6 Hz, 2H), 2.84 (t, *J* = 6.0 Hz, 2H), 2.08–2.00 (m, 2H), 1.83–1.75 (m, 2H), 1.41 (t, *J* = 7.2 Hz, 3H), 1.36 (s, 9H); <sup>13</sup>C NMR (100 MHz, CDCl<sub>3</sub>): δ (ppm) 162.7, 161.7, 152.4, 146.5, 145.8, 145.4, 135.3, 128.9, 125.0, 117.5, 102.5, 59.9, 34.6, 31.1, 26.8, 24.7, 22.3, 20.9, 14.4; HRMS (ESI): *m/z* [M + H]<sup>+</sup> calcd for C<sub>23</sub>H<sub>28</sub>N<sub>3</sub>O<sub>2</sub>: 378.2176; found: 378.2175.

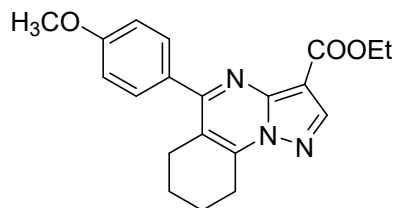

**ethyl 5-(4-methoxyphenyl)-6,7,8,9-tetrahydropyrazolo[1,5-*a*]quinazoline-3-carboxylate (4d):**

Yield 99% (174 mg; petroleum ether/EtOAc = 8:1); yellow solid; mp 142–144 °C; <sup>1</sup>H NMR (400 MHz, CDCl<sub>3</sub>): δ (ppm); 8.51 (s, 1H), 7.67 (d, *J* = 8.8 Hz, 2H), 6.97 (d, *J* = 8.8 Hz, 2H), 4.40 (q, *J* = 7.2 Hz, 2H), 3.86 (s, 3H), 3.23 (t, *J* = 6.6 Hz, 2H), 2.82 (t, *J* = 6.0 Hz, 2H), 2.08–2.00 (m, 2H), 1.84–1.75 (m, 2H), 1.41 (t, *J* = 7.2 Hz, 3H); <sup>13</sup>C NMR (100 MHz, CDCl<sub>3</sub>): δ (ppm); 162.8, 161.2, 160.5, 146.5, 145.8, 145.4, 130.8, 130.6, 117.4, 113.4, 102.3, 59.8, 55.2, 26.9, 24.8, 22.3, 20.8, 14.3. HRMS (ESI): *m/z* [M + H]<sup>+</sup> calcd for C<sub>20</sub>H<sub>22</sub>N<sub>3</sub>O<sub>3</sub>: 352.1656; found: 352.1654.

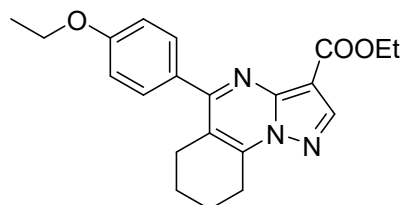

**ethyl 5-(4-ethoxyphenyl)-6,7,8,9-tetrahydropyrazolo[1,5-*a*]quinazoline-3-carboxylate (4e):**

Yield 97% (177 mg; petroleum ether/EtOAc = 8:1); yellow solid; mp 131–133 °C; <sup>1</sup>H NMR (400 MHz, CDCl<sub>3</sub>): δ (ppm) 8.51 (s, 1H), 7.69–7.64 (m, 2H), 6.98–6.93 (m, 2H), 4.39 (q, *J* = 7.2 Hz, 2H), 4.09 (q, *J* = 7.2 Hz, 2H), 3.22 (t, *J* = 6.4 Hz, 2H), 2.82 (t, *J* = 6.0 Hz, 2H), 2.07–2.00 (m, 2H), 1.82–1.75 (m, 2H), 1.47–1.39 (m, 6H); <sup>13</sup>C NMR (100 MHz, CDCl<sub>3</sub>): δ (ppm) 162.7, 161.1, 159.8, 146.4, 145.8, 145.3, 130.7, 130.4, 117.3, 113.8, 102.2, 63.3, 59.8, 26.9, 24.7, 22.3, 20.8, 14.6, 14.3; HRMS (ESI): *m/z* [M + H]<sup>+</sup> calcd for C<sub>21</sub>H<sub>24</sub>N<sub>3</sub>O<sub>3</sub>: 366.1812; found: 366.1809.

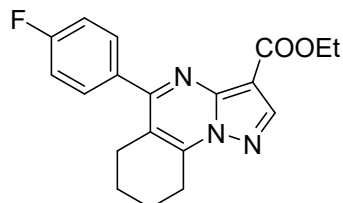

**ethyl 5-(4-fluorophenyl)-6,7,8,9-tetrahydropyrazolo[1,5-*a*]quinazoline-3-carboxylate (4f):**

Yield 97% (164.6 mg; petroleum ether/EtOAc = 8:1); yellow solid; mp 163–165 °C; <sup>1</sup>H NMR (400 MHz, CDCl<sub>3</sub>): δ (ppm) 8.53 (s, 1H), 7.71–7.66 (m, 2H), 7.18–7.12 (m, 2H), 4.39 (q, *J* = 7.2 Hz, 2H), 3.25 (t, *J* = 6.6 Hz, 2H), 2.78 (t, *J* = 5.8 Hz, 2H), 2.09–2.01 (m, 2H), 1.85–1.78 (m, 2H), 1.40 (t, *J* = 7.2 Hz, 3H); <sup>13</sup>C NMR (100 MHz, CDCl<sub>3</sub>): δ (ppm) 163.3 (d, C-F, <sup>1</sup>*J*<sub>C-F</sub> = 248.1 Hz), 162.6, 160.5, 146.6, 145.7, 134.2 (d, C-F, <sup>4</sup>*J*<sub>C-F</sub> = 3.3 Hz), 131.1 (d, C-F, <sup>3</sup>*J*<sub>C-F</sub> = 8.5

Hz), 117.3, 115.1 (d, C-F,  $^2J_{C-F} = 21.7$  Hz), 102.5, 59.9, 26.7, 24.7, 22.2, 20.7, 14.3; HRMS (ESI):  $m/z$   $[M + H]^+$  calcd for  $C_{19}H_{19}FN_3O_2$ : 340.1456; found: 340.1457.

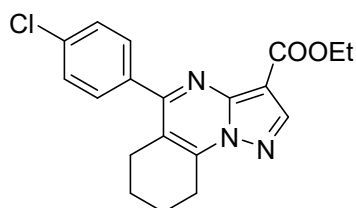

**ethyl 5-(4-chlorophenyl)-6,7,8,9-tetrahydropyrazolo[1,5-a]quinazoline-3-carboxylate (4g):**

Yield 97% (172.6 mg; petroleum ether/EtOAc = 8:1); light yellow solid; mp 160–162 °C;  $^1H$  NMR (400 MHz,  $CDCl_3$ ):  $\delta$  (ppm) 8.53 (s, 1H), 7.65–7.60 (m, 2H), 7.45–7.41 (m, 2H), 4.39 (q,  $J = 7.2$  Hz, 2H), 3.24 (t,  $J = 6.6$  Hz, 2H), 2.77 (t,  $J = 5.8$  Hz, 2H), 2.08–2.01 (m, 2H), 1.85–1.78 (m, 2H), 1.40 (t,  $J = 7.2$  Hz, 3H);  $^{13}C$  NMR (100 MHz,  $CDCl_3$ ):  $\delta$  (ppm) 162.5, 160.3, 146.6, 145.8, 145.7, 136.5, 135.3, 130.4, 128.2, 117.2, 102.6, 59.9, 26.6, 24.7, 22.1, 20.7, 14.3; HRMS (ESI):  $m/z$   $[M + H]^+$  calcd for  $C_{19}H_{19}ClN_3O_2$ : 356.1160; found: 356.1164.

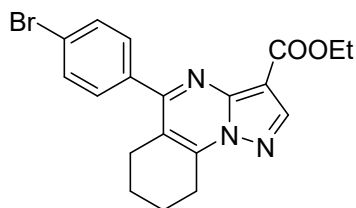

**ethyl 5-(4-bromophenyl)-6,7,8,9-tetrahydropyrazolo[1,5-a]quinazoline-3-carboxylate (4h):**

Yield 97% (194 mg; petroleum ether/EtOAc = 8:1); yellow solid; mp 171–173 °C;  $^1H$  NMR (400 MHz,  $CDCl_3$ ):  $\delta$  (ppm) 8.52 (s, 1H), 7.60–7.53 (m, 4H), 4.38 (q,  $J = 7.2$  Hz, 2H), 3.23 (t,  $J = 6.4$  Hz, 2H), 2.76 (t,  $J = 5.8$  Hz, 2H), 2.08–2.01 (m, 2H), 1.83–1.77 (m, 2H), 1.40 (t,  $J = 7.2$  Hz, 3H);  $^{13}C$  NMR (100 MHz,  $CDCl_3$ ):  $\delta$  (ppm) 162.5, 160.3, 146.6, 145.8, 145.6, 136.9, 131.1, 130.7, 123.6, 117.2, 102.5, 59.9, 26.5, 24.7, 22.1, 20.7, 14.3; HRMS (ESI):  $m/z$   $[M + H]^+$  calcd for  $C_{19}H_{19}BrN_3O_2$ : 400.0655; found: 400.0658.

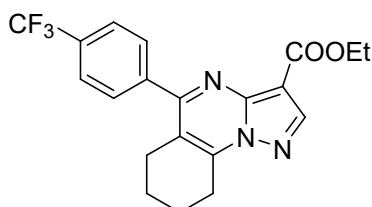

**ethyl 5-(4-(trifluoromethyl)phenyl)-6,7,8,9-tetrahydropyrazolo[1,5-a]quinazoline-3-carboxylate (4i):**

Yield 98% (190.7 mg; petroleum ether/EtOAc = 8:1); light yellow solid; mp 172–174 °C;  $^1H$  NMR (400 MHz,  $CDCl_3$ ):  $\delta$  (ppm) 8.55 (d,  $J = 0.4$  Hz, 1H), 7.80 (d,  $J = 8.0$  Hz, 2H), 7.73 (d,  $J = 8.0$  Hz, 2H), 4.39 (q,  $J = 7.2$  Hz, 2H), 3.26 (t,  $J = 6.4$  Hz, 2H), 2.76 (t,  $J = 5.8$  Hz, 2H),

2.11–2.03 (m, 2H), 1.86–1.79 (m, 2H), 1.40 (t,  $J = 7.2$  Hz, 3H);  $^{13}\text{C}$  NMR (100 MHz,  $\text{CDCl}_3$ ):  $\delta$  (ppm) 162.5, 160.1, 146.7, 146.1, 145.7, 141.6 (q, C-F,  $^4J_{\text{C-F}} = 1.1$  Hz), 131.0 (q, C-F,  $^2J_{\text{C-F}} = 32.6$  Hz), 129.4, 125.0 (q, C-F,  $^3J_{\text{C-F}} = 3.6$  Hz), 123.8 (q, C-F,  $^1J_{\text{C-F}} = 270.6$  Hz), 117.2, 102.8, 60.0, 26.4, 24.7, 22.1, 20.7, 14.3; HRMS (ESI):  $m/z$   $[\text{M} + \text{H}]^+$  calcd for  $\text{C}_{20}\text{H}_{19}\text{F}_3\text{N}_3\text{O}_2$ : 390.1424; found: 390.1419.

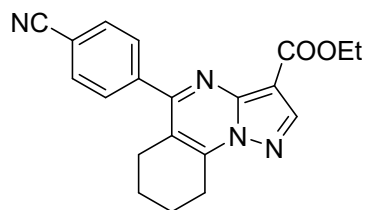

**ethyl 5-(4-cyanophenyl)-6,7,8,9-tetrahydropyrazolo[1,5-*a*]quinazoline-3-carboxylate (4j):**  
Yield 97% (168 mg; petroleum ether/EtOAc = 5:1); light yellow solid; mp 218–220 °C;  $^1\text{H}$  NMR (400 MHz,  $\text{CDCl}_3$ ):  $\delta$  (ppm) 8.56 (s, 1H), 7.82–7.76 (m, 4H), 4.39 (q,  $J = 7.2$  Hz, 2H), 3.29 (t,  $J = 6.4$  Hz, 2H), 2.76 (t,  $J = 6.0$  Hz, 2H), 2.12–2.05 (m, 2H), 1.88–1.82 (m, 2H), 1.40 (t,  $J = 7.2$  Hz, 3H);  $^{13}\text{C}$  NMR (100 MHz,  $\text{CDCl}_3$ ):  $\delta$  (ppm) 162.4, 159.4, 146.8, 146.3, 145.7, 142.5, 131.9, 129.8, 118.3, 117.1, 112.8, 103.0, 60.1, 26.4, 24.8, 22.1, 20.7, 14.3; HRMS (ESI):  $m/z$   $[\text{M} + \text{Na}]^+$  calcd for  $\text{C}_{20}\text{H}_{18}\text{N}_4\text{NaO}_2$ : 369.1322; found: 369.1319.

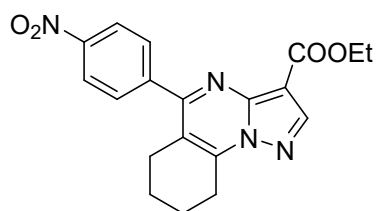

**ethyl 5-(4-nitrophenyl)-6,7,8,9-tetrahydropyrazolo[1,5-*a*]quinazoline-3-carboxylate (4k):**  
Yield 96% (175.8 mg; petroleum ether/EtOAc = 8:1); light yellow solid; mp 160–162 °C;  $^1\text{H}$  NMR (400 MHz,  $\text{CDCl}_3$ ):  $\delta$  (ppm) 8.56 (s, 1H), 8.33 (d,  $J = 8.4$  Hz, 2H), 7.90–7.84 (m, 2H), 4.40 (q,  $J = 7.2$  Hz, 2H), 3.30 (t,  $J = 6.4$  Hz, 2H), 2.77 (t,  $J = 5.8$  Hz, 2H), 2.13–2.05 (m, 2H), 1.90–1.83 (m, 2H), 1.41 (t,  $J = 7.2$  Hz, 3H);  $^{13}\text{C}$  NMR (100 MHz,  $\text{CDCl}_3$ ):  $\delta$  (ppm) 162.4, 159.1, 148.0, 146.9, 146.4, 145.7, 144.3, 130.2, 123.3, 117.1, 103.1, 60.1, 26.4, 24.8, 22.1, 20.7, 14.3; HRMS (ESI):  $m/z$   $[\text{M} + \text{Na}]^+$  calcd for  $\text{C}_{19}\text{H}_{18}\text{N}_4\text{NaO}_4$ : 389.1220; found: 389.1221.

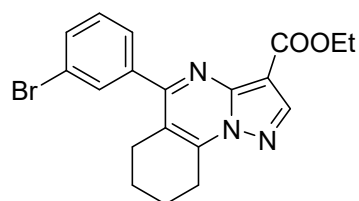

**ethyl 5-(3-bromophenyl)-6,7,8,9-tetrahydropyrazolo[1,5-*a*]quinazoline-3-carboxylate (4l):**  
Yield 97% (194 mg; petroleum ether/EtOAc = 8:1); white solid; mp 168–170 °C;  $^1\text{H}$  NMR (400 MHz,  $\text{CDCl}_3$ ):  $\delta$  (ppm) 8.54 (s, 1H), 7.82 (t,  $J = 1.6$  Hz, 1H), 7.58 (dd,  $J = 8.0, 1.6$  Hz, 2H), 7.33 (t,  $J = 8.0$  Hz, 1H), 4.40 (q,  $J = 7.2$  Hz, 2H), 3.26 (t,  $J = 6.4$  Hz, 2H), 2.76 (t,  $J = 5.8$

Hz, 2H), 2.09–2.02 (m, 2H), 1.86–1.79 (m, 2H), 1.41 (t,  $J = 7.2$  Hz, 3H);  $^{13}\text{C}$  NMR (100 MHz,  $\text{CDCl}_3$ ):  $\delta$  (ppm) 162.5, 160.0, 146.7, 145.9, 145.7, 140.1, 132.1, 131.9, 129.6, 127.6, 122.2, 117.3, 102.8, 60.0, 26.5, 24.8, 22.1, 20.7, 14.4; HRMS (ESI):  $m/z$   $[\text{M} + \text{H}]^+$  calcd for  $\text{C}_{19}\text{H}_{19}\text{BrN}_3\text{O}_2$ : 400.0655; found: 400.0653.

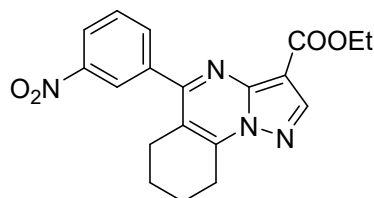

**ethyl 5-(3-nitrophenyl)-6,7,8,9-tetrahydropyrazolo[1,5-*a*]quinazoline-3-carboxylate (4m):**  
Yield 68% (126.6 mg; petroleum ether/EtOAc = 5:1); white solid; mp 190–192°C;  $^1\text{H}$  NMR (400 MHz,  $\text{CDCl}_3$ ):  $\delta$  (ppm) 8.56 (s, 1H), 8.55 (t,  $J = 2.0$  Hz, 1H), 8.35–8.28 (m, 1H), 8.09–8.04 (m, 1H), 7.69 (t,  $J = 8.0$  Hz, 1H), 4.40 (q,  $J = 7.2$  Hz, 2H), 3.29 (t,  $J = 6.6$  Hz, 2H), 2.81 (t,  $J = 6.0$  Hz, 2H), 2.13–2.06 (m, 2H), 1.89–1.83 (m, 2H), 1.42 (t,  $J = 7.2$  Hz, 3H);  $^{13}\text{C}$  NMR (100 MHz,  $\text{CDCl}_3$ ):  $\delta$  (ppm) 162.4, 158.7, 147.8, 146.8, 146.5, 145.6, 139.7, 135.2, 129.3, 124.0, 123.9, 117.1, 102.9, 60.0, 26.4, 24.8, 22.1, 20.6, 14.3; HRMS (ESI):  $m/z$   $[\text{M} + \text{Na}]^+$  calcd for  $\text{C}_{19}\text{H}_{18}\text{N}_4\text{NaO}_4$ : 389.1220; found: 389.1222.

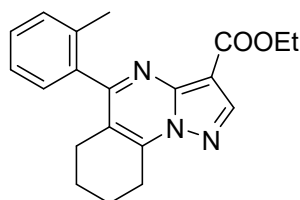

**ethyl 5-(*o*-tolyl)-6,7,8,9-tetrahydropyrazolo[1,5-*a*]quinazoline-3-carboxylate (4n):**  
Yield 91% (152.6 mg; petroleum ether/EtOAc = 10:1); light yellow solid; mp 139–141 °C;  $^1\text{H}$  NMR (400 MHz,  $\text{CDCl}_3$ ):  $\delta$  (ppm) 8.54 (s, 1H), 7.34–7.30 (m, 1H), 7.28 (d,  $J = 6.4$  Hz, 1H), 7.26–7.21 (m, 2H), 4.37 (q,  $J = 7.2$  Hz, 2H), 3.26 (t,  $J = 6.4$  Hz, 2H), 2.46 (s, 2H), 2.20 (s, 3H), 2.04–1.97 (m, 2H), 1.80 (d,  $J = 5.2$  Hz, 2H), 1.37 (t,  $J = 7.2$  Hz, 3H);  $^{13}\text{C}$  NMR (100 MHz,  $\text{CDCl}_3$ )  $\delta$  (ppm): 162.9, 162.5, 146.4, 145.8, 145.3, 137.6, 135.3, 130.2, 128.5, 128.1, 125.3, 118.1, 102.5, 59.7, 25.2, 24.4, 21.8, 20.7, 19.5, 14.3; HRMS (ESI):  $m/z$   $[\text{M} + \text{H}]^+$  calcd for  $\text{C}_{20}\text{H}_{22}\text{N}_3\text{O}_2$ : 336.1707; found: 336.1709.

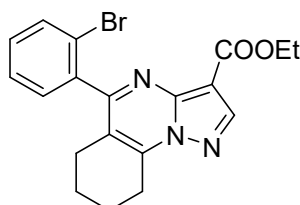

**ethyl 5-(2-bromophenyl)-6,7,8,9-tetrahydropyrazolo[1,5-*a*]quinazoline-3-carboxylate (4o):**  
Yield 89% (178 mg; petroleum ether/EtOAc = 8:1); light yellow solid; mp 194–196 °C;  $^1\text{H}$  NMR (400 MHz,  $\text{CDCl}_3$ ):  $\delta$  (ppm) 8.55 (s, 1H), 7.64 (d,  $J = 8.0$  Hz, 1H), 7.45–7.40 (m, 1H), 7.38–7.35 (m, 1H), 7.33–7.28 (m, 1H), 4.37 (q,  $J = 7.2$  Hz, 2H), 3.34–3.18 (m, 2H), 2.73–

2.63 (m, 1H), 2.39–2.30 (m, 1H), 2.06–1.98 (m, 2H), 1.90–1.75 (m, 2H), 1.37 (t,  $J = 7.2$  Hz, 3H);  $^{13}\text{C}$  NMR (100 MHz,  $\text{CDCl}_3$ ):  $\delta$  (ppm) 162.4, 161.6, 146.5, 145.8, 145.4, 139.3, 132.4, 130.1, 130.0, 127.4, 121.7, 118.3, 102.9, 59.9, 24.8, 24.5, 21.7, 20.7, 14.4; HRMS (ESI):  $m/z$   $[\text{M} + \text{H}]^+$  calcd for  $\text{C}_{19}\text{H}_{19}\text{BrN}_3\text{O}_2$ : 400.0655; found: 400.0656.

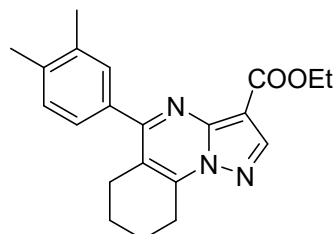

**ethyl 5-(3,4-dimethylphenyl)-6,7,8,9-tetrahydropyrazolo[1,5-a]quinazoline-3-carboxylate (4p):**

Yield 95% (166 mg; petroleum ether/EtOAc = 8:1); light yellow solid; mp 145–147 °C;  $^1\text{H}$  NMR (400 MHz,  $\text{CDCl}_3$ ):  $\delta$  (ppm) 8.52 (s, 1H), 7.48 (s, 1H), 7.37 (dd,  $J = 8.0, 1.6$  Hz, 1H), 7.19 (d,  $J = 7.6$  Hz, 1H), 4.39 (q,  $J = 7.2$  Hz, 2H), 3.22 (t,  $J = 6.4$  Hz, 2H), 2.79 (t,  $J = 5.8$  Hz, 2H), 2.32 (s, 3H), 2.31 (s, 3H), 2.06–1.98 (m, 2H), 1.81–1.74 (m, 2H), 1.41 (t,  $J = 7.2$  Hz, 3H);  $^{13}\text{C}$  NMR (100 MHz,  $\text{CDCl}_3$ ):  $\delta$  (ppm) 162.6, 161.8, 146.3, 145.7, 145.2, 137.8, 136.3, 135.6, 130.1, 128.9, 126.3, 117.4, 102.3, 59.7, 26.7, 24.6, 22.1, 20.7, 19.6, 19.4, 14.3; HRMS (ESI):  $m/z$   $[\text{M} + \text{Na}]^+$  calcd for  $\text{C}_{21}\text{H}_{23}\text{N}_3\text{NaO}_2$ : 372.1682; found: 372.1681.

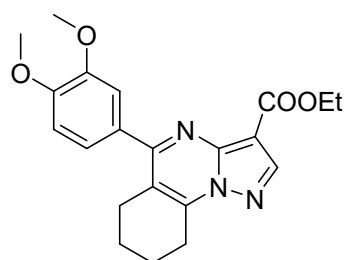

**ethyl 5-(3,4-dimethoxyphenyl)-6,7,8,9-tetrahydropyrazolo[1,5-a]quinazoline-3-carboxylate (4q):**

Yield 95% (181.2 mg; petroleum ether/EtOAc = 5:1); white solid; mp 124–126 °C;  $^1\text{H}$  NMR (400 MHz,  $\text{CDCl}_3$ ):  $\delta$  (ppm) 8.53 (s, 1H), 7.33 (d,  $J = 2.0$  Hz, 1H), 7.26 (dd,  $J = 8.4, 2.0$  Hz, 1H), 6.94 (d,  $J = 8.4$  Hz, 1H), 4.40 (q,  $J = 7.2$  Hz, 2H), 3.96 (s, 3H), 3.95 (s, 3H), 3.25 (t,  $J = 6.6$  Hz, 2H), 2.85 (t,  $J = 6.0$  Hz, 2H), 2.10–2.04 (m, 2H), 1.85–1.78 (m, 2H), 1.41 (t,  $J = 7.2$  Hz, 3H);  $^{13}\text{C}$  NMR (100 MHz,  $\text{CDCl}_3$ ):  $\delta$  (ppm) 162.7, 161.1, 149.9, 148.5, 146.5, 145.6, 145.4, 130.7, 122.1, 117.3, 112.4, 110.1, 102.2, 59.8, 55.8, 55.7, 26.9, 24.7, 22.3, 20.7, 14.3; HRMS (ESI):  $m/z$   $[\text{M} + \text{Na}]^+$  calcd for  $\text{C}_{21}\text{H}_{23}\text{N}_3\text{NaO}_4$ : 404.1581; found: 404.1577.

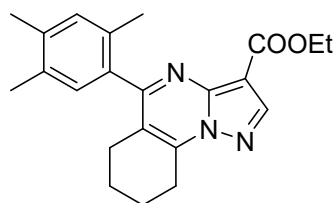

**ethyl 5-(2,4,5-trimethylphenyl)-6,7,8,9-tetrahydropyrazolo[1,5-a]quinazoline-3-carboxylate (4r):**

Yield 86% (156.3 mg; petroleum ether/EtOAc = 5:1); white solid; mp 207–209 °C; <sup>1</sup>H NMR (400 MHz, CDCl<sub>3</sub>): δ (ppm) 8.53 (s, 1H), 7.05 (s, 1H), 7.00 (s, 1H), 4.37 (q, *J* = 7.2 Hz, 2H), 3.25 (t, *J* = 6.6 Hz, 2H), 2.48 (s, 2H), 2.28 (s, 3H), 2.24 (s, 3H), 2.12 (s, 3H), 2.04–1.98 (m, 2H), 1.83–1.76 (m, 2H), 1.37 (t, *J* = 7.2 Hz, 3H); <sup>13</sup>C NMR (100 MHz, CDCl<sub>3</sub>): δ (ppm) 163.4, 162.6, 146.4, 145.8, 145.1, 136.9, 135.2, 133.5, 132.4, 131.5, 129.2, 118.3, 102.5, 59.8, 25.3, 24.5, 21.9, 20.8, 19.4, 19.0, 18.9, 14.3; HRMS (ESI): *m/z* [M + Na]<sup>+</sup> calcd for C<sub>22</sub>H<sub>25</sub>N<sub>3</sub>NaO<sub>2</sub>: 386.1839; found: 386.1838.

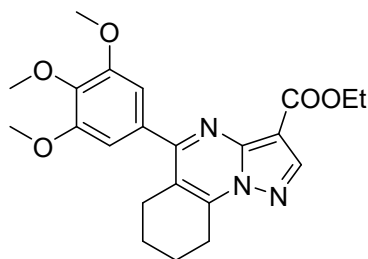

**ethyl 5-(3,4,5-trimethoxyphenyl)-6,7,8,9-tetrahydropyrazolo[1,5-a]quinazoline-3-carboxylate (4s):**

Yield 94% (193.4 mg; petroleum ether/EtOAc = 5:1); white solid; mp 206–208 °C; <sup>1</sup>H NMR (400 MHz, CDCl<sub>3</sub>): δ (ppm) 8.54 (s, 1H), 6.90 (s, 2H), 4.40 (q, *J* = 7.2 Hz, 2H), 3.91(4) (s, 6H), 3.91 (s, 3H), 3.26 (t, *J* = 6.4 Hz, 2H), 2.82 (t, *J* = 5.8 Hz, 2H), 2.10–2.04 (m, 2H), 1.87–1.80 (m, 2H), 1.41 (t, *J* = 7.2 Hz, 3H); <sup>13</sup>C NMR (100 MHz, CDCl<sub>3</sub>): δ (ppm) 162.8, 161.5, 152.9, 146.7, 145.8, 145.7, 139.1, 133.7, 117.4, 106.5, 102.6, 60.9, 60.0, 56.2, 26.9, 24.8, 22.4, 20.8, 14.4; HRMS (ESI): *m/z* [M + Na]<sup>+</sup> calcd for C<sub>22</sub>H<sub>25</sub>N<sub>3</sub>NaO<sub>5</sub>: 434.1686; found: 434.1684.

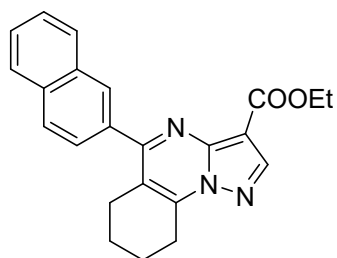

**ethyl 5-(naphthalen-2-yl)-6,7,8,9-tetrahydropyrazolo[1,5-a]quinazoline-3-carboxylate (4t):**

Yield 96% (178.3 mg; petroleum ether/EtOAc = 8:1); yellow solid; mp 133–135 °C; <sup>1</sup>H NMR (400 MHz, CDCl<sub>3</sub>): δ (ppm) 8.56 (s, 1H), 8.13 (s, 1H), 7.89–7.82 (m, 3H), 7.76 (dd, *J* = 8.8, 1.6 Hz, 1H), 7.52–7.46 (m, 2H), 4.40 (q, *J* = 7.2 Hz, 2H), 3.22 (t, *J* = 6.4 Hz, 2H), 2.79 (t, *J* = 5.8 Hz, 2H), 2.05–1.97 (m, 2H), 1.78–1.71 (m, 2H), 1.40 (t, *J* = 7.2 Hz, 3H); <sup>13</sup>C NMR (100 MHz, CDCl<sub>3</sub>): δ (ppm) 162.7, 161.5, 146.6, 145.8, 145.5, 135.5, 133.2, 132.6, 128.9, 128.3, 127.6, 127.5, 126.8, 126.24, 126.20, 117.6, 102.5, 59.9, 26.7, 24.7, 22.1, 20.7, 14.3; HRMS (ESI): *m/z* [M + H]<sup>+</sup> calcd for C<sub>23</sub>H<sub>22</sub>N<sub>3</sub>O<sub>2</sub>: 372.1707; found: 372.1710.

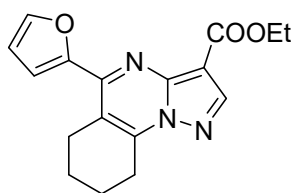

**ethyl 5-(furan-2-yl)-6,7,8,9-tetrahydropyrazolo[1,5-a]quinazoline-3-carboxylate (4u):**

Yield 98% (152.6 mg; petroleum ether/EtOAc = 8:1); yellow solid; mp 171–173 °C; <sup>1</sup>H NMR (400 MHz, CDCl<sub>3</sub>): δ (ppm) 8.51 (s, 1H), 7.67 (d, *J* = 0.8 Hz, 1H), 7.35 (d, *J* = 3.2 Hz, 1H), 6.60 (dd, *J* = 3.6, 1.6 Hz, 1H), 4.43 (q, *J* = 7.2 Hz, 2H), 3.23 (t, *J* = 6.4 Hz, 2H), 3.11 (t, *J* = 5.8 Hz, 2H), 2.06–2.00 (m, 2H), 1.96–1.89 (m, 2H), 1.45 (t, *J* = 7.2 Hz, 3H); <sup>13</sup>C NMR (100 MHz, CDCl<sub>3</sub>): δ (ppm) 162.9, 152.5, 149.7, 147.0, 146.0, 145.5, 145.0, 116.0, 115.4, 112.1, 60.1, 25.4, 25.0, 22.1, 20.4, 14.4; HRMS (ESI): *m/z* [M + H]<sup>+</sup> calcd for C<sub>17</sub>H<sub>18</sub>N<sub>3</sub>O<sub>3</sub>: 312.1343; found: 312.1345.

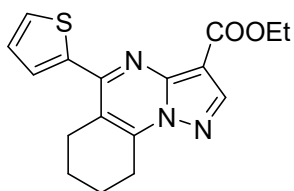

**ethyl 5-(thiophen-2-yl)-6,7,8,9-tetrahydropyrazolo[1,5-a]quinazoline-3-carboxylate (4v):**

Yield 97% (158.8 mg; petroleum ether/EtOAc = 8:1); yellow solid; mp 198–200 °C; <sup>1</sup>H NMR (400 MHz, CDCl<sub>3</sub>): δ (ppm) 8.51 (s, 1H), 7.66 (d, *J* = 4.0 Hz, 1H), 7.56 (dd, *J* = 4.8, 0.4 Hz, 1H), 7.17–7.12 (m, 1H), 4.43 (q, *J* = 7.2 Hz, 2H), 3.23 (t, *J* = 6.2 Hz, 2H), 3.05 (t, *J* = 6.0 Hz, 2H), 2.09–2.01 (m, 2H), 1.96–1.89 (m, 2H), 1.48 (t, *J* = 7.2 Hz, 3H); <sup>13</sup>C NMR (100 MHz, CDCl<sub>3</sub>): δ (ppm) 163.0, 153.8, 147.0, 145.8, 145.2, 143.2, 130.6, 129.8, 127.9, 116.0, 102.3, 60.1, 26.6, 25.0, 22.2, 20.5, 14.4; HRMS (ESI): *m/z* [M + H]<sup>+</sup> calcd for C<sub>17</sub>H<sub>18</sub>N<sub>3</sub>O<sub>2</sub>S: 328.1114; found: 328.1113.

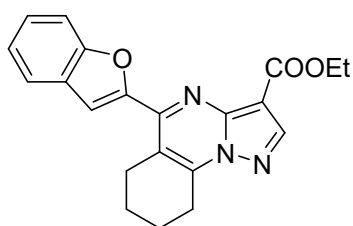

**ethyl 5-(benzofuran-2-yl)-6,7,8,9-tetrahydropyrazolo[1,5-a]quinazoline-3-carboxylate (4w):**

Yield 92% (166 mg; petroleum ether/EtOAc = 8:1); yellow solid; mp 170–172 °C; <sup>1</sup>H NMR (400 MHz, CDCl<sub>3</sub>): δ (ppm) 8.52 (s, 1H), 7.66–7.62 (m, 2H), 7.54 (d, *J* = 8.4 Hz, 1H), 7.39–7.34 (m, 1H), 7.29–7.24 (m, 1H), 4.45 (q, *J* = 7.2 Hz, 2H), 3.19 (t, *J* = 7.8, 4H), 2.06–1.99 (m, 2H), 1.96–1.89 (m, 2H), 1.48 (t, *J* = 7.2 Hz, 3H); <sup>13</sup>C NMR (100 MHz, CDCl<sub>3</sub>): δ (ppm) 162.7, 155.4, 153.7, 149.7, 147.0, 146.2, 145.4, 127.7, 126.1, 123.3, 121.9, 116.8, 111.7, 111.2, 102.5, 60.1, 25.4, 25.0, 22.0, 20.3, 14.4; HRMS (ESI): *m/z* [M + H]<sup>+</sup> calcd for C<sub>21</sub>H<sub>20</sub>N<sub>3</sub>O<sub>3</sub>: 362.1499; found: 362.1502.



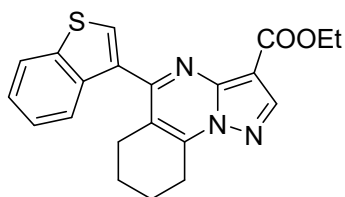

**ethyl 5-(benzo[*b*]thiophen-3-yl)-6,7,8,9-tetrahydropyrazolo[1,5-*a*]quinazoline-3-carboxylate (4x):**

Yield 92% (173.6 mg; petroleum ether/EtOAc = 8:1); yellow solid; mp 192–197 °C; <sup>1</sup>H NMR (400 MHz, CDCl<sub>3</sub>): δ (ppm) 8.59 (s, 1H), 8.20 (dd, *J* = 6.4, 2.0 Hz, 1H), 7.90 (dd, *J* = 7.2, 2.8 Hz, 1H), 7.75 (s, 1H), 7.45–7.37 (m, 2H), 4.40 (q, *J* = 7.2 Hz, 2H), 3.28 (t, *J* = 6.6 Hz, 2H), 2.81 (t, *J* = 6.0 Hz, 2H), 2.08–2.01 (m, 2H), 1.83–1.76 (m, 2H), 1.40 (t, *J* = 7.2 Hz, 3H); <sup>13</sup>C NMR (100 MHz, CDCl<sub>3</sub>): δ (ppm) 162.9, 156.6, 146.9, 145.9, 145.5, 139.8, 137.9, 133.3, 128.8, 124.8, 124.7, 124.2, 122.3, 118.2, 102.9, 60.0, 26.3, 24.8, 22.2, 20.8, 14.4; HRMS (ESI): *m/z* [M + Na]<sup>+</sup> calcd for C<sub>21</sub>H<sub>19</sub>N<sub>3</sub>NaO<sub>2</sub>S: 400.1090; found: 400.1092.

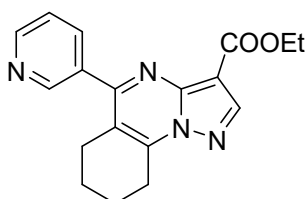

**ethyl 5-(pyridin-3-yl)-6,7,8,9-tetrahydropyrazolo[1,5-*a*]quinazoline-3-carboxylate (4y):**

Yield 97% (156.3 mg; petroleum ether/EtOAc = 2:1); yellow solid; mp 174–176 °C; <sup>1</sup>H NMR (400 MHz, CDCl<sub>3</sub>): δ (ppm) 8.92 (d, *J* = 2.0 Hz, 1H), 8.71 (dd, *J* = 4.8, 1.6 Hz, 1H), 8.56 (s, 1H), 8.05 (dt, *J* = 8.0, 2.0 Hz, 1H), 7.45 (dd, *J* = 8.0, 4.8 Hz, 1H), 4.40 (q, *J* = 7.2 Hz, 2H), 3.29 (t, *J* = 6.6 Hz, 2H), 2.82 (t, *J* = 6.0 Hz, 2H), 2.12–2.05 (m, 2H), 1.89–1.82 (m, 2H), 1.41 (t, *J* = 7.2 Hz, 3H); <sup>13</sup>C NMR (100 MHz, CDCl<sub>3</sub>): δ (ppm) 162.7, 158.7, 150.2, 149.7, 146.9, 146.3, 145.9, 136.7, 134.2, 123.2, 117.4, 103.0, 60.2, 26.6, 24.9, 22.3, 20.8, 14.4; HRMS (ESI): *m/z* [M + H]<sup>+</sup> calcd for C<sub>18</sub>H<sub>19</sub>N<sub>4</sub>O<sub>2</sub>: 323.1503; found: 323.1505.

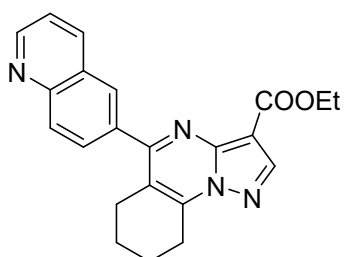

**ethyl 5-(quinolin-6-yl)-6,7,8,9-tetrahydropyrazolo[1,5-*a*]quinazoline-3-carboxylate (4z):**

Yield 96% (178.8 mg; petroleum ether/EtOAc = 2:1); yellow solid; mp 152–154 °C; <sup>1</sup>H NMR (400 MHz, CDCl<sub>3</sub>): δ (ppm) 8.95 (dd, *J* = 4.0, 1.6 Hz, 1H), 8.56 (s, 1H), 8.22 (dd, *J* = 8.4, 1.2 Hz, 1H), 8.19–8.15 (m, 2H), 8.00 (dd, *J* = 8.8, 2.0 Hz, 1H), 7.45 (q, *J* = 4.0 Hz, 1H), 4.40 (q, *J* = 7.2 Hz, 2H), 3.26 (t, *J* = 6.4 Hz, 2H), 2.82 (t, *J* = 5.8 Hz, 2H), 2.09–2.03 (m, 2H), 1.84–1.77 (m, 2H), 1.41 (t, *J* = 7.2 Hz, 3H); <sup>13</sup>C NMR (100 MHz, CDCl<sub>3</sub>): δ (ppm) 162.5, 160.7, 151.1, 147.9, 146.6, 145.8, 145.7, 136.5, 136.3, 129.8, 128.9, 128.8, 127.5, 121.5, 117.5,

102.6, 59.9, 26.6, 24.7, 22.1, 20.7, 14.3; HRMS (ESI):  $m/z$   $[M + H]^+$  calcd for  $C_{22}H_{21}N_4O_2$ : 373.1659; found: 373.1657.

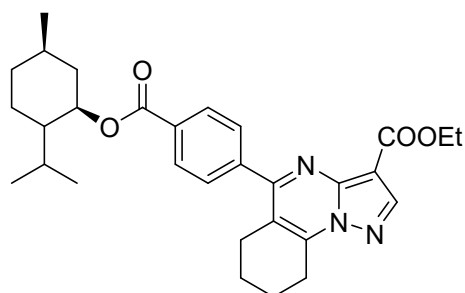

**ethyl 5-(4-(((1*R*,5*R*)-2-isopropyl-5-methylcyclohexyl)oxy)carbonyl)phenyl)-6,7,8,9-tetrahydropyrazolo[1,5-*a*]quinazoline-3-carboxylate (4aa):**

Yield 94% (236.7 mg; petroleum ether/EtOAc = 8:1); light yellow solid; mp 113–115 °C;  $^1H$  NMR (400 MHz,  $CDCl_3$ ):  $\delta$  (ppm) 8.59–8.52 (m, 1H), 8.15 (d,  $J = 8.0$  Hz, 2H), 7.74 (d,  $J = 8.0$  Hz, 2H), 4.98 (td,  $J = 10.8, 4.4$  Hz, 1H), 4.39 (q,  $J = 7.2$  Hz, 2H), 3.27 (t,  $J = 6.0$  Hz, 2H), 2.77 (t,  $J = 5.2$  Hz, 2H), 2.17 (d,  $J = 11.6$  Hz, 1H), 2.10–2.03 (m, 2H), 2.01–1.95 (m, 1H), 1.86–1.79 (m, 2H), 1.75 (d,  $J = 11.6$  Hz, 2H), 1.59 (t,  $J = 11.2$  Hz, 2H), 1.40 (t,  $J = 7.2$  Hz, 3H), 1.15 (q,  $J = 11.6$  Hz, 2H), 0.95 (dd,  $J = 6.4, 3.2$  Hz, 7H), 0.82 (d,  $J = 6.8$  Hz, 3H);  $^{13}C$  NMR (100 MHz,  $CDCl_3$ ):  $\delta$  (ppm) 165.4, 162.6, 160.6, 146.7, 145.9, 145.7, 142.3, 131.2, 129.2, 129.0, 117.3, 102.8, 75.0, 60.0, 47.1, 40.8, 34.1, 31.3, 26.5, 26.4, 24.7, 23.5, 22.1, 21.9, 20.7, 20.6, 16.4, 14.3; HRMS (ESI):  $m/z$   $[M + H]^+$  calcd for  $C_{30}H_{38}N_3O_4$ : 504.2857; found: 504.2856.

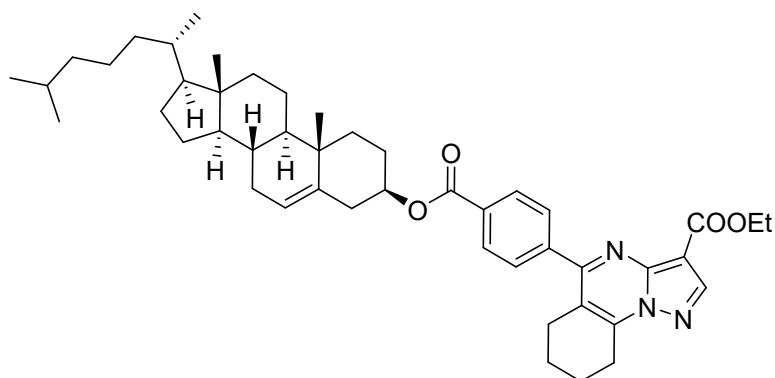

**ethyl 5-(4-(((3*R*,8*R*,9*R*,10*S*,13*S*,14*R*,17*S*)-10,13-dimethyl-17-((*S*)-6-methylheptan-2-yl)-2,3,4,7,8,9,10,11,12,13,14,15,16,17-tetradecahydro-1*H*-cyclopenta[*a*]phenanthren-3-yl)oxy)carbonyl)phenyl)-6,7,8,9-tetrahydropyrazolo[1,5-*a*]quinazoline-3-carboxylate (4ab):**

Yield 94% (345 mg; petroleum ether/EtOAc = 5:1); light yellow solid; mp 231–233 °C;  $^1H$  NMR (400 MHz,  $CDCl_3$ ):  $\delta$  (ppm) 8.54 (s, 1H), 8.13 (d,  $J = 8.0$  Hz, 2H), 7.73 (d,  $J = 8.0$  Hz, 2H), 5.44 (d,  $J = 3.6$  Hz, 1H), 4.95–4.83 (m, 1H), 4.39 (q,  $J = 7.2$  Hz, 2H), 3.26 (t,  $J = 6.2$  Hz, 2H), 2.75 (t,  $J = 5.4$  Hz, 2H), 2.50 (d,  $J = 8.0$  Hz, 2H), 2.08–2.01 (m, 4H), 2.00–1.90 (m, 2H), 1.87–1.72 (m, 4H), 1.62–1.45 (m, 6H), 1.42–1.34 (m, 6H), 1.27–1.12 (m, 6H), 1.10–0.95 (m, 8H), 0.93 (d,  $J = 6.4$  Hz, 3H), 0.88 (d,  $J = 1.6$  Hz, 3H), 0.86 (d,  $J = 1.6$  Hz, 3H), 0.69 (s, 3H);  $^{13}C$  NMR (100 MHz,  $CDCl_3$ ):  $\delta$  (ppm) 165.3, 162.6, 160.6, 146.8, 145.9, 145.7, 142.3, 139.4,

131.3, 129.3, 129.0, 122.7, 117.3, 102.9, 74.8, 60.0, 56.6, 56.0, 49.9, 42.2, 39.6, 39.4, 38.1, 36.9, 36.5, 36.1, 35.7, 31.8, 31.7, 28.1, 27.9, 27.8, 26.6, 24.8, 24.2, 23.7, 22.7, 22.5, 22.2, 20.9, 20.8, 19.3, 18.6, 14.4, 11.7; HRMS (ESI):  $m/z$   $[M + H]^+$  calcd for  $C_{47}H_{64}N_3O_4$ : 734.4891; found: 734.4897.

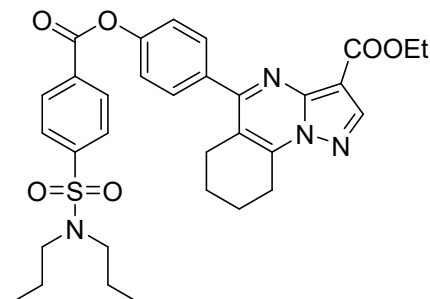

**ethyl 5-(4-((*N,N*-dipropylsulfamoyl)benzoyl)oxy)phenyl-6,7,8,9-tetrahydropyrazolo[1,5-*a*]quinazoline-3-carboxylate (4ac):**

Yield 90% (272 mg; petroleum ether/EtOAc = 5:1); light yellow solid; mp 130–132 °C;  $^1H$  NMR (400 MHz,  $CDCl_3$ ):  $\delta$  (ppm) 8.54 (s, 1H), 8.35 (d,  $J = 8.4$  Hz, 2H), 7.97 (d,  $J = 8.4$  Hz, 2H), 7.80 (d,  $J = 8.4$  Hz, 2H), 7.36 (d,  $J = 8.4$  Hz, 2H), 4.40 (q,  $J = 7.2$  Hz, 2H), 3.27 (t,  $J = 6.4$  Hz, 2H), 3.18–3.11 (m, 4H), 2.85 (t,  $J = 5.6$  Hz, 2H), 2.12–2.03 (m, 2H), 1.89–1.79 (m, 2H), 1.63–1.53 (m, 4H), 1.41 (t,  $J = 7.2$  Hz, 3H), 0.90 (t,  $J = 7.4$  Hz, 6H);  $^{13}C$  NMR (100 MHz,  $CDCl_3$ ):  $\delta$  (ppm) 163.4, 162.5, 160.4, 151.3, 146.5, 145.8, 145.7, 144.8, 136.1, 132.4, 130.6, 130.5, 127.0, 121.2, 117.3, 102.5, 59.9, 49.7, 26.7, 24.7, 22.1, 21.7, 20.7, 14.3, 11.0; HRMS (ESI):  $m/z$   $[M + Na]^+$  calcd for  $C_{32}H_{36}N_4NaO_6S$ : 627.2248; found: 627.2241.

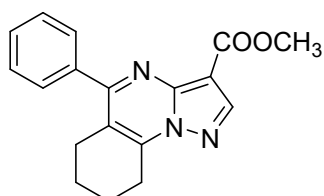

**methyl 5-phenyl-6,7,8,9-tetrahydropyrazolo[1,5-*a*]quinazoline-3-carboxylate (4ad):**

Yield 98% (150.6 mg; petroleum ether/EtOAc = 8:1); brown solid; mp 161–163 °C;  $^1H$  NMR (400 MHz,  $CDCl_3$ ):  $\delta$  (ppm) 8.55 (s, 1H), 7.68–7.63 (m, 2H), 7.48–7.43 (m, 3H), 3.91 (s, 3H), 3.25 (t,  $J = 6.4$  Hz, 2H), 2.78 (t,  $J = 6.0$  Hz, 2H), 2.08–2.01 (m, 2H), 1.83–1.77 (m, 2H);  $^{13}C$  NMR (100 MHz,  $CDCl_3$ ):  $\delta$  (ppm) 163.2, 161.8, 146.8, 145.7, 145.6, 138.1, 129.2, 129.0, 128.1, 117.5, 102.3, 51.3, 26.6, 24.7, 22.2, 20.8; HRMS (ESI):  $m/z$   $[M + H]^+$  calcd for  $C_{18}H_{18}N_3O_2$ : 308.1394; found: 308.1392.

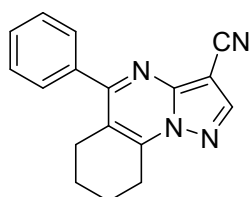

**5-phenyl-6,7,8,9-tetrahydropyrazolo[1,5-*a*]quinazoline-3-carbonitrile (4ae):**

Yield 98% (134.4 mg; petroleum ether/EtOAc = 10:1); white solid; mp 230–232 °C; <sup>1</sup>H NMR (400 MHz, CDCl<sub>3</sub>): δ (ppm) 8.34 (s, 1H), 7.65–7.59 (m, 2H), 7.52–7.46 (m, 3H), 3.26 (t, *J* = 6.6 Hz, 2H), 2.79 (t, *J* = 6.0 Hz, 2H), 2.10–2.03 (m, 2H), 1.86–1.79 (m, 2H); <sup>13</sup>C NMR (100 MHz, CDCl<sub>3</sub>): δ (ppm) 162.4, 148.1, 146.7, 146.3, 137.5, 129.7, 128.9, 128.4, 118.7, 113.4, 82.4, 26.7, 24.8, 22.2, 20.8; HRMS (ESI): *m/z* [M + Na]<sup>+</sup> calcd for C<sub>17</sub>H<sub>14</sub>N<sub>4</sub>Na: 297.1111; found: 297.1108.

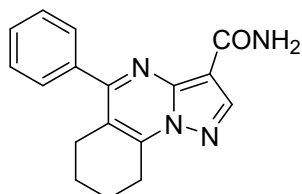

**5-phenyl-6,7,8,9-tetrahydropyrazolo[1,5-*a*]quinazoline-3-carboxamide (4af):**

Yield 90% (131.5 mg; petroleum ether/EtOAc = 2:1); white solid; mp 278–280 °C; <sup>1</sup>H NMR (400 MHz, CDCl<sub>3</sub>): δ (ppm) 8.65 (s, 1H), 7.98 (s, 1H), 7.63–7.58 (m, 2H), 7.55–7.49 (m, 3H), 5.62 (s, 1H), 3.29 (t, *J* = 6.6 Hz, 2H), 2.78 (t, *J* = 6.2 Hz, 2H), 2.11–2.04 (m, 2H), 1.87–1.80 (m, 2H); <sup>13</sup>C NMR (100 MHz, CDCl<sub>3</sub>): δ (ppm) 164.3, 160.8, 146.3, 146.0, 144.6, 138.1, 129.5, 128.7, 128.4, 117.1, 26.7, 24.9, 22.4, 20.9; HRMS (ESI): *m/z* [M + Na]<sup>+</sup> calcd for C<sub>17</sub>H<sub>16</sub>N<sub>4</sub>NaO: 315.1216; found: 315.1214.

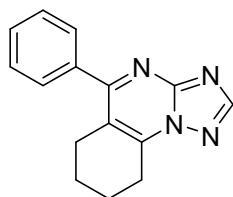

**5-phenyl-6,7,8,9-tetrahydro-[1,2,4]triazolo[1,5-*a*]quinazoline (4ag):**

Yield 98% (122.6 mg; petroleum ether/EtOAc = 5:1); yellow solid; mp 143–145 °C; <sup>1</sup>H NMR (400 MHz, CDCl<sub>3</sub>): δ (ppm) 8.47 (s, 1H), 7.65–7.60 (m, 2H), 7.52–7.46 (m, 3H), 3.27 (t, *J* = 6.6 Hz, 2H), 2.80 (t, *J* = 6.0 Hz, 2H), 2.10–2.03 (m, 2H), 1.86–1.79 (m, 2H); <sup>13</sup>C NMR (100 MHz, CDCl<sub>3</sub>): δ (ppm) 164.2, 155.5, 153.5, 146.1, 137.8, 129.5, 128.8, 128.3, 118.2, 26.6, 24.9, 22.3, 20.7; HRMS (ESI): *m/z* [M + H]<sup>+</sup> calcd for C<sub>15</sub>H<sub>15</sub>N<sub>4</sub>: 251.1291; found: 251.1296.

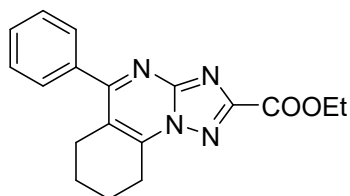

**ethyl 5-phenyl-6,7,8,9-tetrahydro-[1,2,4]triazolo[1,5-*a*]quinazoline-2-carboxylate (4ah):**

Yield 98% (158 mg; petroleum ether/EtOAc = 3:1); white solid; mp 186–188 °C; <sup>1</sup>H NMR (400 MHz, CDCl<sub>3</sub>): δ (ppm) 7.67–7.61 (m, 2H), 7.51–7.46 (m, 3H), 4.56 (qd, *J* = 7.2, 0.8 Hz, 2H), 3.34 (t, *J* = 6.2 Hz, 2H), 2.83 (t, *J* = 5.8 Hz, 2H), 2.11–2.04 (m, 2H), 1.87–1.80 (m, 2H), 1.49 (td, *J* = 7.2, 0.8 Hz, 3H); <sup>13</sup>C NMR (100 MHz, CDCl<sub>3</sub>): δ (ppm) 165.5, 160.4, 156.9, 153.5, 146.6, 137.4, 129.7, 128.8, 128.2, 119.9, 62.3, 26.8, 24.9, 22.1, 20.5, 14.1; HRMS (ESI): *m/z* [M + H]<sup>+</sup> calcd for C<sub>18</sub>H<sub>19</sub>N<sub>4</sub>O<sub>2</sub>: 323.1503; found: 323.1505.

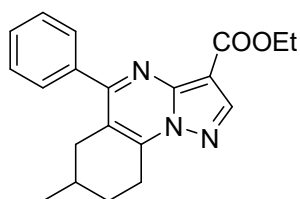

**ethyl 7-methyl-5-phenyl-6,7,8,9-tetrahydropyrazolo[1,5-*a*]quinazoline-3-carboxylate (4ai):**

Yield 98% (164.3 mg; petroleum ether/EtOAc = 10:1); white solid; mp 116–118 °C; <sup>1</sup>H NMR (400 MHz, CDCl<sub>3</sub>): δ (ppm) 8.54 (s, 1H), 7.70–7.64 (m, 2H), 7.51–7.45 (m, 3H), 4.48–4.32 (m, 2H), 3.46 (dd, *J* = 19.6, 5.2 Hz, 1H), 3.19–3.08 (m, 1H), 2.77 (dd, *J* = 16.4, 4.0 Hz, 1H), 2.50 (dd, *J* = 16.4, 10.4 Hz, 1H), 2.18–2.10 (m, 1H), 1.86–1.76 (m, 1H), 1.69–1.58 (m, 1H), 1.40 (t, *J* = 7.0 Hz, 3H), 1.09 (d, *J* = 6.4 Hz, 3H); <sup>13</sup>C NMR (100 MHz, CDCl<sub>3</sub>): δ (ppm) 162.7, 161.7, 146.7, 145.9, 145.4, 138.2, 129.3, 129.1, 128.1, 117.1, 102.6, 60.0, 34.9, 28.9, 28.8, 24.9, 21.2, 14.4; HRMS (ESI): *m/z* [M + H]<sup>+</sup> calcd for C<sub>20</sub>H<sub>22</sub>N<sub>3</sub>O<sub>2</sub>: 336.1707; found: 336.1706.

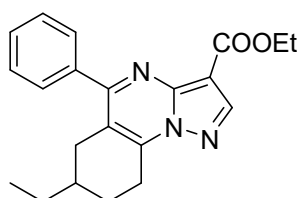

**ethyl 7-ethyl-5-phenyl-6,7,8,9-tetrahydropyrazolo[1,5-*a*]quinazoline-3-carboxylate (4aj):**

Yield 98% (171 mg; petroleum ether/EtOAc = 8:1); white solid; mp 115–117 °C; <sup>1</sup>H NMR (400 MHz, CDCl<sub>3</sub>): δ (ppm) 8.53 (s, 1H), 7.71–7.65 (m, 2H), 7.51–7.44 (m, 3H), 4.47–4.31 (m, 2H), 3.52–3.41 (m, 1H), 3.19–3.06 (m, 1H), 2.81 (dd, *J* = 16.0, 3.2 Hz, 1H), 2.51 (dd, *J* = 16.4, 9.2 Hz, 1H), 2.26–2.16 (m, 1H), 1.67–1.55 (m, 2H), 1.47–1.37 (m, 5H), 0.93 (t, *J* = 7.4 Hz, 3H); <sup>13</sup>C NMR (100 MHz, CDCl<sub>3</sub>): δ (ppm) 162.7, 161.8, 146.7, 145.9, 145.6, 138.2, 129.3, 129.1, 128.1, 117.1, 102.6, 60.0, 35.4, 32.9, 28.2, 26.4, 24.9, 14.4, 11.3; HRMS (ESI): *m/z* [M + H]<sup>+</sup> calcd for C<sub>21</sub>H<sub>24</sub>N<sub>3</sub>O<sub>2</sub>: 350.1863; found: 350.1865.

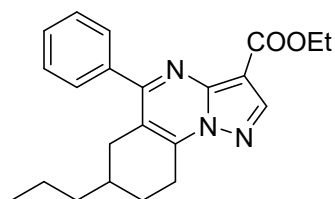

**ethyl 5-phenyl-7-propyl-6,7,8,9-tetrahydropyrazolo[1,5-*a*]quinazoline-3-carboxylate (4ak):**

Yield 98% (178 mg; petroleum ether/EtOAc = 10:1); white solid; mp 135–137 °C; <sup>1</sup>H NMR (400 MHz, CDCl<sub>3</sub>): δ (ppm) 8.53 (s, 1H), 7.71–7.65 (m, 2H), 7.50–7.43 (m, 3H), 4.47–4.32 (m, 2H), 3.49–3.39 (m, 1H), 3.17–3.05 (m, 1H), 2.84–2.75 (m, 1H), 2.50 (dd, *J* = 16.0, 9.6 Hz, 1H), 2.22–2.14 (m, 1H), 1.71–1.54 (m, 2H), 1.40 (t, *J* = 7.0 Hz, 3H), 1.38–1.27 (m, 4H), 0.92–0.85 (m, 3H); <sup>13</sup>C NMR (100 MHz, CDCl<sub>3</sub>): δ (ppm) 162.6, 161.6, 146.5, 145.8, 145.5,

138.1, 129.1, 129.0, 128.0, 117.0, 102.5, 59.8, 37.6, 33.3, 33.1, 26.6, 24.7, 19.8, 14.3, 14.0; HRMS (ESI):  $m/z$   $[M + H]^+$  calcd for  $C_{22}H_{26}N_3O_2$ : 364.2020; found: 364.2023.

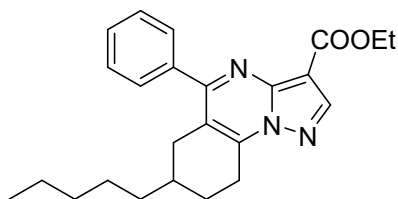

**ethyl 7-pentyl-5-phenyl-6,7,8,9-tetrahydropyrazolo[1,5-a]quinazoline-3-carboxylate (4al):**

Yield 98% (191.8 mg; petroleum ether/EtOAc = 8:1); white solid; mp 100–102 °C;  $^1H$  NMR (400 MHz,  $CDCl_3$ ):  $\delta$  (ppm) 8.53 (s, 1H), 7.71–7.65 (m, 2H), 7.51–7.44 (m, 3H), 4.47–4.32 (m, 2H), 3.51–3.40 (m, 1H), 3.19–3.06 (m, 1H), 2.85–2.75 (m, 1H), 2.51 (dd,  $J = 16.4, 9.2$  Hz, 1H), 2.25–2.14 (m, 1H), 1.70–1.55 (m, 2H), 1.43–1.33 (m, 6H), 1.31–1.20 (m, 5H), 0.86 (t,  $J = 6.8$  Hz, 3H);  $^{13}C$  NMR (100 MHz,  $CDCl_3$ ):  $\delta$  (ppm) 162.7, 161.7, 146.7, 145.9, 145.6, 138.2, 129.2, 129.1, 128.1, 117.1, 102.6, 59.9, 35.4, 33.7, 33.3, 31.8, 26.7, 26.4, 24.8, 22.4, 14.4, 13.9; HRMS (ESI):  $m/z$   $[M + Na]^+$  calcd for  $C_{24}H_{29}N_3NaO_2$ : 414.2152; found: 414.2155.

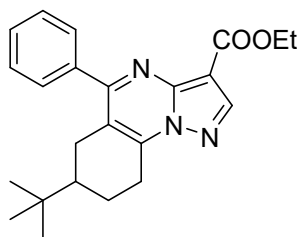

**ethyl 7-(*tert*-butyl)-5-phenyl-6,7,8,9-tetrahydropyrazolo[1,5-a]quinazoline-3-carboxylate (4am):**

Yield 97% (183 mg; petroleum ether/EtOAc = 8:1); white solid; mp 159–161 °C;  $^1H$  NMR (400 MHz,  $CDCl_3$ ):  $\delta$  (ppm) 8.53 (s, 1H), 7.72–7.67 (m, 2H), 7.51–7.45 (m, 3H), 4.48–4.31 (m, 2H), 3.56 (dd,  $J = 19.2, 5.2$  Hz, 1H), 3.11–3.00 (m, 1H), 2.76 (d,  $J = 15.2$  Hz, 1H), 2.66–2.56 (m, 1H), 2.30–2.23 (m, 1H), 1.57 (qd,  $J = 12.5, 5.6$  Hz, 1H), 1.40 (t,  $J = 7.0$  Hz, 4H), 0.93 (s, 9H);  $^{13}C$  NMR (100 MHz,  $CDCl_3$ ):  $\delta$  (ppm) 162.7, 161.9, 146.6, 145.8, 145.5, 138.2, 129.3, 129.0, 128.1, 117.6, 59.9, 44.1, 32.2, 28.2, 27.1, 26.0, 22.2, 14.4; HRMS (ESI):  $m/z$   $[M + Na]^+$  calcd for  $C_{23}H_{27}N_3NaO_2$ : 400.1995; found: 400.1997.

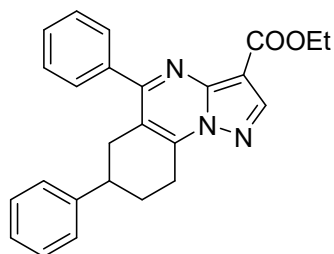

**ethyl 5,7-diphenyl-6,7,8,9-tetrahydropyrazolo[1,5-a]quinazoline-3-carboxylate (4an):**

Yield 98% (194.7 mg; petroleum ether/EtOAc = 8:1); light yellow solid; mp 180–182 °C;  $^1H$  NMR (400 MHz,  $CDCl_3$ ):  $\delta$  (ppm) 8.55 (s, 1H), 7.68–7.62 (m, 2H), 7.42–7.36 (m, 3H), 7.32–7.27 (m, 2H), 7.23–7.18 (m, 3H), 4.46–4.30 (m, 2H), 3.55 (dd,  $J = 19.6, 5.2$  Hz, 1H), 3.29–

3.17 (m, 1H), 3.02–2.92 (m, 2H), 2.91–2.84 (m, 1H), 2.38–2.30 (m, 1H), 2.16 (qd,  $J = 12.0$ , 6.0 Hz, 1H), 1.39 (t,  $J = 7.0$  Hz, 3H);  $^{13}\text{C}$  NMR (100 MHz,  $\text{CDCl}_3$ ):  $\delta$  (ppm) 162.5, 161.4, 146.6, 145.8, 145.0, 144.2, 137.9, 129.1, 128.9, 128.4, 128.0, 126.6, 116.9, 102.6, 59.8, 39.8, 34.5, 27.5, 25.4, 14.3; HRMS (ESI):  $m/z$   $[\text{M} + \text{H}]^+$  calcd for  $\text{C}_{25}\text{H}_{24}\text{N}_3\text{O}_2$ : 398.1863; found: 398.1861.

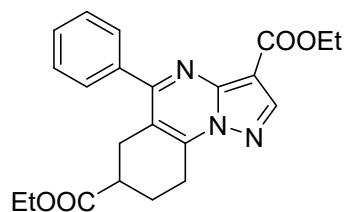

**diethyl 5-phenyl-6,7,8,9-tetrahydropyrazolo[1,5-*a*]quinazoline-3,7-dicarboxylate (4ao):**

Yield 98% (192.8 mg; petroleum ether/EtOAc = 5:1); yellow solid; mp 158–160 °C;  $^1\text{H}$  NMR (400 MHz,  $\text{CDCl}_3$ ):  $\delta$  (ppm) 8.54 (s, 1H), 7.70–7.65 (m, 2H), 7.51–7.45 (m, 3H), 4.47–4.33 (m, 2H), 4.21–4.09 (m, 2H), 3.55–3.46 (m, 1H), 3.28–3.09 (m, 2H), 2.98 (dd,  $J = 16.8$ , 4.4 Hz, 1H), 2.77–2.69 (m, 1H), 2.47–2.40 (m, 1H), 2.23–2.12 (m, 1H), 1.40 (t,  $J = 7.0$  Hz, 3H), 1.24 (t,  $J = 7.0$  Hz, 3H);  $^{13}\text{C}$  NMR (100 MHz,  $\text{CDCl}_3$ ):  $\delta$  (ppm) 173.8, 162.7, 161.7, 146.9, 145.9, 144.5, 137.9, 129.5, 129.1, 128.3, 115.6, 103.0, 60.9, 60.1, 39.1, 28.7, 24.0, 23.6, 14.4, 14.1; HRMS (ESI):  $m/z$   $[\text{M} + \text{Na}]^+$  calcd for  $\text{C}_{22}\text{H}_{23}\text{N}_3\text{NaO}_4$ : 416.1581; found: 416.1583.

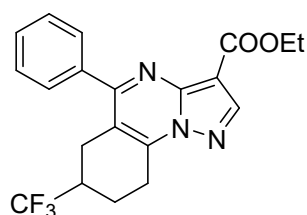

**ethyl 5-phenyl-7-(trifluoromethyl)-6,7,8,9-tetrahydropyrazolo[1,5-*a*]quinazoline-3-carboxylate (4ap):**

Yield 97% (188.8 mg; petroleum ether/EtOAc = 8:1); white solid; mp 165–167 °C;  $^1\text{H}$  NMR (400 MHz,  $\text{CDCl}_3$ ):  $\delta$  (ppm) 8.55 (s, 1H), 7.70–7.61 (m, 2H), 7.55–7.46 (m, 3H), 4.48–4.32 (m, 2H), 3.65 (dd,  $J = 19.2$ , 5.6 Hz, 1H), 3.25–3.13 (m, 1H), 2.97 (d,  $J = 7.6$  Hz, 2H), 2.52–2.39 (m, 2H), 1.99 (qd,  $J = 12.6$ , 6.2 Hz, 1H), 1.40 (t,  $J = 7.2$  Hz, 3H);  $^{13}\text{C}$  NMR (100 MHz,  $\text{CDCl}_3$ ):  $\delta$  (ppm) 162.6, 161.6, 147.1, 146.0, 144.2, 137.6, 129.7, 129.0, 128.5, 114.3, 103.2, 60.2, 38.8, 38.5, 25.7, 25.63, 25.60, 24.0, 20.1, 20.04, 20.01, 14.4; HRMS (ESI):  $m/z$   $[\text{M} + \text{Na}]^+$  calcd for  $\text{C}_{20}\text{H}_{18}\text{F}_3\text{N}_3\text{NaO}_2$ : 412.1243; found: 412.1243.

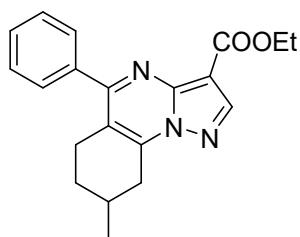

**ethyl 8-methyl-5-phenyl-6,7,8,9-tetrahydropyrazolo[1,5-*a*]quinazoline-3-carboxylate (4aq):**

Yield 90% (151 mg; petroleum ether/EtOAc = 8:1); light yellow solid; mp 144–146 °C; <sup>1</sup>H NMR (400 MHz, CDCl<sub>3</sub>): δ (ppm) 8.53 (s, 1H), 7.69–7.64 (m, 2H), 7.48–7.43 (m, 3H), 4.48–4.32 (m, 2H), 3.52 (dd, *J* = 19.2, 5.6 Hz, 1H), 2.93–2.84 (m, 1H) 2.82–2.67 (m, 2H), 2.17–2.07 (m, 1H), 1.99–1.92 (m, 1H), 1.40 (t, *J* = 7.2 Hz, 3H), 1.38–1.30 (m, 1H), 1.22 (d, *J* = 6.4 Hz, 3H); <sup>13</sup>C NMR (100 MHz, CDCl<sub>3</sub>): δ (ppm) 162.7, 161.7, 146.6, 146.0, 145.4, 138.3, 129.2, 129.0, 128.1, 117.1, 102.7, 60.0, 32.8, 30.5, 27.5, 26.6, 21.5, 14.4; HRMS (ESI): *m/z* [M + H]<sup>+</sup> calcd for C<sub>20</sub>H<sub>22</sub>N<sub>3</sub>O<sub>2</sub>: 336.1707; found: 336.1703.

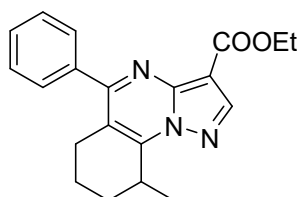

**ethyl 9-methyl-5-phenyl-6,7,8,9-tetrahydropyrazolo[1,5-*a*]quinazoline-3-carboxylate (4ar):**

Yield 87% (146 mg; petroleum ether/EtOAc = 8:1); light yellow solid; mp 167–169 °C; <sup>1</sup>H NMR (400 MHz, CDCl<sub>3</sub>): δ (ppm) 8.54 (s, 1H), 7.65–7.60 (m, 2H), 7.48–7.43 (m, 3H), 4.43–4.35 (m, 2H), 3.81–3.73 (m, 1H), 2.81–2.71 (m, 2H), 2.09–2.02 (m, 1H), 1.90 (dd, *J* = 6.8, 4.0 Hz, 1H), 1.87–1.80 (m, 2H), 1.51 (d, *J* = 6.8 Hz, 3H), 1.39 (t, *J* = 7.0 Hz, 3H); <sup>13</sup>C NMR (100 MHz, CDCl<sub>3</sub>): δ (ppm) 162.7, 162.2, 149.6, 146.4, 146.3, 138.5, 129.1, 128.9, 128.1, 116.8, 102.4, 59.9, 28.8, 28.7, 26.9, 18.2, 18.1, 14.4; HRMS (ESI): *m/z* [M + H]<sup>+</sup> calcd for C<sub>20</sub>H<sub>22</sub>N<sub>3</sub>O<sub>2</sub>: 336.1707; found: 336.1715.

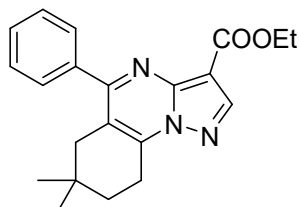

**ethyl 7,7-dimethyl-5-phenyl-6,7,8,9-tetrahydropyrazolo[1,5-*a*]quinazoline-3-carboxylate (4as):**

Yield 99% (173 mg; petroleum ether/EtOAc = 8:1); light yellow solid; mp 175–177 °C; <sup>1</sup>H NMR (400 MHz, CDCl<sub>3</sub>): δ (ppm) 8.55 (s, 1H), 7.69–7.64 (m, 2H), 7.51–7.45 (m, 3H), 4.40 (q, *J* = 7.2 Hz, 2H), 3.27 (t, *J* = 6.8 Hz, 2H), 2.60 (s, 2H), 1.81 (t, *J* = 6.8 Hz, 2H), 1.41 (t, *J* = 7.2 Hz, 3H), 0.98 (s, 6H); <sup>13</sup>C NMR (100 MHz, CDCl<sub>3</sub>): δ (ppm) 162.7, 162.0, 146.7, 145.8, 144.9, 138.2, 129.2, 129.1, 128.1, 116.3, 102.7, 60.0, 39.9, 33.2, 29.4, 27.4, 22.6, 14.4; HRMS (ESI): *m/z* [M + H]<sup>+</sup> calcd for C<sub>21</sub>H<sub>24</sub>N<sub>3</sub>O<sub>2</sub>: 350.1863; found: 350.1864.



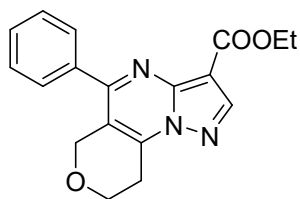

**ethyl 5-phenyl-8,9-dihydro-6H-pyrano[3,4-*e*]pyrazolo[1,5-*a*]pyrimidine-3-carboxylate (4at):**

Yield 99% (160 mg; petroleum ether/EtOAc = 5:1); light yellow solid; mp 224–226 °C; <sup>1</sup>H NMR (400 MHz, CDCl<sub>3</sub>): δ (ppm) 8.57 (s, 1H), 7.66–7.61 (m, 2H), 7.53–7.46 (m, 3H), 4.80 (s, 2H), 4.41 (q, *J* = 7.2 Hz, 2H), 4.23 (t, *J* = 5.8 Hz, 2H), 3.36 (t, *J* = 5.8 Hz, 2H), 1.42 (t, *J* = 7.2 Hz, 3H); <sup>13</sup>C NMR (100 MHz, CDCl<sub>3</sub>): δ (ppm) 162.6, 158.9, 147.3, 146.3, 142.7, 137.1, 130.0, 128.7, 128.5, 116.0, 103.3, 65.4, 63.7, 60.2, 24.4, 14.4; HRMS (ESI): *m/z* [M + Na]<sup>+</sup> calcd for C<sub>18</sub>H<sub>17</sub>N<sub>3</sub>NaO<sub>3</sub>: 346.1162; found: 346.1164.

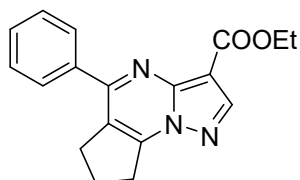

**ethyl 5-phenyl-7,8-dihydro-6H-cyclopenta[*e*]pyrazolo[1,5-*a*]pyrimidine-3-carboxylate (4au):**

Yield 97% (149 mg; petroleum ether/EtOAc = 8:1); white solid; mp 148–150 °C; <sup>1</sup>H NMR (400 MHz, CDCl<sub>3</sub>): δ (ppm) 8.59 (s, 1H), 8.07–8.00 (m, 2H), 7.54–7.46 (m, 3H), 4.43 (q, *J* = 7.2 Hz, 2H), 3.49 (t, *J* = 7.8 Hz, 2H), 3.37 (t, *J* = 7.4 Hz, 2H), 2.43–2.34 (m, 2H), 1.45 (t, *J* = 7.2 Hz, 3H); <sup>13</sup>C NMR (100 MHz, CDCl<sub>3</sub>): δ (ppm) 162.9, 157.3, 151.7, 148.0, 147.5, 137.8, 130.2, 128.9, 128.5, 122.4, 102.5, 60.1, 32.2, 29.9, 22.9, 14.5; HRMS (ESI): *m/z* [M + H]<sup>+</sup> calcd for C<sub>18</sub>H<sub>18</sub>N<sub>3</sub>O<sub>2</sub>: 308.1394; found: 308.1393.

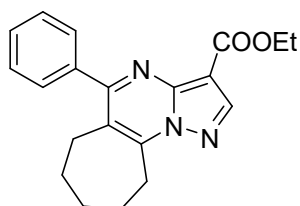

**ethyl 5-phenyl-7,8,9,10-tetrahydro-6H-cyclohepta[*e*]pyrazolo[1,5-*a*]pyrimidine-3-carboxylate (4av):**

Yield 98% (164.3 mg; petroleum ether/EtOAc = 10:1); light yellow solid; mp 131–133 °C; <sup>1</sup>H NMR (400 MHz, CDCl<sub>3</sub>): δ (ppm) 8.54 (s, 1H), 7.62–7.57 (m, 2H), 7.51–7.45 (m, 3H), 4.39 (q, *J* = 7.2 Hz, 2H), 3.66 (t, *J* = 5.0 Hz, 2H), 2.98–2.93 (m, 2H), 2.01–1.95 (m, 2H), 1.91–1.84 (m, 2H), 1.75–1.68 (m, 2H), 1.40 (t, *J* = 7.2 Hz, 3H); <sup>13</sup>C NMR (100 MHz, CDCl<sub>3</sub>): δ (ppm) 162.8, 161.9, 152.0, 146.8, 146.1, 138.9, 129.3, 129.1, 128.2, 122.7, 102.5, 60.0, 31.8, 29.3, 27.9, 26.9, 24.7, 14.5; HRMS (ESI): *m/z* [M + H]<sup>+</sup> calcd for C<sub>20</sub>H<sub>22</sub>N<sub>3</sub>O<sub>2</sub>: 336.1707; found: 336.1706.

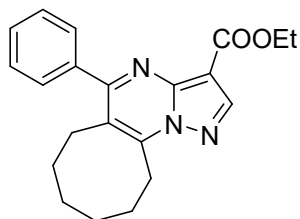

**ethyl 5-phenyl-6,7,8,9,10,11-hexahydrocycloocta[e]pyrazolo[1,5-a]pyrimidine-3-carboxylate (4aw):**

Yield 96% (167.7 mg; petroleum ether/EtOAc = 10:1); light yellow solid; mp 160–162 °C; <sup>1</sup>H NMR (400 MHz, CDCl<sub>3</sub>): δ (ppm) 8.55 (s, 1H), 7.58–7.54 (m, 2H), 7.48–7.44 (m, 3H), 4.38 (q, *J* = 7.2 Hz, 2H), 3.51 (t, *J* = 6.2 Hz, 2H), 2.89 (t, *J* = 6.2 Hz, 2H), 2.00–1.94 (m, 2H), 1.63–1.56 (m, 2H), 1.52–1.45 (m, 2H), 1.44–1.37 (m, 5H); <sup>13</sup>C NMR (100 MHz, CDCl<sub>3</sub>): δ (ppm) 162.72, 162.65, 149.1, 146.9, 146.1, 139.1, 128.8, 128.7, 128.1, 120.5, 102.4, 60.0, 31.1, 27.1, 26.6, 26.4, 25.7, 14.5; HRMS (ESI): *m/z* [M + H]<sup>+</sup> calcd for C<sub>21</sub>H<sub>24</sub>N<sub>3</sub>O<sub>2</sub>: 350.1863; found: 350.1862.

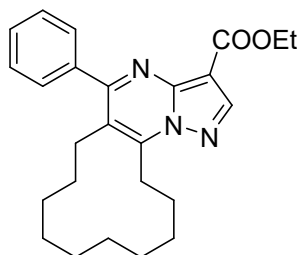

**ethyl 5-phenyl-6,7,8,9,10,11,12,13,14,15-decahydrocyclododeca[e]pyrazolo[1,5-a]pyrimidine-3-carboxylate (4ax):**

Yield 92% (186.5 mg; petroleum ether/EtOAc = 8:1); white solid; mp 172–174 °C; <sup>1</sup>H NMR (400 MHz, CDCl<sub>3</sub>): δ (ppm) 8.53 (s, 1H), 7.59–7.54 (m, 2H), 7.48–7.41 (m, 3H), 4.38 (q, *J* = 7.2 Hz, 2H), 3.35 (t, *J* = 7.6 Hz, 2H), 2.85–2.75 (m, 2H), 2.03 (d, *J* = 4.0 Hz, 2H), 1.64–1.57 (m, 2H), 1.56–1.51 (m, 2H), 1.45 (d, *J* = 6.0 Hz, 4H), 1.42–1.33 (m, 7H), 1.28 (d, *J* = 4.0 Hz, 2H); <sup>13</sup>C NMR (100 MHz, CDCl<sub>3</sub>): δ (ppm) 163.3, 162.5, 148.7, 146.5, 145.8, 139.5, 128.7, 128.3, 128.0, 120.8, 102.2, 59.8, 27.9, 27.2, 26.7, 26.3, 26.1, 25.9, 25.7, 24.1, 22.4, 21.9, 14.3; HRMS (ESI): *m/z* [M + Na]<sup>+</sup> calcd for C<sub>25</sub>H<sub>31</sub>N<sub>3</sub>NaO<sub>2</sub>: 428.2308; found: 428.2309.

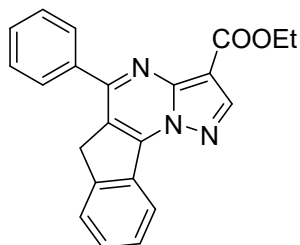

**ethyl 5-phenyl-6*H*-indeno[2,1-*e*]pyrazolo[1,5-*a*]pyrimidine-3-carboxylate (4ay):**

Yield 94% (167 mg; petroleum ether/EtOAc = 8:1); yellow solid; mp 172–175 °C; <sup>1</sup>H NMR (400 MHz, CDCl<sub>3</sub>): δ (ppm) 8.65–8.58 (m, 2H), 8.14–8.09 (m, 2H), 7.57–7.52 (m, 1H), 7.51–7.43 (m, 5H), 4.45 (q, *J* = 7.0 Hz, 2H), 4.15 (d, *J* = 2.8 Hz, 2H), 1.47 (t, *J* = 7.0 Hz, 3H); <sup>13</sup>C

NMR (100 MHz, CDCl<sub>3</sub>):  $\delta$  (ppm) 162.9, 156.0, 148.0, 147.8, 146.3, 144.3, 137.5, 133.0, 130.7, 130.2, 128.8, 128.6, 127.7, 125.3, 124.5, 120.5, 102.1, 60.0, 36.5, 14.5; HRMS (ESI):  $m/z$  [M + Na]<sup>+</sup> calcd for C<sub>22</sub>H<sub>17</sub>N<sub>3</sub>NaO<sub>2</sub>: 378.1213; found: 378.1213.

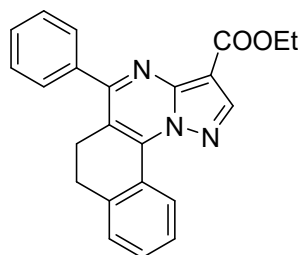

**ethyl 5-phenyl-6,7-dihydrobenzo[h]pyrazolo[1,5-a]quinazoline-3-carboxylate (4az):**

Yield 94% (173.6 mg; petroleum ether/EtOAc = 10:1); light yellow solid; mp 130–132 °C; <sup>1</sup>H NMR (400 MHz, CDCl<sub>3</sub>):  $\delta$  (ppm) 9.23–9.18 (m, 1H), 8.62 (s, 1H), 7.74–7.70 (m, 2H), 7.51–7.45 (m, 5H), 7.35–7.31 (m, 1H), 4.42 (q,  $J$  = 7.2 Hz, 2H), 3.02 (t,  $J$  = 7.0 Hz, 2H), 2.83 (t,  $J$  = 7.0 Hz, 2H), 1.43 (t,  $J$  = 7.2 Hz, 3H); <sup>13</sup>C NMR (100 MHz, CDCl<sub>3</sub>):  $\delta$  (ppm) 162.7, 160.8, 147.7, 146.9, 141.4, 140.2, 138.1, 131.4, 129.54, 129.49, 129.3, 128.2, 127.6, 126.7, 126.2, 117.5, 102.3, 60.0, 28.6, 25.4, 14.4; HRMS (ESI):  $m/z$  [M + Na]<sup>+</sup> calcd for C<sub>23</sub>H<sub>19</sub>N<sub>3</sub>NaO<sub>2</sub>: 392.1369; found: 392.1368.

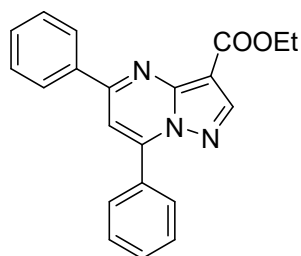

**ethyl 5,7-diphenylpyrazolo[1,5-a]pyrimidine-3-carboxylate (4ba):**

Yield 96% (164.8 mg; petroleum ether/EtOAc = 10:1); yellow solid; mp 92–95 °C; <sup>1</sup>H NMR (400 MHz, CDCl<sub>3</sub>):  $\delta$  (ppm) 8.60 (s, 1H), 8.29–8.25 (m, 2H), 8.05–8.00 (m, 2H), 7.63–7.58 (m, 3H), 7.54–7.51 (m, 4H), 4.47 (q,  $J$  = 7.2 Hz, 2H), 1.48 (t,  $J$  = 7.2 Hz, 3H); <sup>13</sup>C NMR (100 MHz, CDCl<sub>3</sub>):  $\delta$  (ppm) 162.8, 158.9, 148.8, 147.8, 147.7, 136.5, 131.3, 131.1, 130.7, 129.4, 128.9, 128.8, 127.6, 106.3, 103.0, 60.2, 14.5; HRMS (ESI):  $m/z$  [M + H]<sup>+</sup> calcd for C<sub>21</sub>H<sub>18</sub>N<sub>3</sub>O<sub>2</sub>: 344.1394; found: 344.1393.

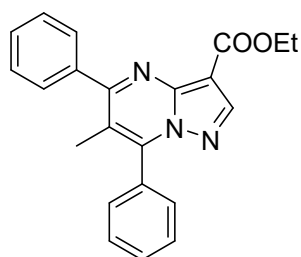

**ethyl 6-methyl-5,7-diphenylpyrazolo[1,5-a]pyrimidine-3-carboxylate (4bb):**

Yield 95% (169.8 mg; petroleum ether/EtOAc = 8:1); yellow solid; mp 136–138 °C; <sup>1</sup>H NMR (400 MHz, CDCl<sub>3</sub>): δ (ppm) 8.47 (s, 1H), 7.75–7.69 (m, 2H), 7.65–7.57 (m, 3H), 7.55–7.52 (m, 2H), 7.51–7.46 (m, 3H), 4.40 (q, *J* = 7.2 Hz, 2H), 2.22 (s, 3H), 1.40 (t, *J* = 7.2 Hz, 3H); <sup>13</sup>C NMR (100 MHz, CDCl<sub>3</sub>): δ (ppm) 163.4, 162.6, 147.1, 146.6, 146.3, 138.8, 130.3, 130.2, 129.3, 129.2, 129.1, 128.9, 128.2, 116.2, 102.6, 60.0, 17.1, 14.4; HRMS (ESI): *m/z* [M + H]<sup>+</sup> calcd for C<sub>22</sub>H<sub>20</sub>N<sub>3</sub>O<sub>2</sub>: 358.1550; found: 358.1547.

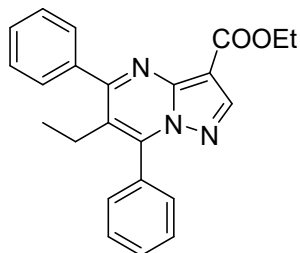

**ethyl 6-ethyl-5,7-diphenylpyrazolo[1,5-*a*]pyrimidine-3-carboxylate (4bc):**

Yield 96% (178.3 mg; petroleum ether/EtOAc = 8:1); white solid; mp 136–138 °C; <sup>1</sup>H NMR (400 MHz, CDCl<sub>3</sub>): δ (ppm) 8.48 (s, 1H), 7.69–7.65 (m, 2H), 7.63–7.57 (m, 3H), 7.52–7.45 (m, 5H), 4.39 (q, *J* = 7.2 Hz, 2H), 2.67 (q, *J* = 7.6 Hz, 2H), 1.38 (t, *J* = 7.0 Hz, 3H), 0.78 (t, *J* = 7.2 Hz, 3H); <sup>13</sup>C NMR (100 MHz, CDCl<sub>3</sub>): δ (ppm) 163.5, 162.4, 146.9, 146.1, 138.8, 129.92, 129.90, 128.80, 128.76, 128.7, 128.4, 128.0, 122.6, 102.4, 59.8, 21.5, 14.4, 14.2; HRMS (ESI): *m/z* [M + H]<sup>+</sup> calcd for C<sub>23</sub>H<sub>22</sub>N<sub>3</sub>O<sub>2</sub>: 372.1707; found: 372.1706.

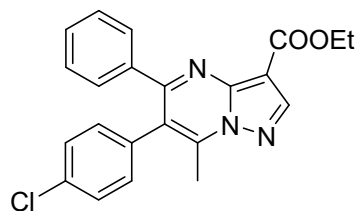

**ethyl 6-(4-chlorophenyl)-7-methyl-5-phenylpyrazolo[1,5-*a*]pyrimidine-3-carboxylate (4bd):**

Yield 56% (109.7 mg; petroleum ether/EtOAc = 10:1); yellow solid; mp 185–187 °C; <sup>1</sup>H NMR (400 MHz, CDCl<sub>3</sub>): δ (ppm) 8.62 (s, 1H), 7.40–7.36 (m, 2H), 7.36–7.32 (m, 2H), 7.30–7.19 (m, 3H), 7.12–7.08 (m, 2H), 4.43 (q, *J* = 7.2 Hz, 2H), 2.72 (s, 3H), 1.43 (t, *J* = 7.2 Hz, 3H); <sup>13</sup>C NMR (100 MHz, CDCl<sub>3</sub>): δ (ppm) 162.6, 160.2, 147.5, 146.5, 145.7, 138.1, 134.2, 133.6, 132.2, 130.0, 129.1, 128.9, 127.8, 121.3, 103.2, 60.2, 15.6, 14.4; HRMS (ESI): *m/z* [M + Na]<sup>+</sup> calcd for C<sub>22</sub>H<sub>18</sub>ClN<sub>3</sub>NaO<sub>2</sub>: 414.0980; found: 414.0976.

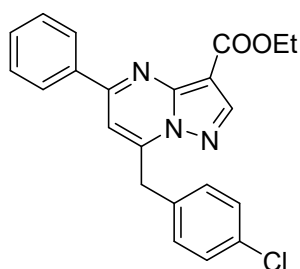

**ethyl 7-(4-chlorobenzyl)-5-phenylpyrazolo[1,5-*a*]pyrimidine-3-carboxylate (4bd')**

Yield 42% (82.3 mg; petroleum ether/EtOAc = 10:1); light yellow solid; mp 128–131 °C; <sup>1</sup>H NMR (400 MHz, CDCl<sub>3</sub>): δ (ppm) 8.58 (s, 1H), 8.12–8.07 (m, 2H), 7.50–7.44 (m, 3H), 7.37–7.29 (m, 4H), 7.04 (s, 1H), 4.53 (s, 2H), 4.44 (q, *J* = 7.2 Hz, 2H), 1.46 (t, *J* = 7.2 Hz, 3H); <sup>13</sup>C NMR (100 MHz, CDCl<sub>3</sub>): δ (ppm) 162.7, 158.7, 149.1, 147.9, 147.5, 136.4, 133.6, 132.7, 131.0, 130.9, 129.1, 128.9, 127.6, 105.6, 103.2, 60.2, 35.9, 14.5; HRMS (ESI): *m/z* [M + Na]<sup>+</sup> calcd for C<sub>22</sub>H<sub>18</sub>ClN<sub>3</sub>NaO<sub>2</sub>: 414.0980; found: 414.0979.

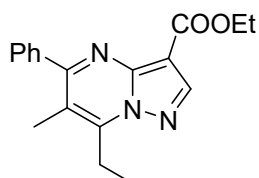

**ethyl 7-ethyl-6-methyl-5-phenylpyrazolo[1,5-*a*]pyrimidine-3-carboxylate (4be)**

Yield 95% (146.8 mg; petroleum ether/EtOAc = 5:1); white solid; mp 118–120 °C; <sup>1</sup>H NMR (400 MHz, CDCl<sub>3</sub>): δ (ppm) 8.54 (s, 1H), 7.65–7.60 (m, 2H), 7.50–7.44 (m, 3H), 4.39 (q, *J* = 7.2 Hz, 2H), 3.36 (q, *J* = 7.6 Hz, 2H), 2.39 (s, 3H), 1.42–1.36 (m, 6H); <sup>13</sup>C NMR (100 MHz, CDCl<sub>3</sub>): δ (ppm) 162.8, 162.7, 149.9, 146.8, 146.1, 139.0, 129.2, 129.1, 128.1, 114.7, 102.4, 60.0, 21.5, 15.1, 14.4, 10.4; HRMS (ESI): *m/z* [M + H]<sup>+</sup> calcd for C<sub>18</sub>H<sub>20</sub>N<sub>3</sub>O<sub>2</sub>: 310.1550; found: 310.1552.

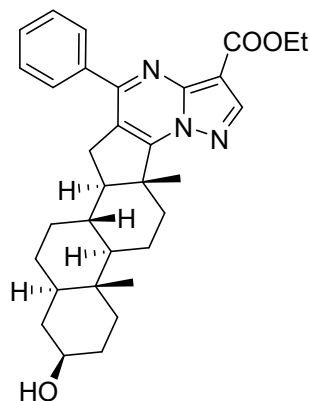

**ethyl (2*aR*,4*R*,6*aR*,6*bR*,8*aR*,15*aR*,15*bS*)-4-hydroxy-6*a*,8*a*-dimethyl-14-phenyl-2,2*a*,3,4,5,6,6*a*,6*b*,7,8,8*a*,15,15*a*,15*b*-tetradecahydro-1*H*-naphtho[2',1':4,5]indeno[2,1-*e*]pyrazolo[1,5-*a*]pyrimidine-12-carboxylate (4bf):**

Yield 80% (205.5 mg; petroleum ether/EtOAc = 5:1); light yellow solid; mp 147–150 °C; <sup>1</sup>H NMR (400 MHz, CDCl<sub>3</sub>): δ (ppm) 8.56 (s, 1H), 8.00–7.96 (m, 2H), 7.53–7.48 (m, 3H), 4.49–4.36 (m, 2H), 3.64–3.56 (m, 1H), 3.02 (dd, *J* = 14.4, 5.6 Hz, 1H), 2.93–2.85 (m, 2H), 1.90–1.72 (m, 8H), 1.64–1.57 (m, 2H), 1.43 (t, *J* = 7.2 Hz, 4H), 1.40–1.33 (m, 3H), 1.30 (s, 3H), 1.20–1.14 (m, 1H), 1.07–0.97 (m, 2H), 0.92 (s, 3H), 0.87–0.81 (m, 1H); <sup>13</sup>C NMR (100 MHz, CDCl<sub>3</sub>): δ (ppm) 163.0, 159.0, 157.7, 148.2, 147.9, 137.8, 130.1, 129.0, 128.5, 120.6, 101.9, 71.1, 60.0, 56.3, 54.3, 47.2, 44.9, 38.0, 36.6, 35.7, 33.8, 33.7, 31.7, 31.5, 31.4, 28.3, 20.6, 15.0, 14.5, 12.3; HRMS (ESI): *m/z* [M + H]<sup>+</sup> calcd for C<sub>32</sub>H<sub>40</sub>N<sub>3</sub>O<sub>3</sub>: 514.3064; found: 514.3071.

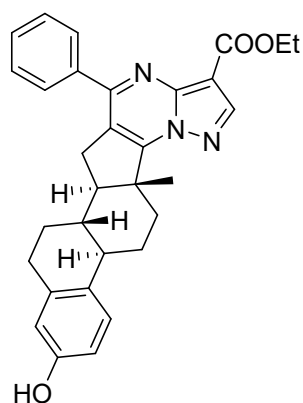

**ethyl (6*R*,8*aR*,15*aR*,15*bS*)-4-hydroxy-8*a*-methyl-14-phenyl-2,6*b*,7,8,8*a*,15,15*a*,15*b*-octahydro-1*H*-naphtho[2',1':4,5]indeno[2,1-*e*]pyrazolo[1,5-*a*]pyrimidine-12-carboxylate (4*bg*):**

Yield 81% (200 mg; petroleum ether/EtOAc = 5:1); white solid; mp 305–308 °C; <sup>1</sup>H NMR (400 MHz, CDCl<sub>3</sub>): δ (ppm) 8.59 (s, 1H), 8.03–7.97 (m, 2H), 7.54–7.48 (m, 3H), 7.17 (d, *J* = 8.4 Hz, 1H), 6.68 (dd, *J* = 8.4, 2.4 Hz, 1H), 6.61 (d, *J* = 2.4 Hz, 1H), 5.23 (s, 1H), 4.50–4.37 (m, 2H), 3.14 (dd, *J* = 14.4, 6.4 Hz, 1H), 3.02 (dd, *J* = 14.4, 12.0 Hz, 2H), 2.95–2.83 (m, 2H), 2.55–2.49 (m, 1H), 2.42–2.34 (m, 1H), 2.10–2.00 (m, 3H), 1.92–1.77 (m, 2H), 1.55–1.48 (m, 1H), 1.44 (t, *J* = 7.2 Hz, 3H), 1.35 (s, 3H); <sup>13</sup>C NMR (100 MHz, CDCl<sub>3</sub>): δ (ppm) 163.2, 159.0, 157.9, 153.7, 148.2, 148.0, 137.8, 137.7, 131.7, 130.1, 129.0, 128.5, 126.2, 120.6, 115.3, 112.9, 102.0, 60.1, 55.5, 47.4, 43.8, 36.9, 33.7, 31.5, 29.3, 27.3, 25.9, 15.1, 14.5; HRMS (ESI): *m/z* [M + H]<sup>+</sup> calcd for C<sub>31</sub>H<sub>32</sub>N<sub>3</sub>O<sub>3</sub>: 494.2438; found: 494.2431.

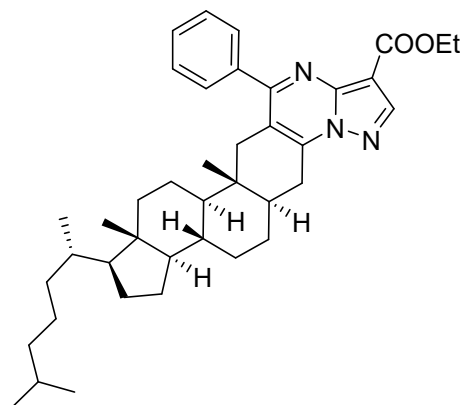

**ethyl (1*S*,3*aS*,3*bS*,5*aR*,13*aR*,13*bS*,15*aS*)-3*b*,13*a*,15*a*-trimethyl-1-((*S*)-6-methylheptan-2-yl)-12-phenyl-2,3,3*a*,3*b*,4,5,5*a*,6,13,13*a*,13*b*,14,15,15*a*-tetradecahydro-1*H*-cyclopenta[5,6]naphtho[1,2-*g*]pyrazolo[1,5-*a*]quinazoline-10-carboxylate (4*bh*):**

Yield 90% (274.5 mg; petroleum ether/EtOAc = 8:1); brown solid; mp 104–107 °C; <sup>1</sup>H NMR (400 MHz, CDCl<sub>3</sub>): δ (ppm) 8.54 (s, 1H), 7.71–7.64 (m, 2H), 7.51–7.43 (m, 3H), 4.49–4.31 (m, 2H), 3.36 (dd, *J* = 14.4, 5.2 Hz, 1H), 2.80–2.70 (m, 2H), 2.54 (d, *J* = 16.0 Hz, 1H), 1.97 (d, *J* = 12.4 Hz, 1H), 1.87–1.73 (m, 4H), 1.64–1.56 (m, 1H), 1.57–1.48 (m, 1H), 1.44–1.30 (m, 10H), 1.20–0.91 (m, 10H), 0.91–0.83 (m, 10H), 0.68 (s, 3H), 0.63 (s, 3H); <sup>13</sup>C NMR (100 MHz, CDCl<sub>3</sub>): δ (ppm) 162.5, 161.9, 146.6, 145.6, 144.5, 138.1, 129.1, 129.0, 127.9, 116.1, 102.5, 59.8, 56.1, 56.0, 53.2, 42.1, 40.4, 39.8, 39.5, 39.3, 35.9, 35.5, 35.1, 31.1, 29.1, 28.0,

27.8, 24.0, 23.6, 22.6, 22.4, 20.9, 18.4, 14.3, 11.7, 11.1; HRMS (ESI):  $m/z$   $[M + H]^+$  calcd for  $C_{40}H_{56}N_3O_2$ : 610.4367; found: 610.4355.

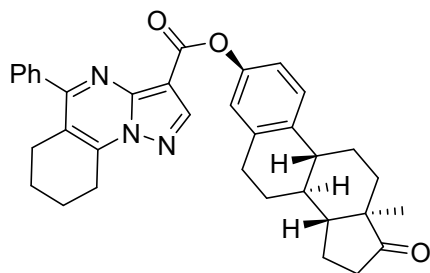

**(8*S*,9*R*,13*R*,14*R*)-13-methyl-17-oxo-7,8,9,11,12,13,14,15,16,17-decahydro-6*H*-cyclopenta[*a*]phenanthren-3-yl 5-phenyl-6,7,8,9-tetrahydropyrazolo[1,5-*a*]quinazoline-3-carboxylate (5):**

Yield 83% (90.6 mg; petroleum ether/EtOAc = 5:1); white solid; mp 112–114 °C;  $^1H$  NMR (400 MHz,  $CDCl_3$ ):  $\delta$  (ppm) 8.67 (s, 1H), 7.69–7.64 (m, 2H), 7.45–7.41 (m, 3H), 7.29 (d,  $J$  = 8.4 Hz, 1H), 7.05–6.99 (m, 2H), 3.28 (t,  $J$  = 6.4 Hz, 2H), 2.94–2.88 (m, 2H), 2.81 (t,  $J$  = 6.0 Hz, 2H), 2.49 (dd,  $J$  = 18.8, 8.8 Hz, 1H), 2.44–2.38 (m, 1H), 2.32–2.24 (m, 1H), 2.19–2.10 (m, 1H), 2.08–1.98 (m, 4H), 1.97–1.93 (m, 1H), 1.84–1.77 (m, 2H), 1.66–1.53 (m, 3H), 1.53–1.41 (m, 3H), 0.91 (s, 3H);  $^{13}C$  NMR (100 MHz,  $CDCl_3$ ):  $\delta$  (ppm) 220.7, 162.0, 161.0, 148.6, 147.0, 146.2, 145.8, 138.0, 137.5, 136.7, 129.3, 129.1, 128.0, 126.0, 121.9, 119.0, 117.9, 101.7, 50.2, 47.8, 44.0, 37.8, 35.7, 31.4, 29.2, 26.7, 26.2, 25.6, 24.8, 22.2, 21.4, 20.8, 13.7; HRMS (ESI):  $m/z$   $[M + H]^+$  calcd for  $C_{35}H_{36}N_3O_3$ : 546.2751; found: 546.2750.

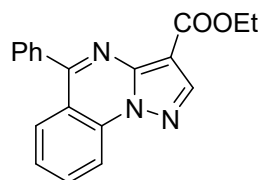

**ethyl 5-phenylpyrazolo[1,5-*a*]quinazoline-3-carboxylate (6):**

Yield 92% (146 mg; petroleum ether/EtOAc = 8:1); light yellow solid; mp 170–172 °C;  $^1H$  NMR (400 MHz,  $CDCl_3$ ):  $\delta$  (ppm) 8.60 (d,  $J$  = 8.4 Hz, 1H), 8.54 (s, 1H), 8.14 (dd,  $J$  = 8.4, 0.8 Hz, 1H), 7.98–7.93 (m, 1H), 7.86–7.81 (m, 2H), 7.59–7.53 (m, 4H), 4.43 (q,  $J$  = 7.2 Hz, 2H), 1.43 (t,  $J$  = 7.2 Hz, 3H);  $^{13}C$  NMR (100 MHz,  $CDCl_3$ ):  $\delta$  (ppm) 163.0, 162.7, 145.3, 144.3, 137.2, 136.5, 134.4, 130.2, 130.0, 129.3, 128.5, 125.8, 117.5, 115.6, 105.5, 60.3, 14.4; HRMS (ESI):  $m/z$   $[M + H]^+$  calcd for  $C_{19}H_{16}N_3O_2$ : 318.1237; found: 318.1235.

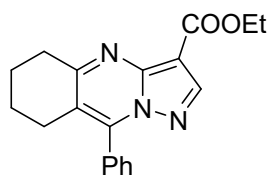

**ethyl 9-phenyl-5,6,7,8-tetrahydropyrazolo[5,1-*b*]quinazoline-3-carboxylate (8):**

Yield 51% (82 mg; petroleum ether/EtOAc = 5:1); yellow solid; mp 162–164 °C;  $^1H$  NMR (400 MHz,  $CDCl_3$ ):  $\delta$  (ppm) 8.39 (s, 1H), 7.62–7.56 (m, 3H), 7.48–7.44 (m, 2H), 4.41 (q,  $J$  =

7.2 Hz, 2H), 3.19 (t,  $J = 6.6$  Hz, 2H), 2.62 (t,  $J = 6.4$  Hz, 2H), 1.98–1.91 (m, 2H), 1.81–1.76 (m, 2H), 1.41 (t,  $J = 7.2$  Hz, 3H);  $^{13}\text{C}$  NMR (100 MHz,  $\text{CDCl}_3$ ):  $\delta$  (ppm) 164.1, 162.8, 146.9, 144.9, 130.3, 129.6, 129.0(3), 128.9(8), 118.1, 101.2, 60.0, 34.0, 26.0, 22.4, 22.1, 14.5; HRMS (ESI):  $m/z$   $[\text{M} + \text{Na}]^+$  calcd for  $\text{C}_{19}\text{H}_{19}\text{N}_3\text{NaO}_2$ : 344.1369; found: 344.1355.



## 6. Crystallographic data and molecular structure of 4am

The crystal of **4am** for X-ray diffraction study has been obtained through the dissolving of compound in  $\text{CHCl}_3$ , followed by slow evaporation of the solvent at room temperature. The crystal was kept at 296(2) during data collection. CCDC 2252849 contains the supplementary crystallographic data for this paper. This data can be obtained free of charge from the Cambridge Crystallographic Data Centre via [www.ccdc.cam.ac.uk/data\\_request/cif](http://www.ccdc.cam.ac.uk/data_request/cif).

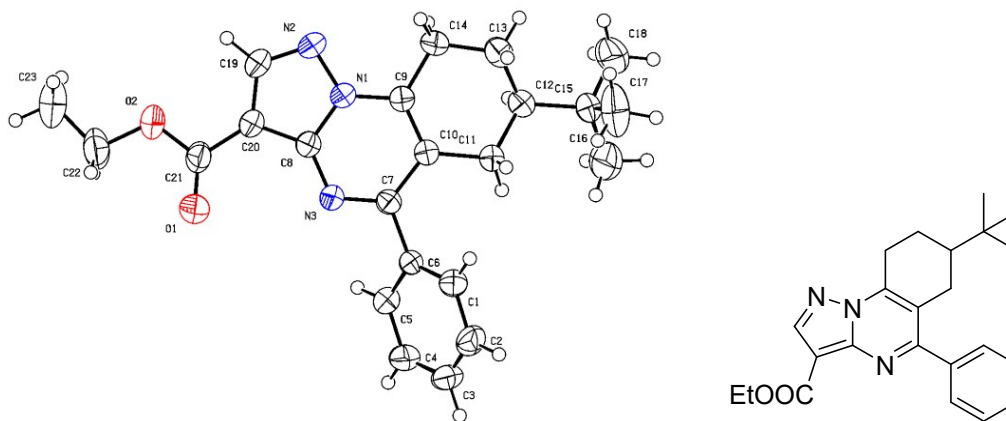

**Figure S1.** X-ray crystal structure of **4am**; the ellipsoids depicted at the 30% probability level.

|                      |                                                  |                           |                                 |                                              |
|----------------------|--------------------------------------------------|---------------------------|---------------------------------|----------------------------------------------|
| Empirical formula    | $\text{C}_{23}\text{H}_{27}\text{N}_3\text{O}_2$ |                           | Absorption coefficient          | $0.078 \text{ mm}^{-1}$                      |
| Formula weight       | 377.47                                           |                           | F(000)                          | 404.0                                        |
| Temperature          | 296(2) K                                         |                           | Crystal size                    | $0.18 \times 0.16 \times 0.15 \text{ mm}^3$  |
| Crystal system       | triclinic                                        |                           | Theta range for data collection | 40184 to 54.938°                             |
| Space group          | P-1                                              |                           | Reflections collected           | 6262                                         |
| Unit cell dimensions | a =<br>10.097(4) Å                               | $\alpha =$<br>108.552(5)° | Independent reflections         | 4579 [R(int) = 0.0198,<br>R(sigma) = 0.0446] |
|                      | b =<br>10.892(4) Å                               | $\beta =$<br>110.723(4)°  | Data / restraints / parameters  | 4579/0/257                                   |
|                      | c =<br>11.599(4) Å                               | $\gamma =$<br>103.618(5)° | Goodness-of-fit on $F^2$        | 1.089                                        |
| Volume               | 1040.2(7) Å <sup>3</sup>                         |                           | Final R indices [I > 2sigma(I)] | $R_1 = 0.0746$ , $wR_2 = 0.2475$             |
| Z                    | 2                                                |                           | R indices (all data)            | $R_1 = 0.1018$ , $wR_2 = 0.2829$             |
| Density (calculated) | 1.205 g/cm <sup>3</sup>                          |                           | Largest diff. peak and hole     | 0.61/-0.33 e.Å <sup>-3</sup>                 |

## 7. NMR spectra

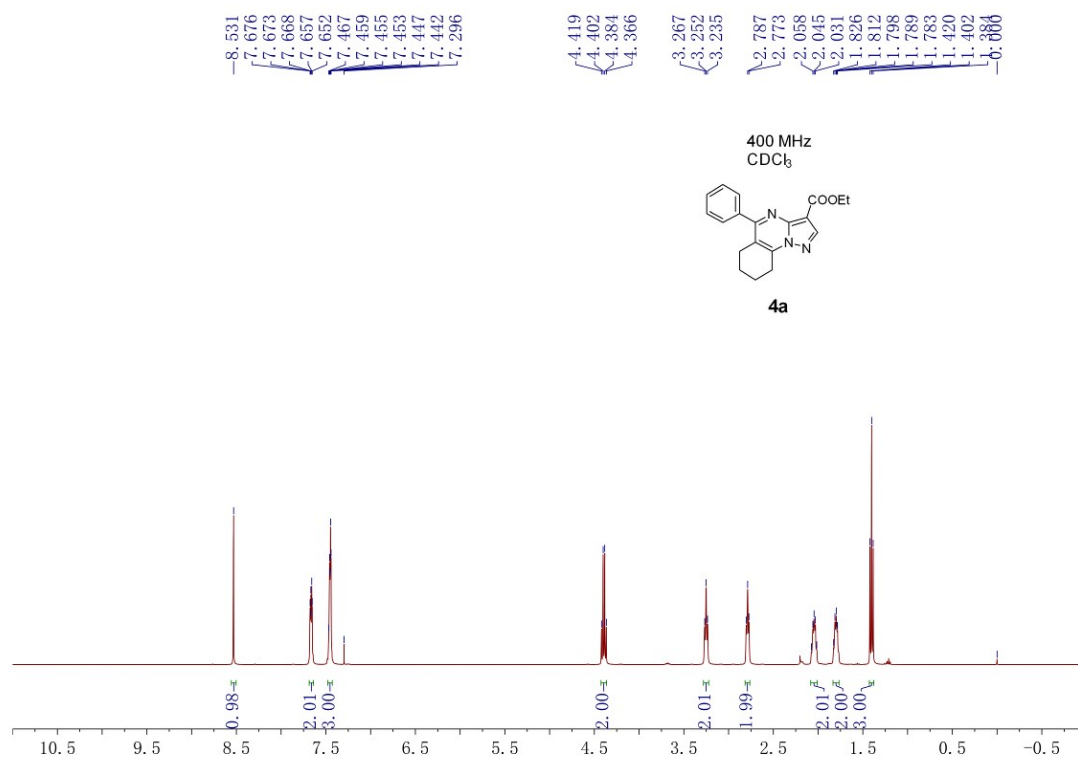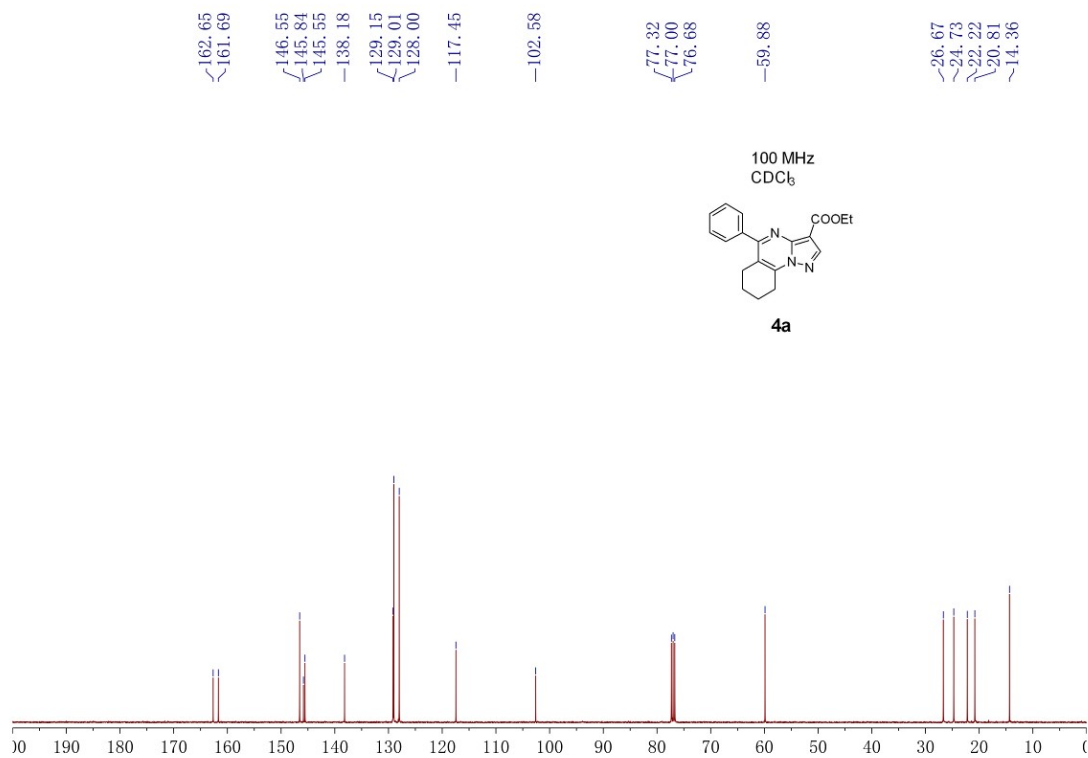

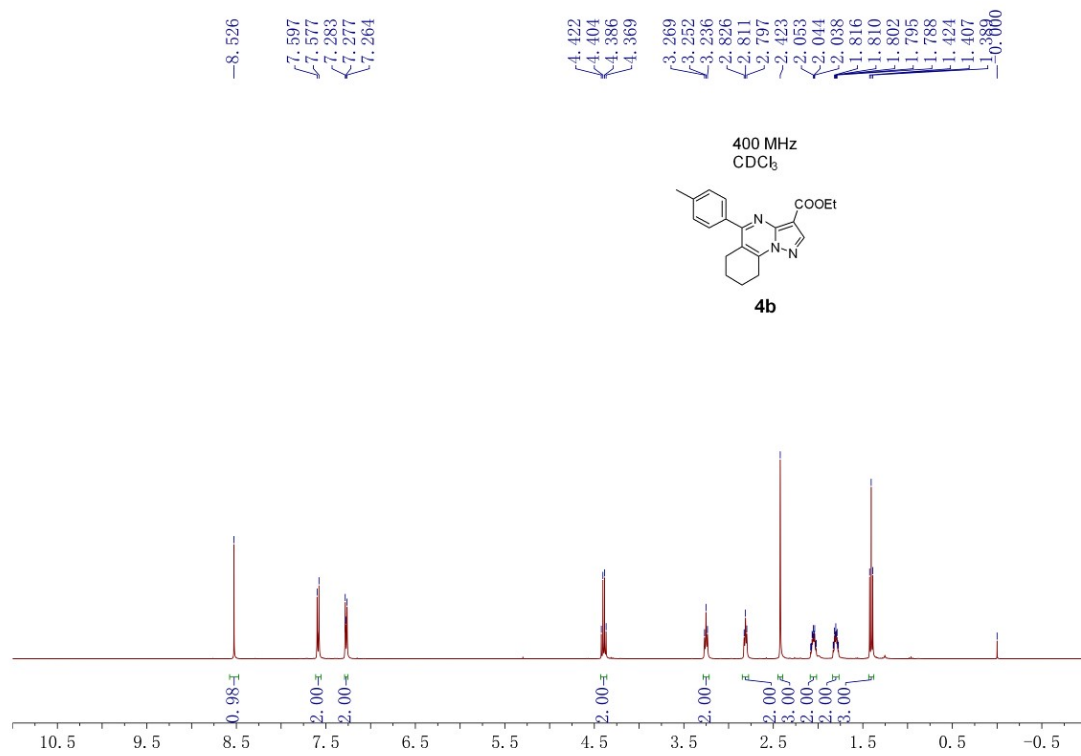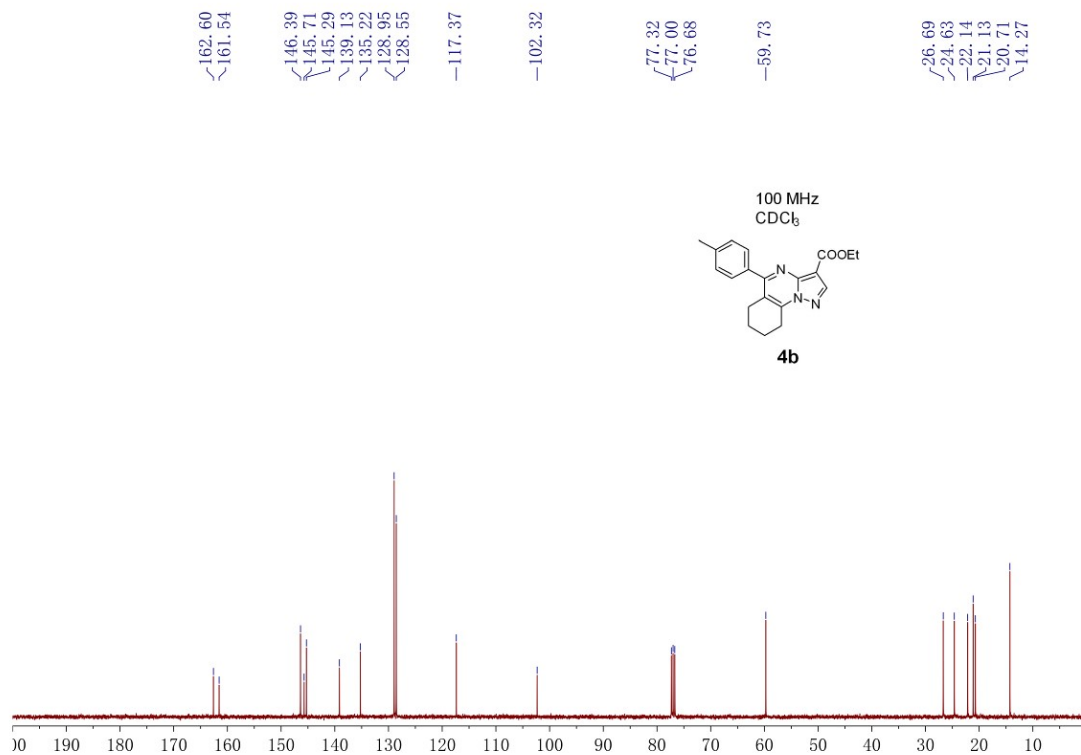

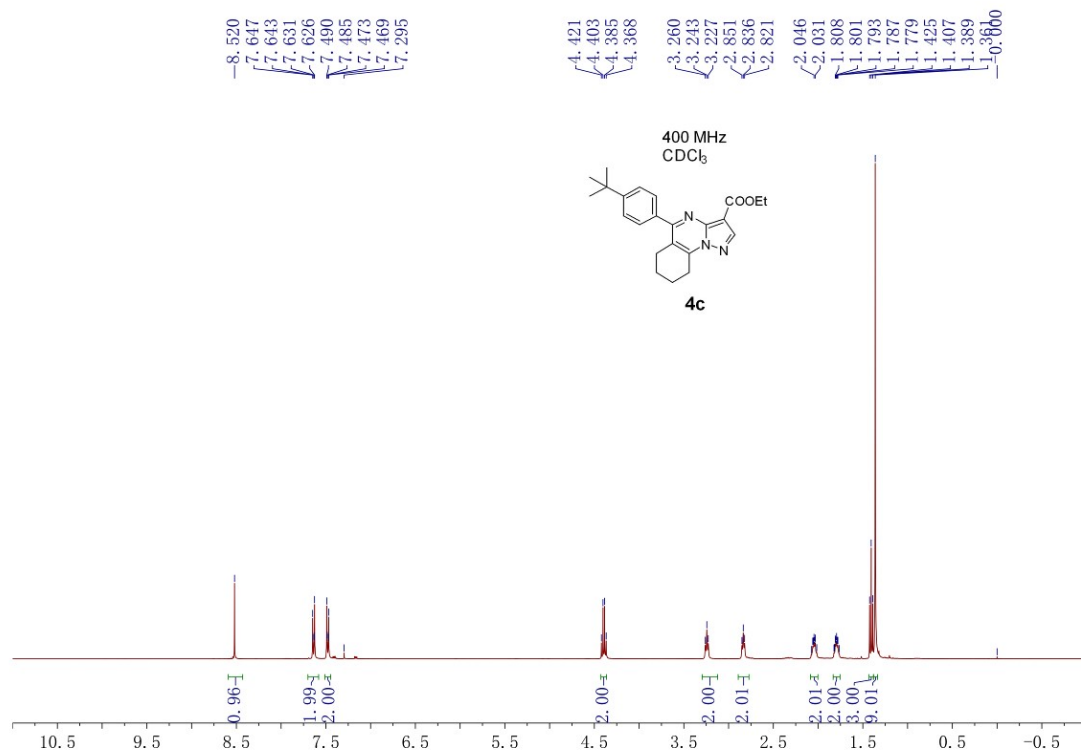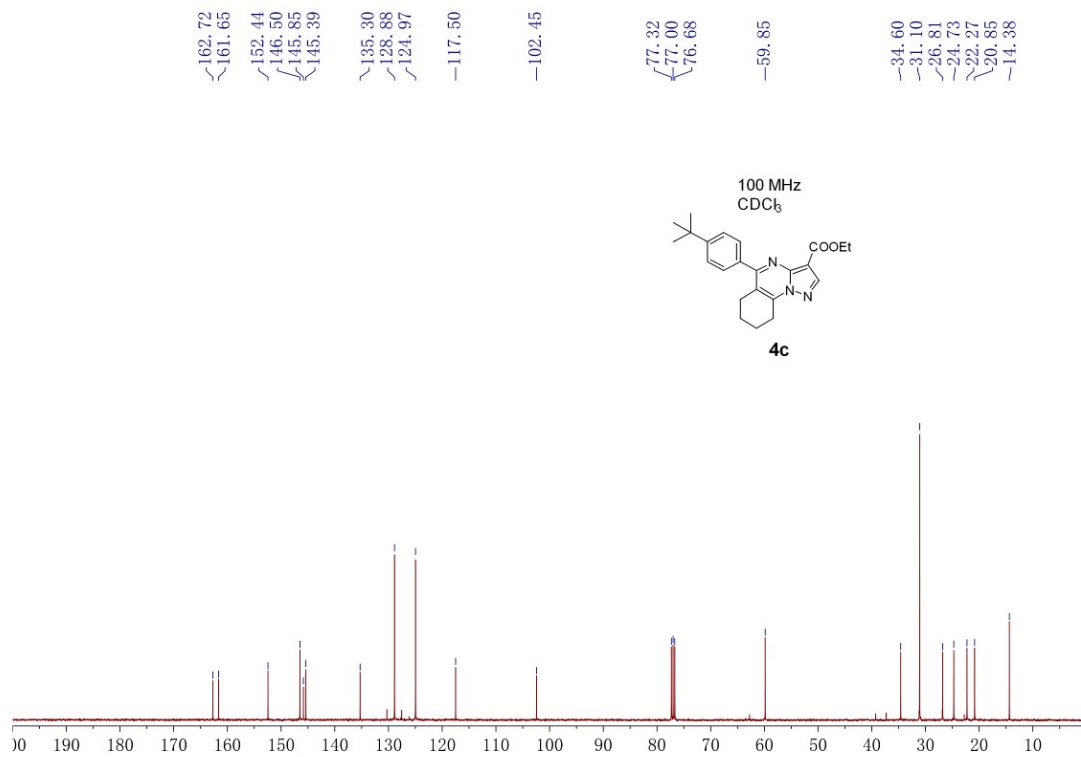

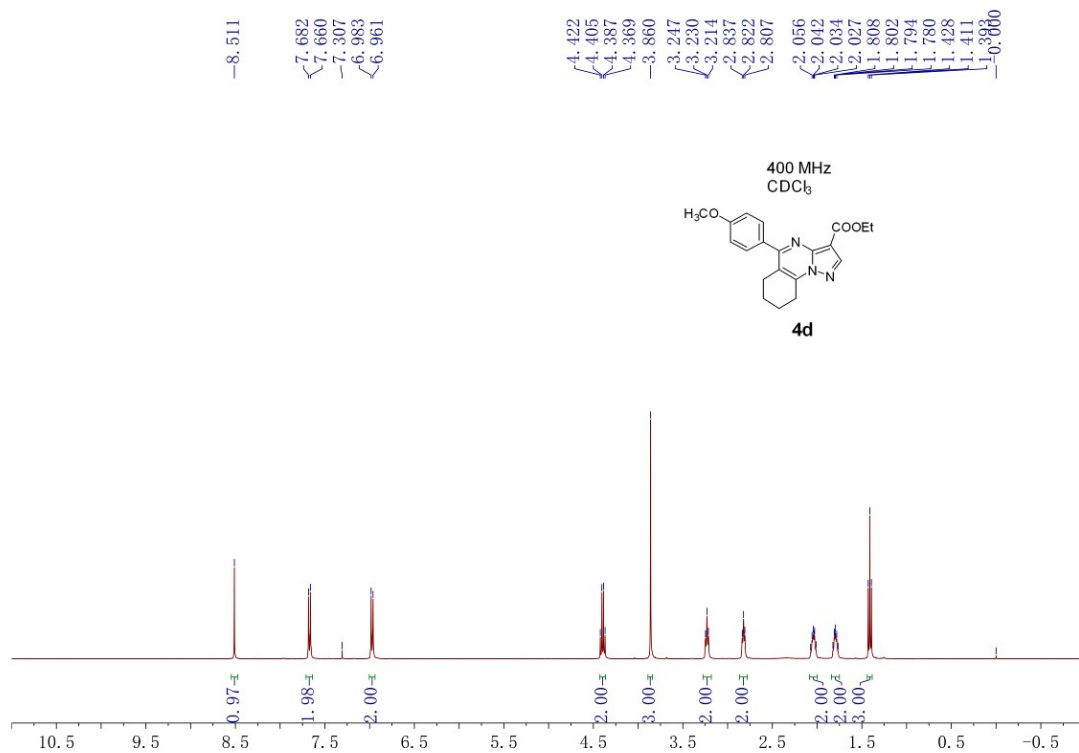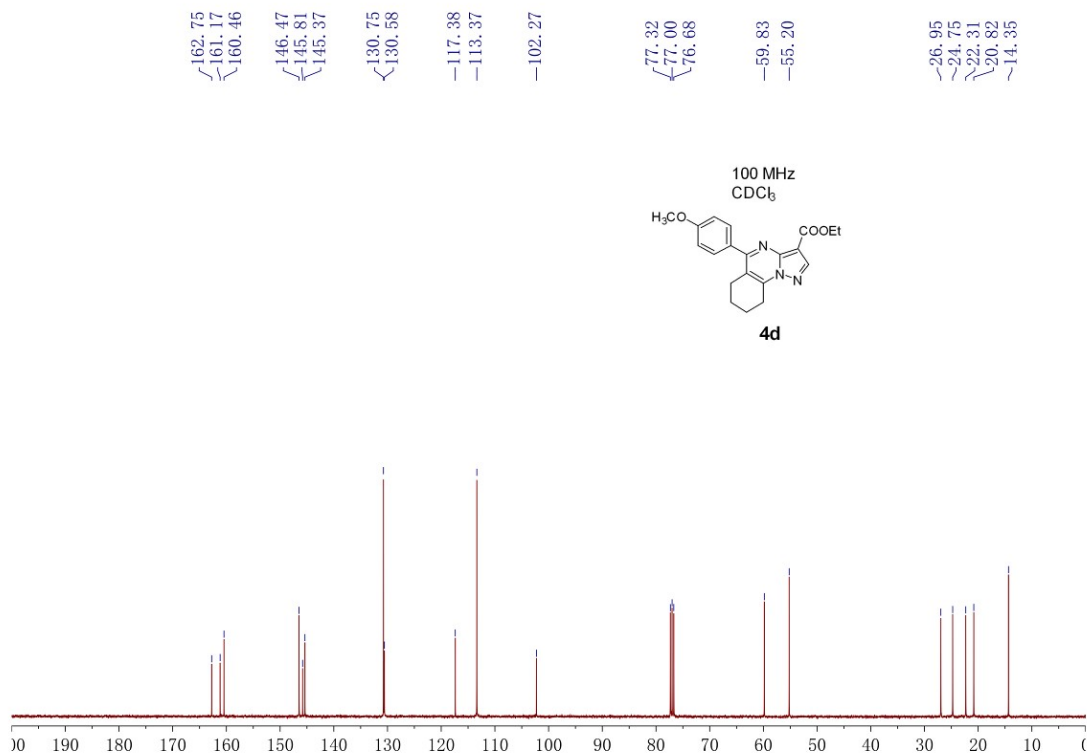

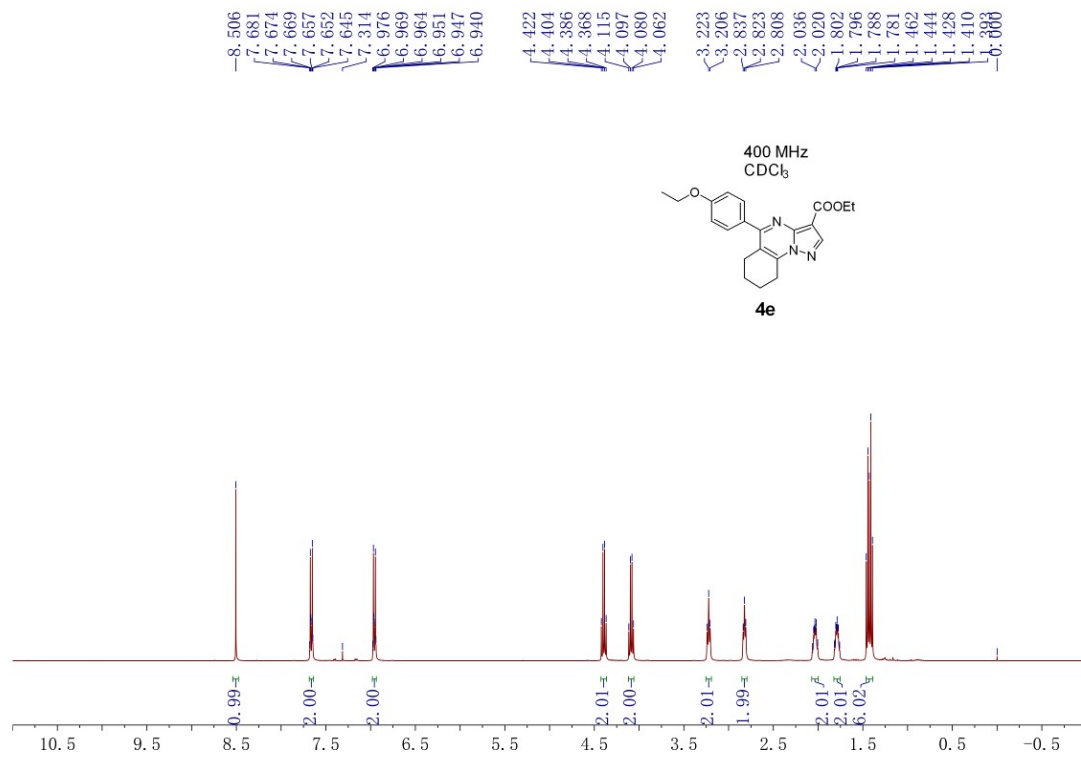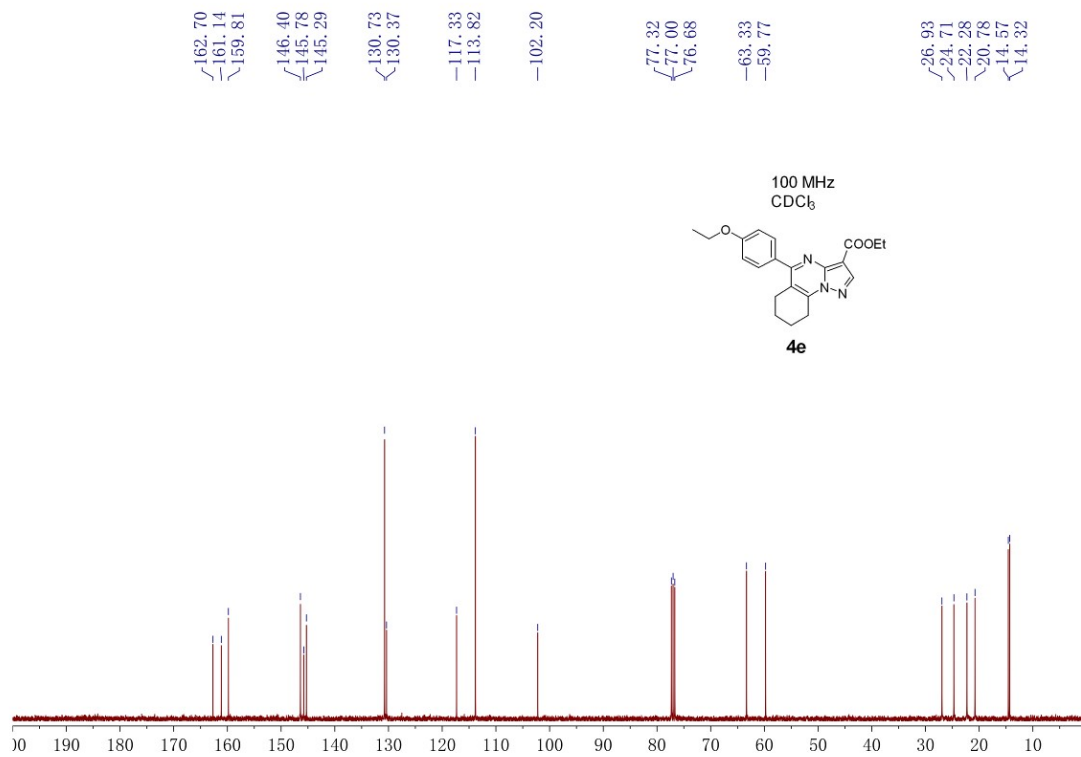

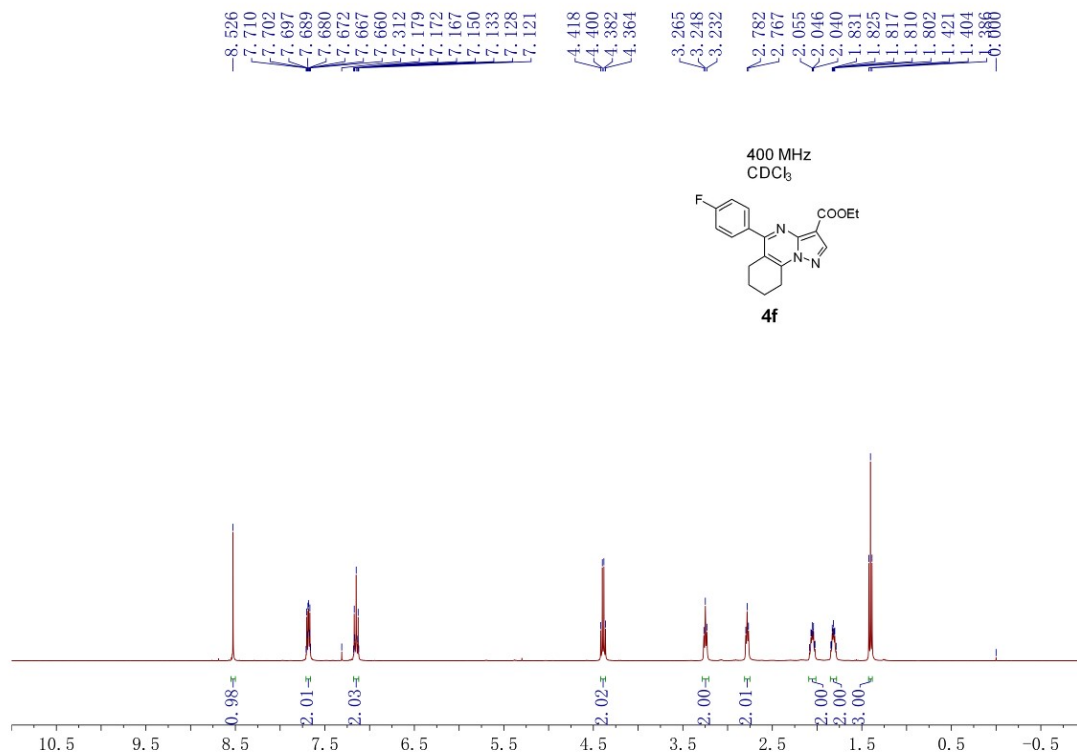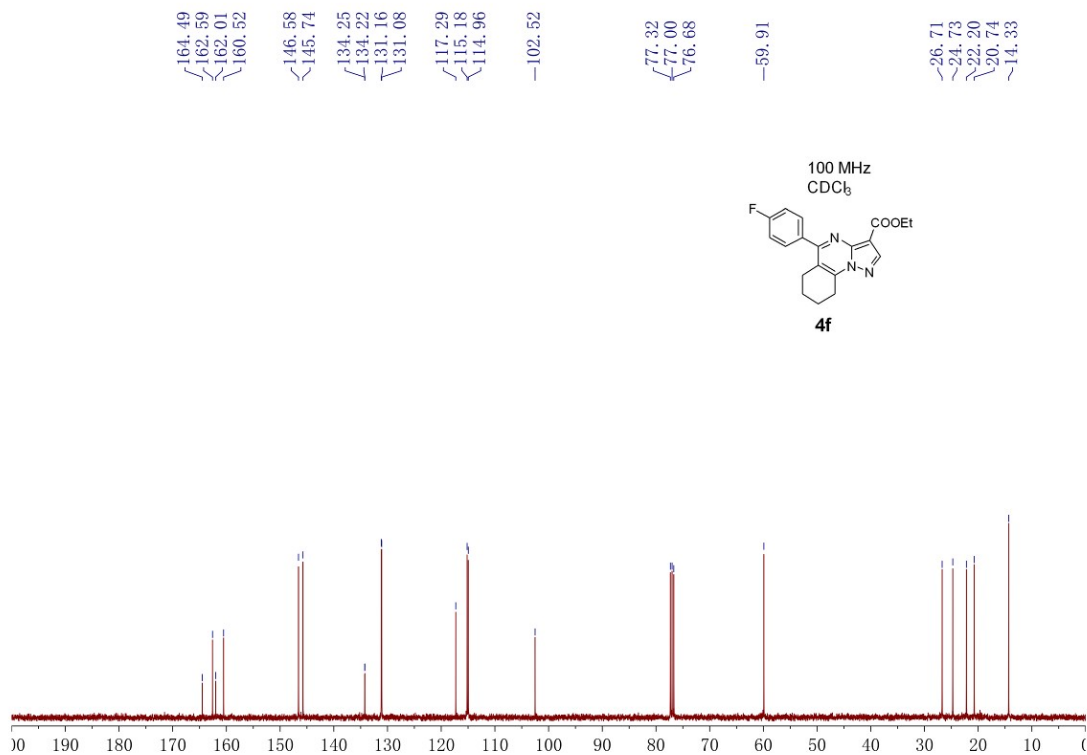

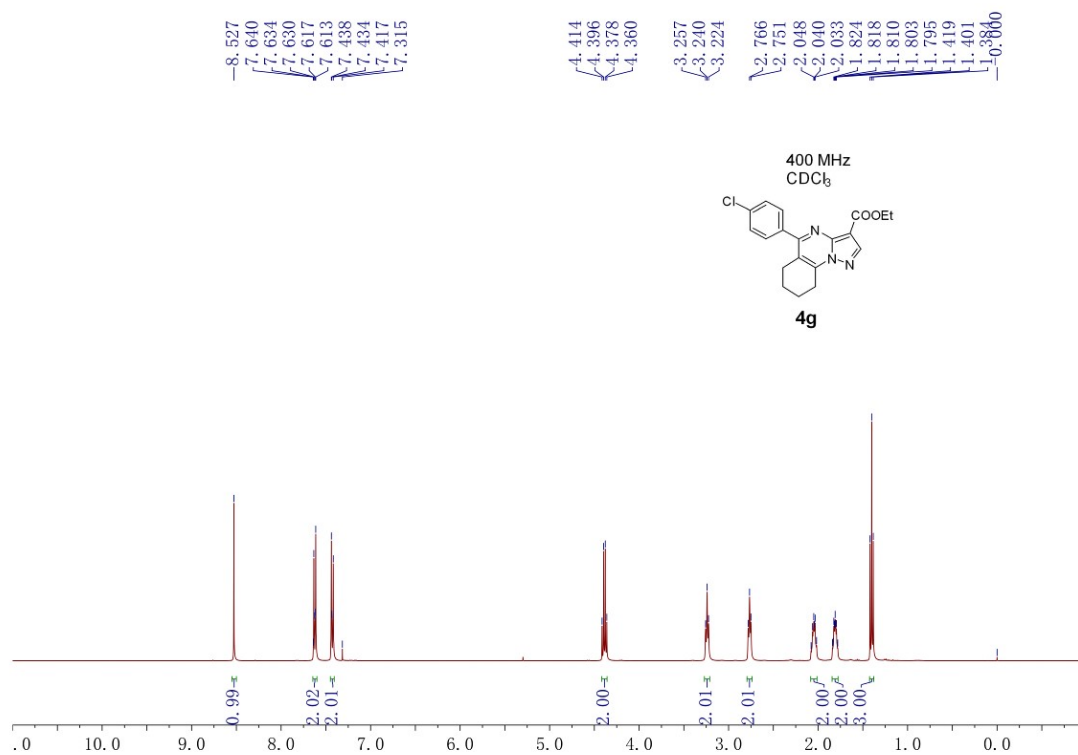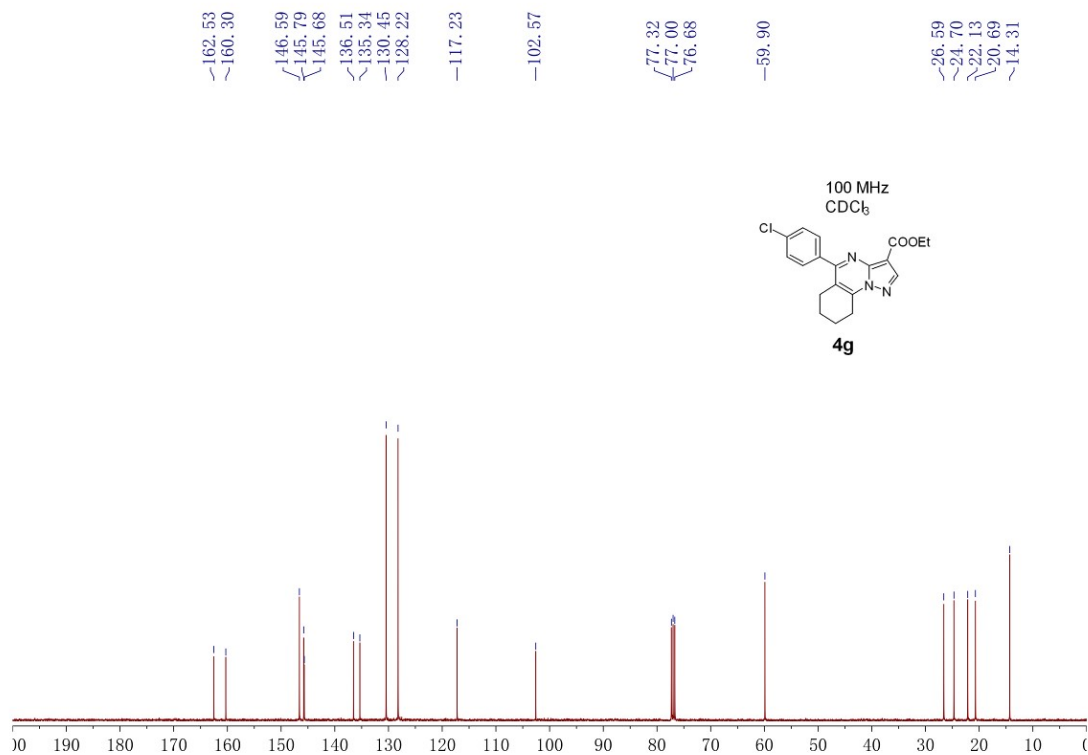



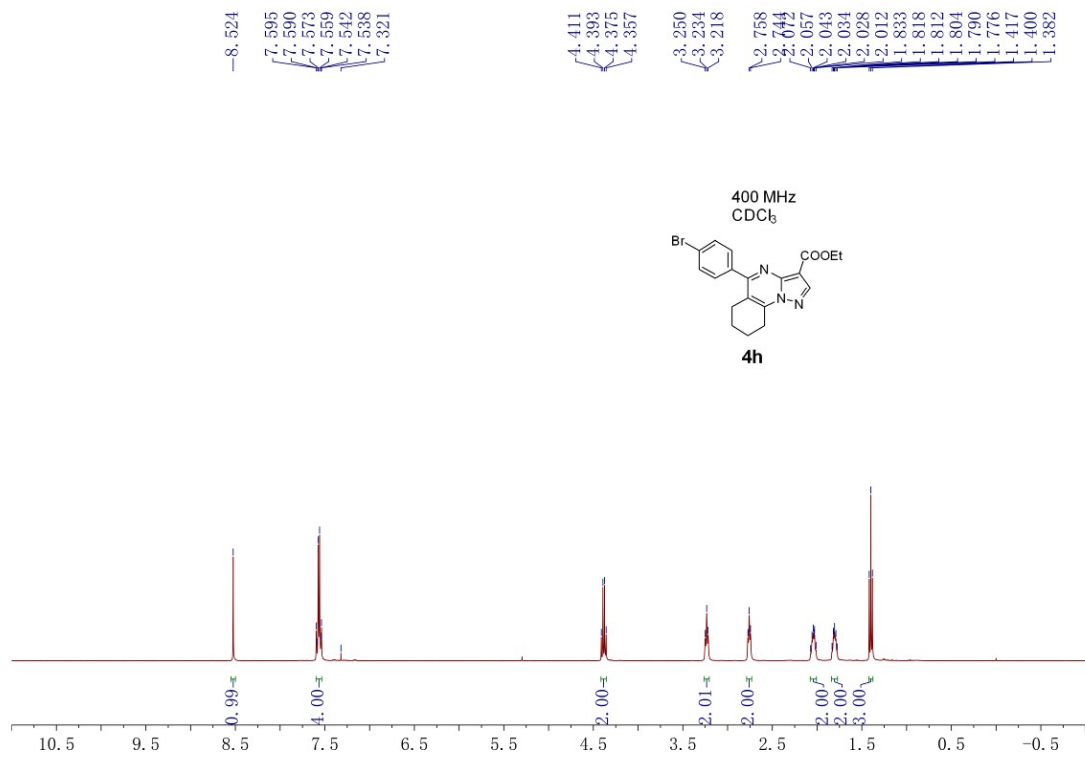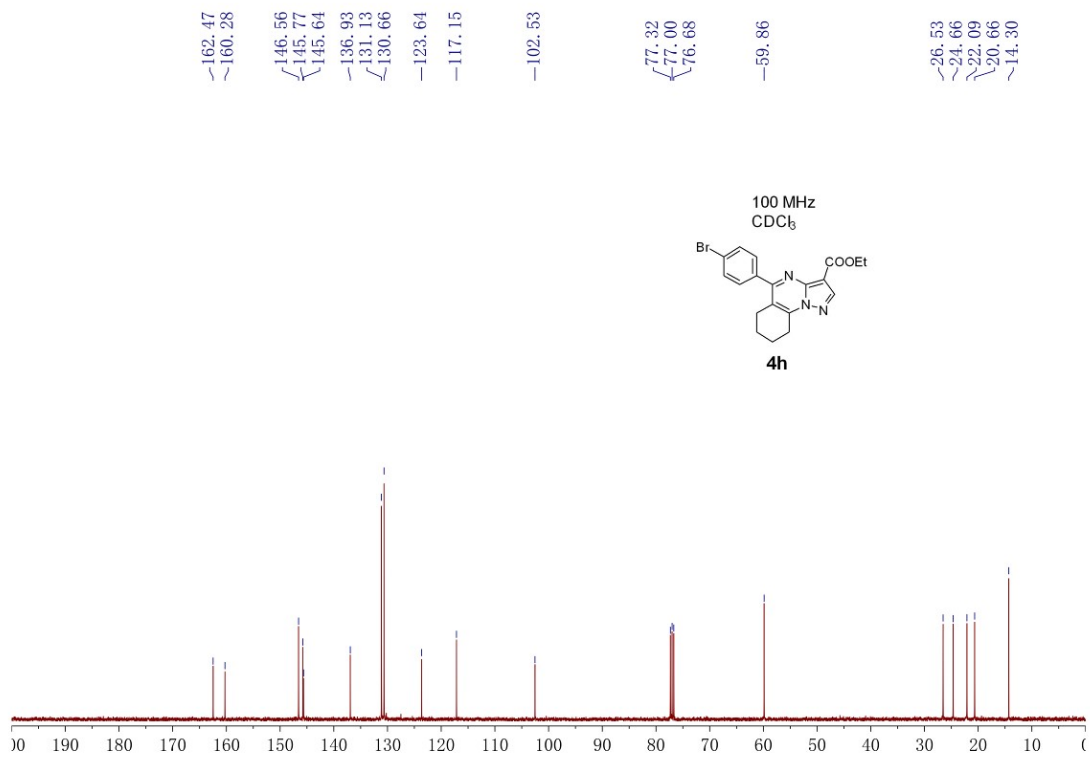

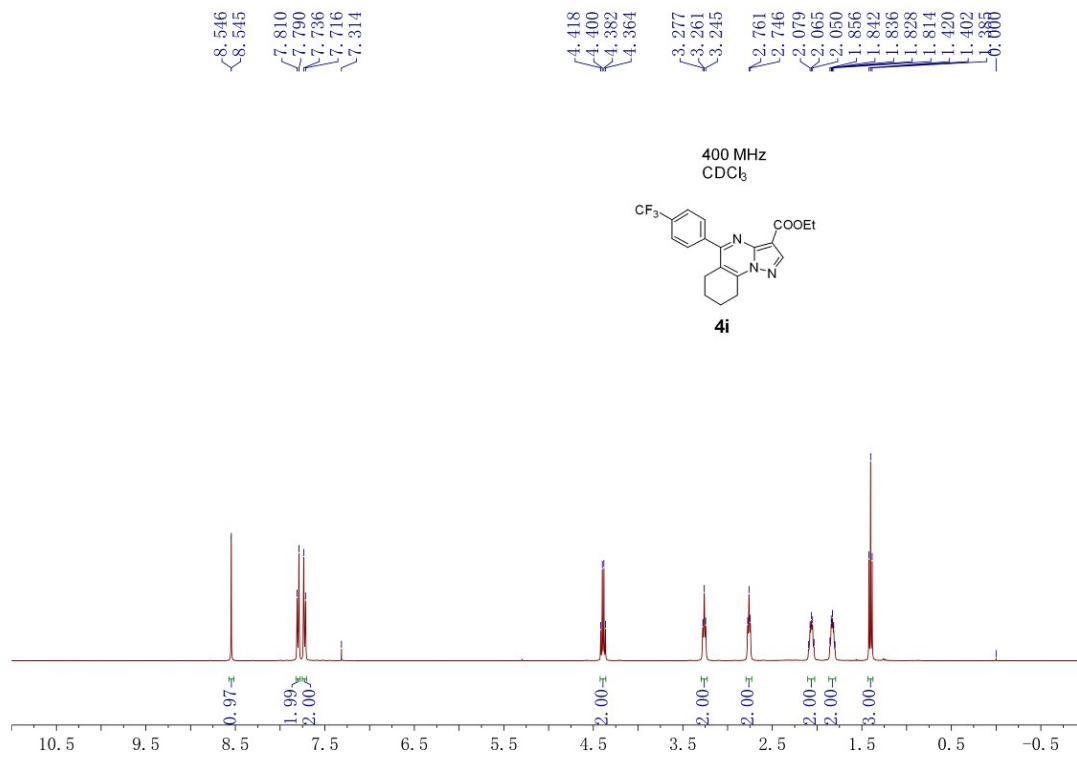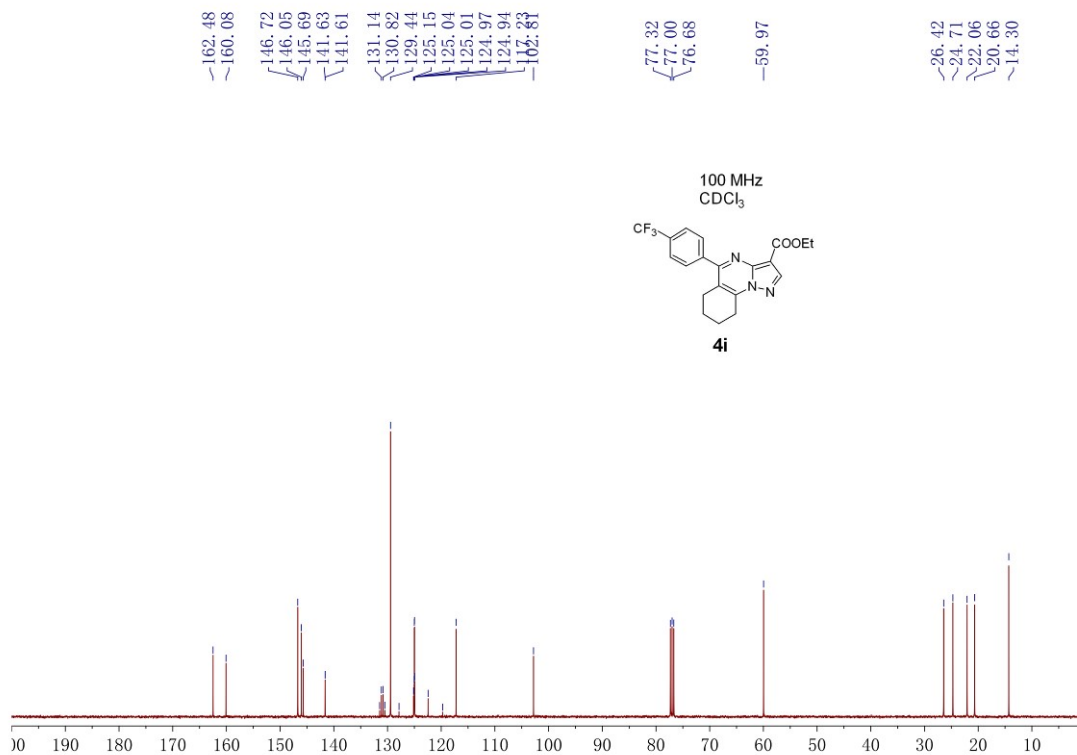

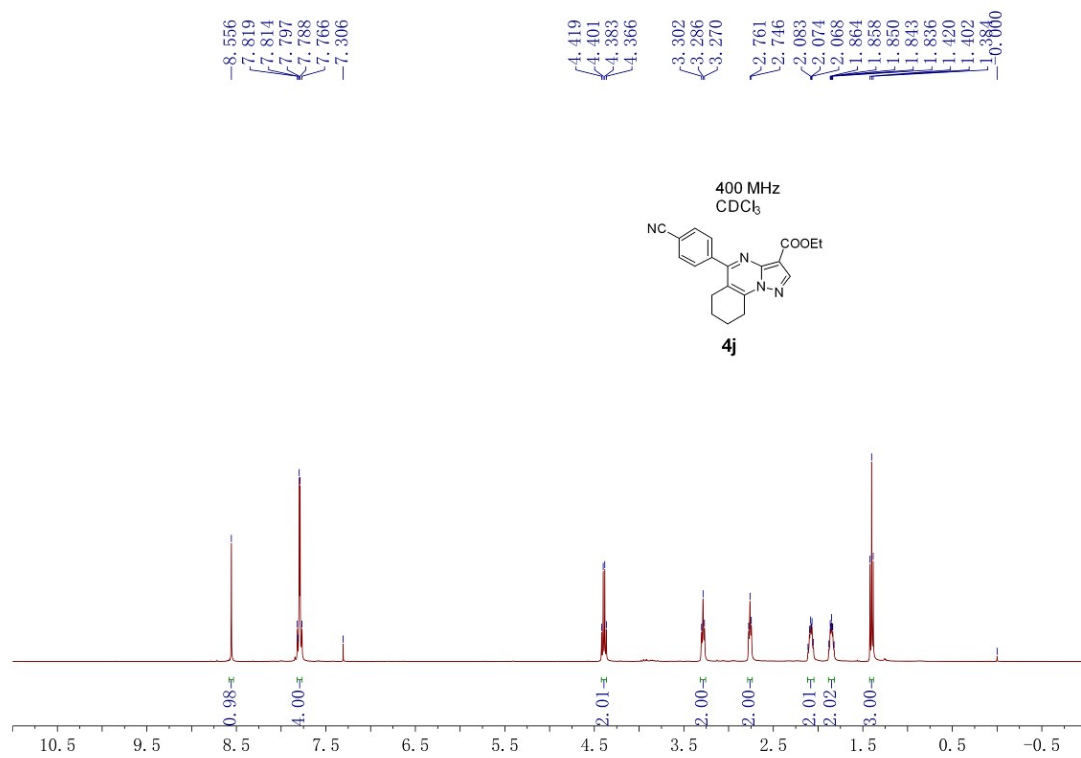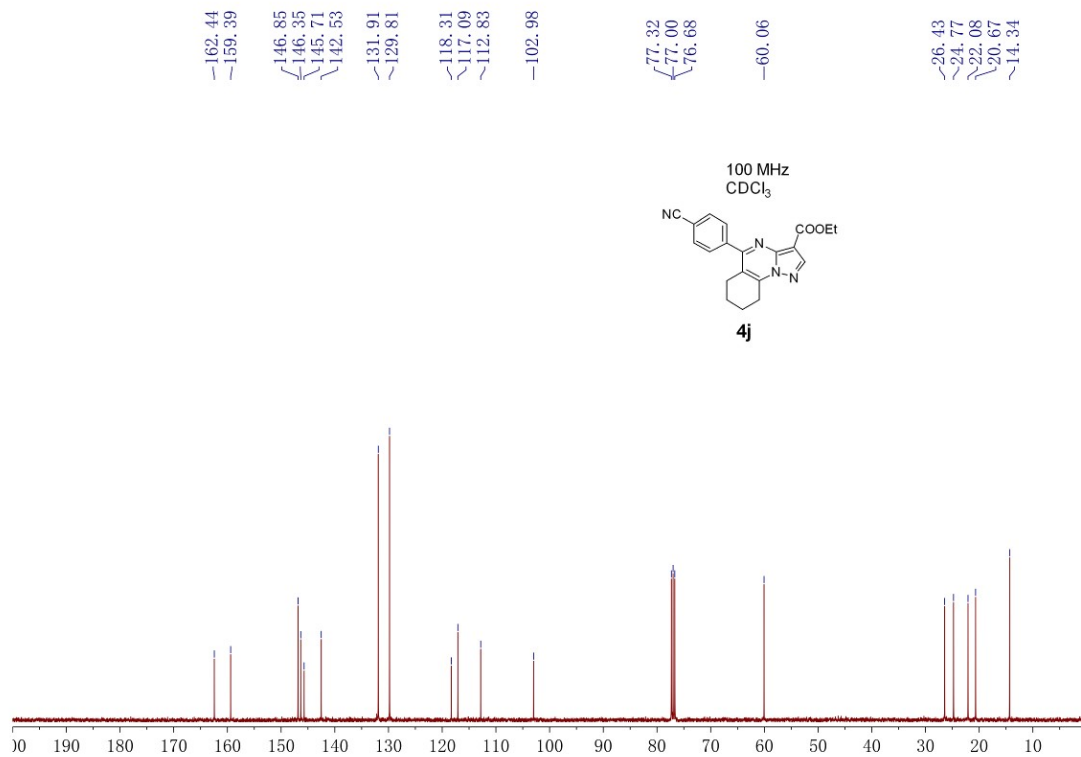

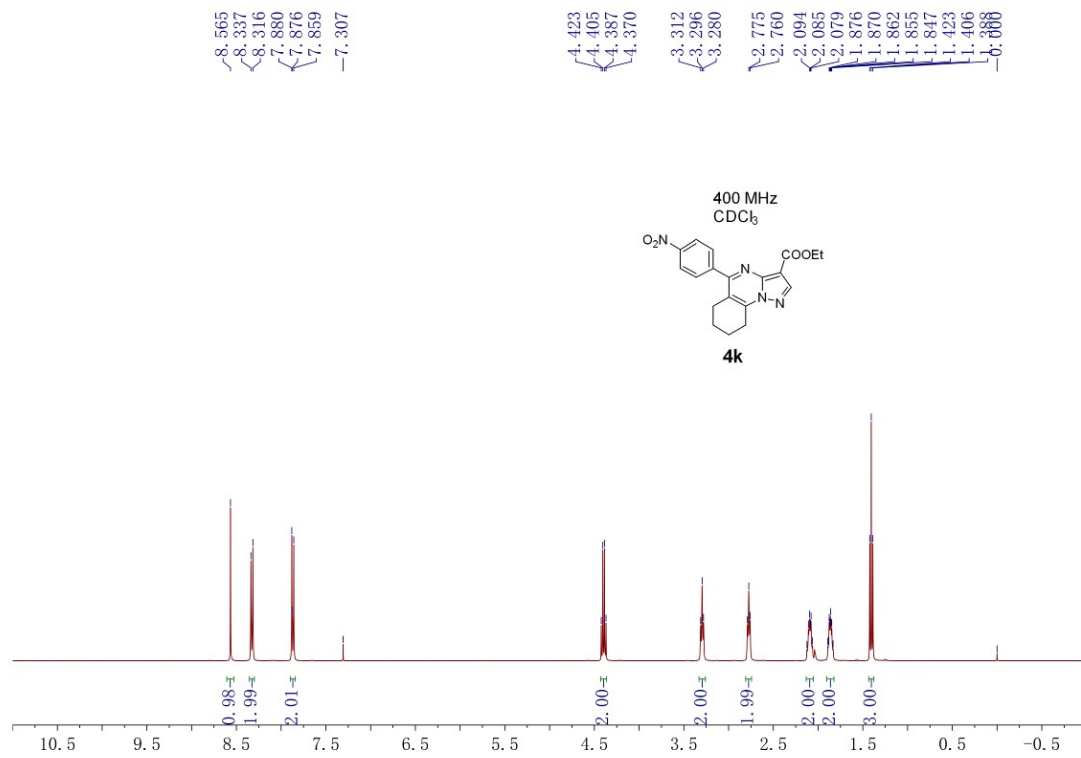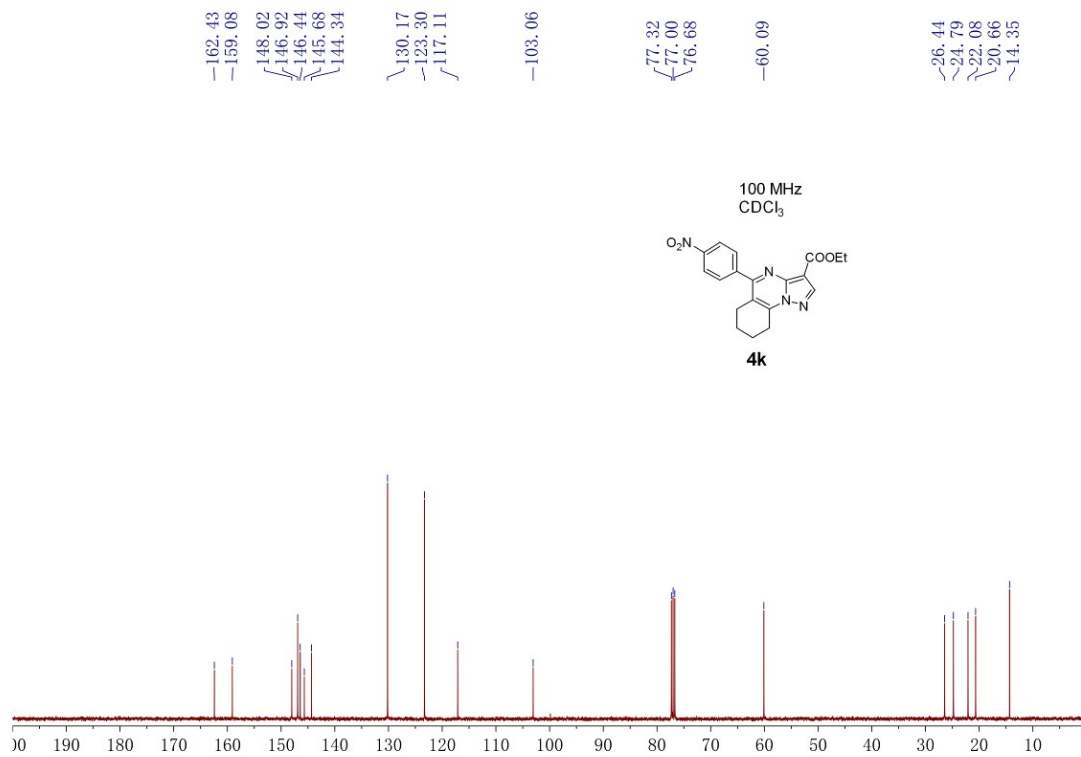

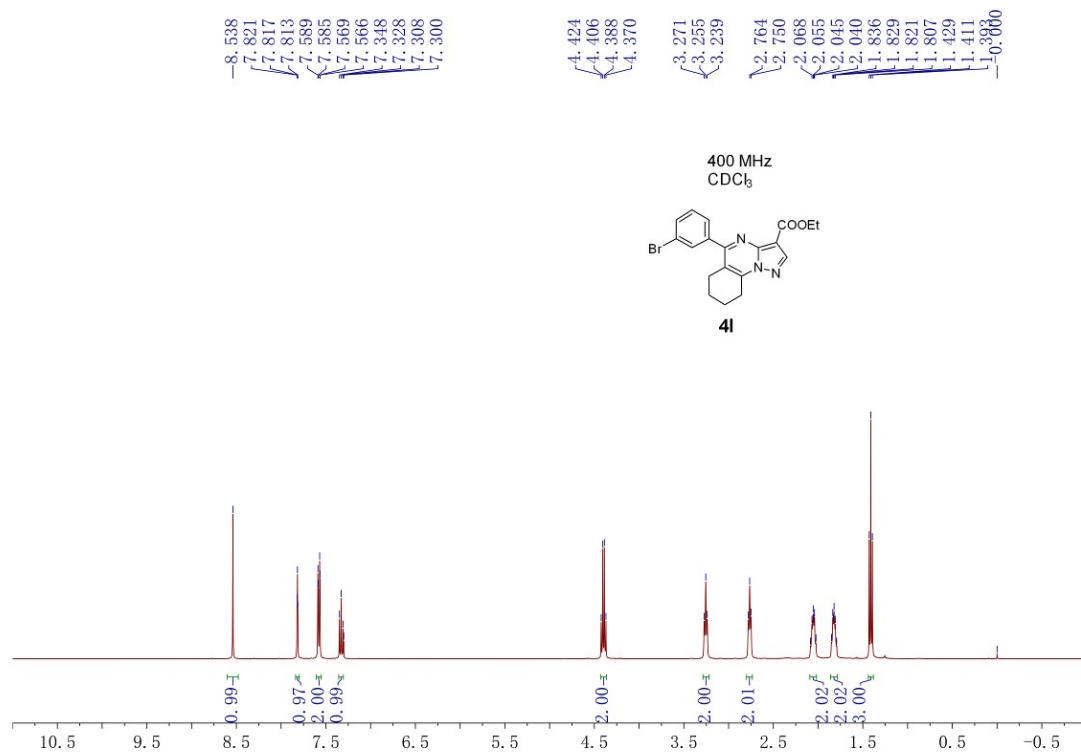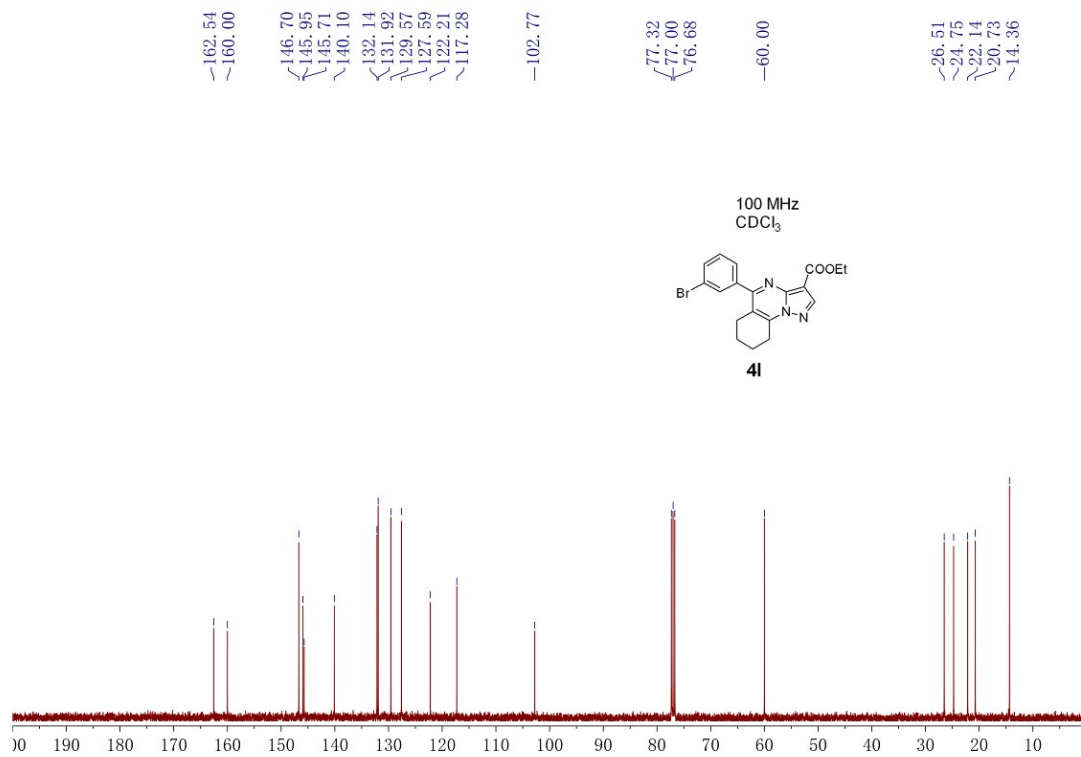

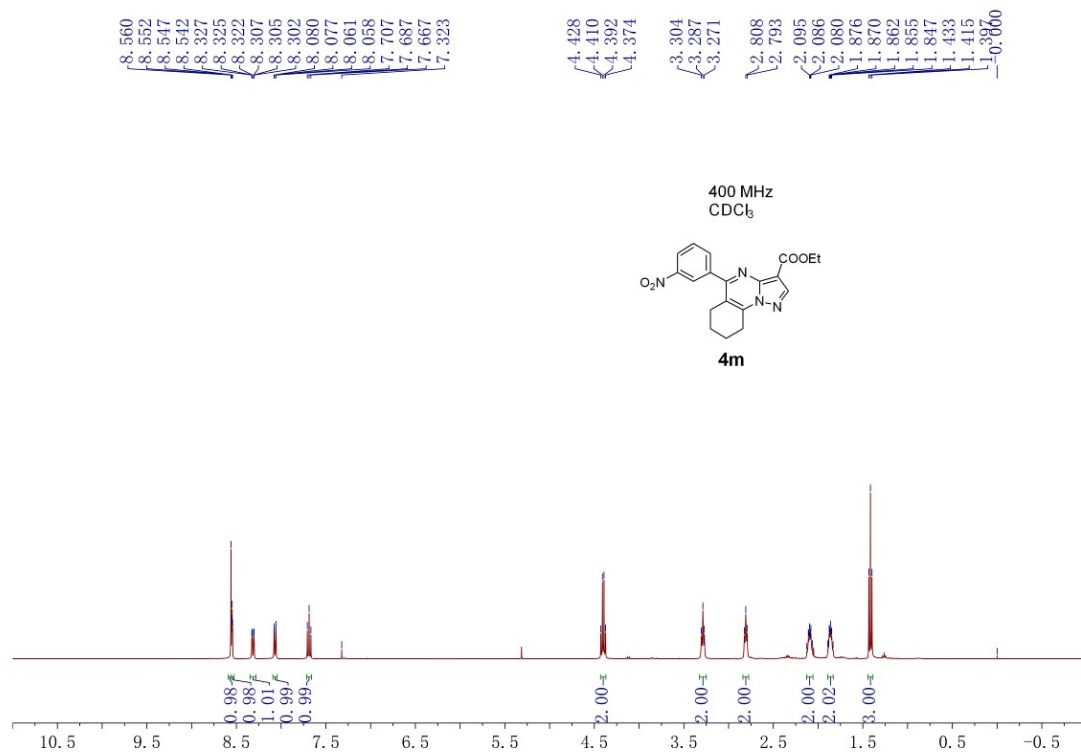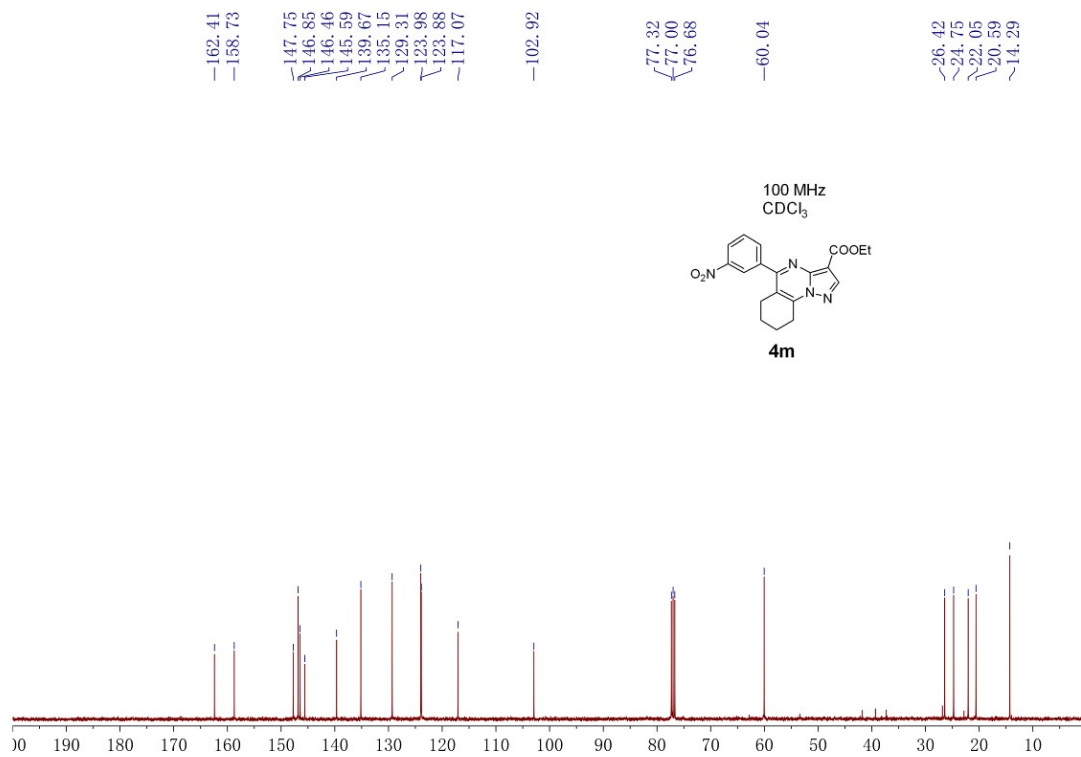

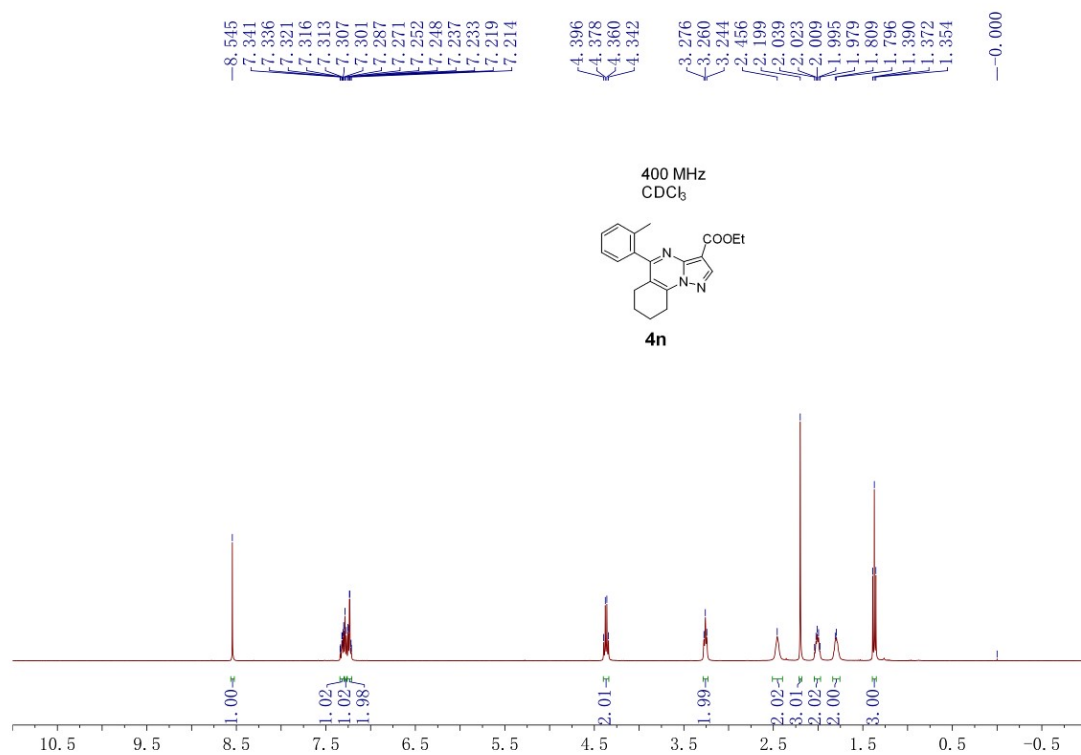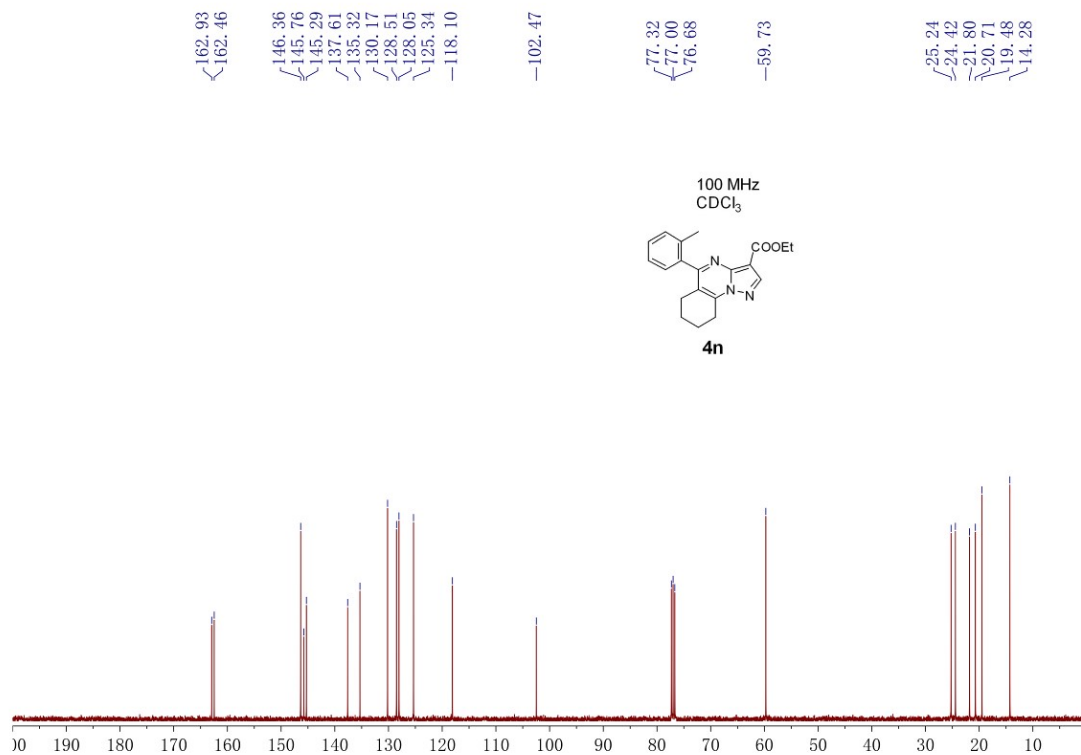

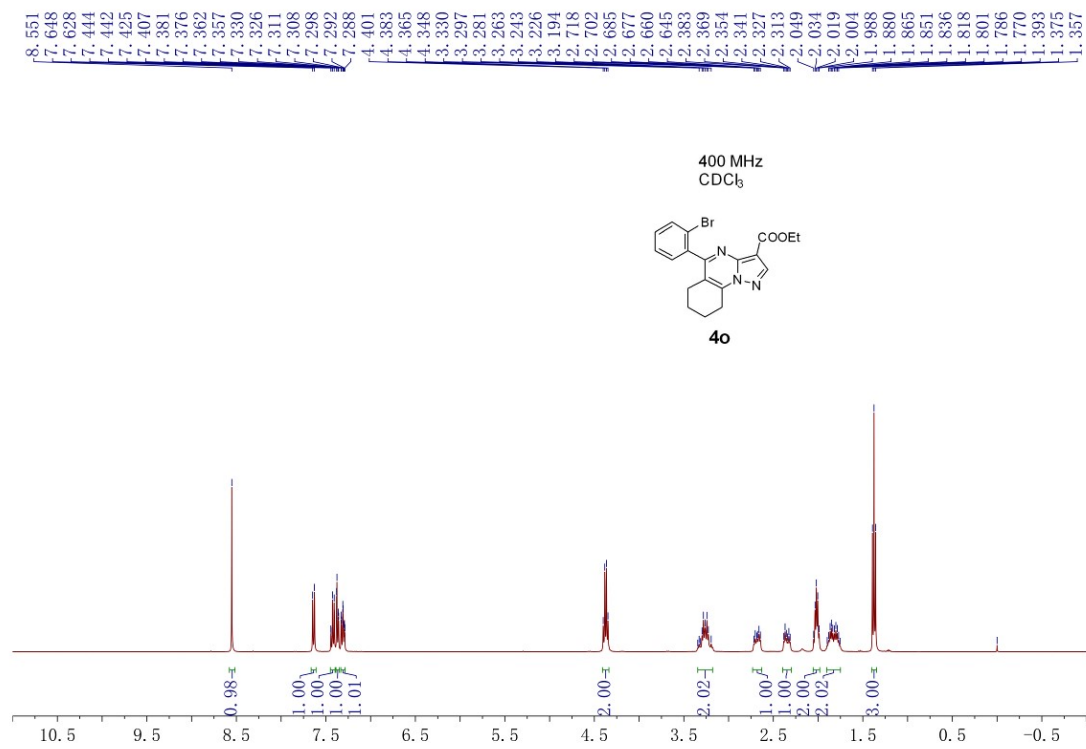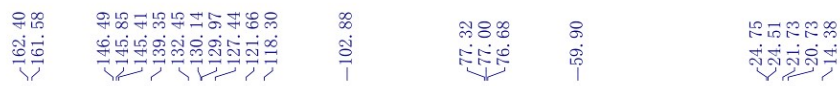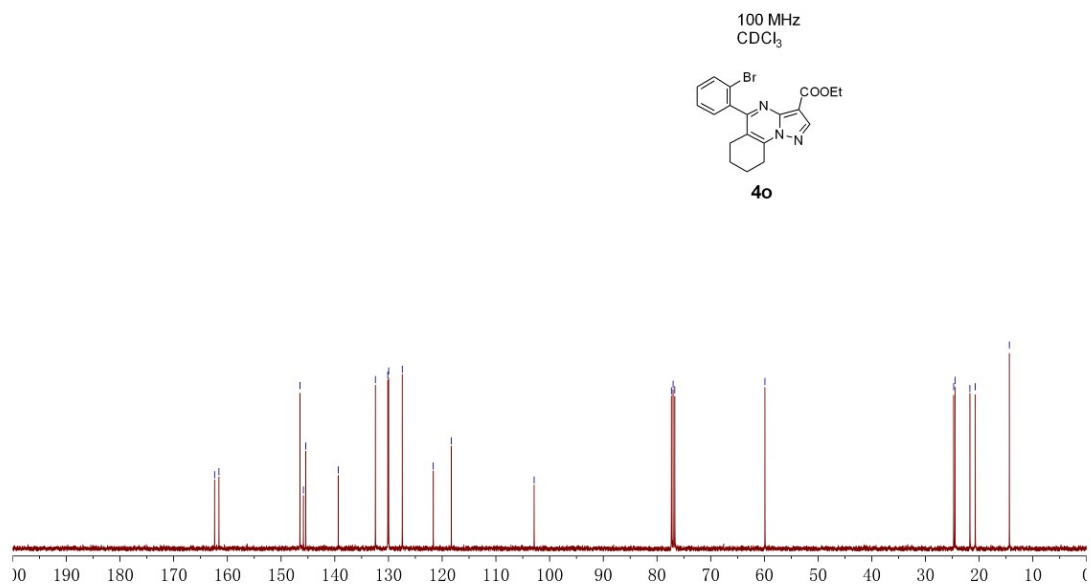



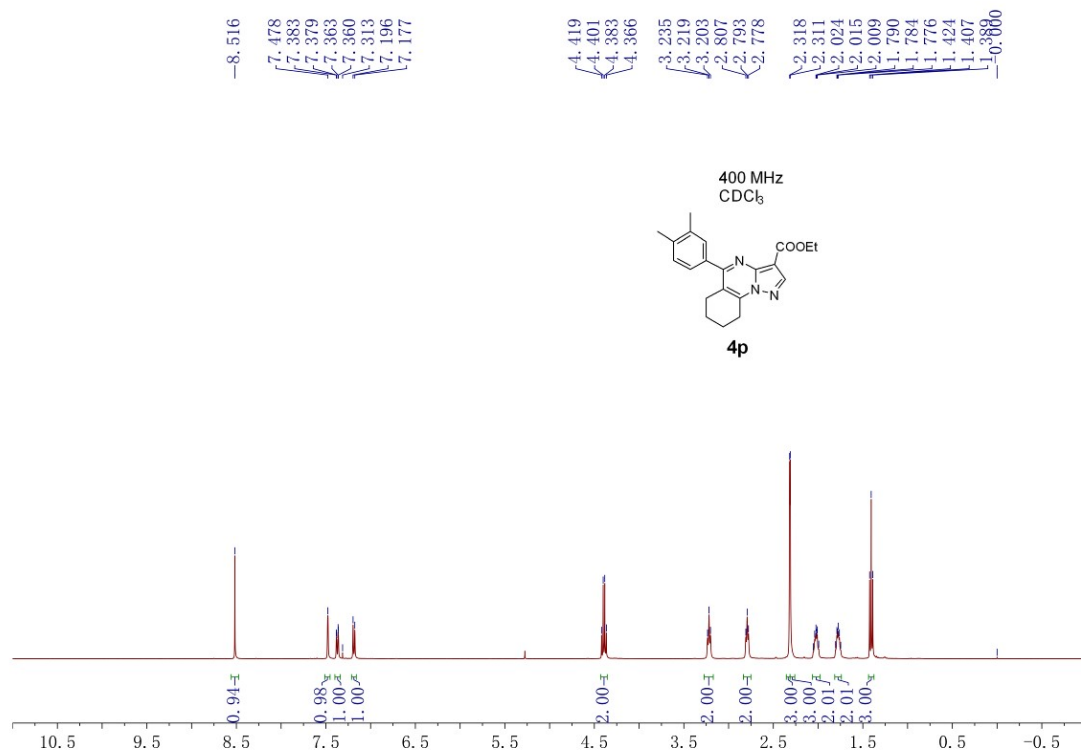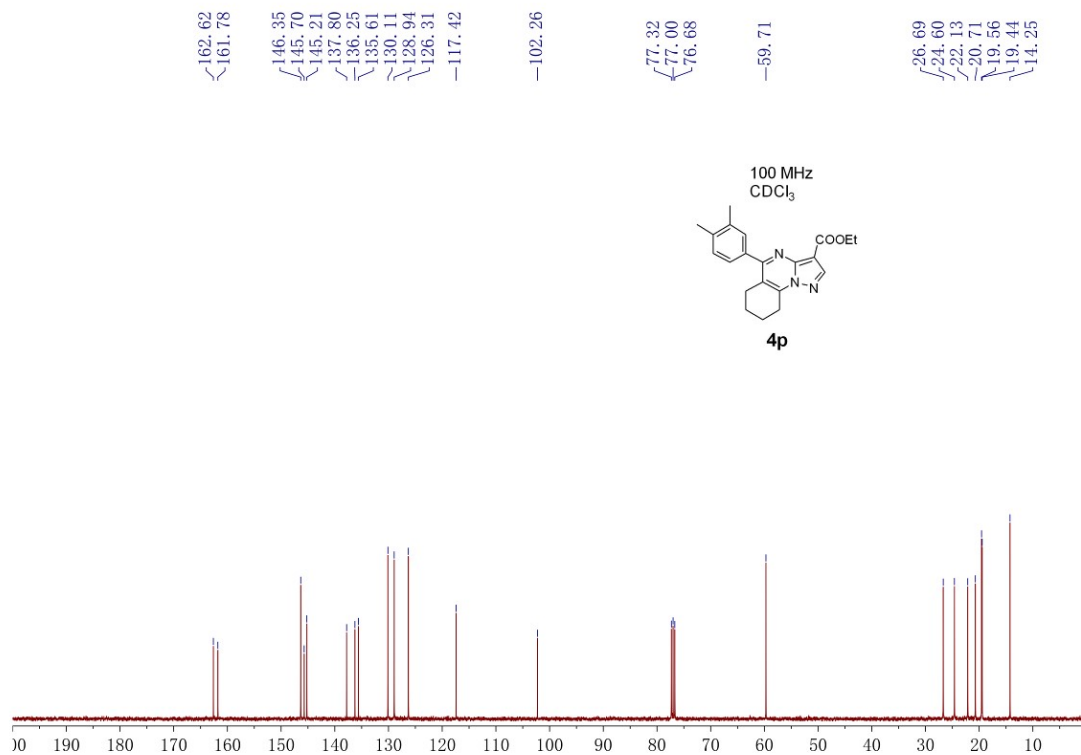

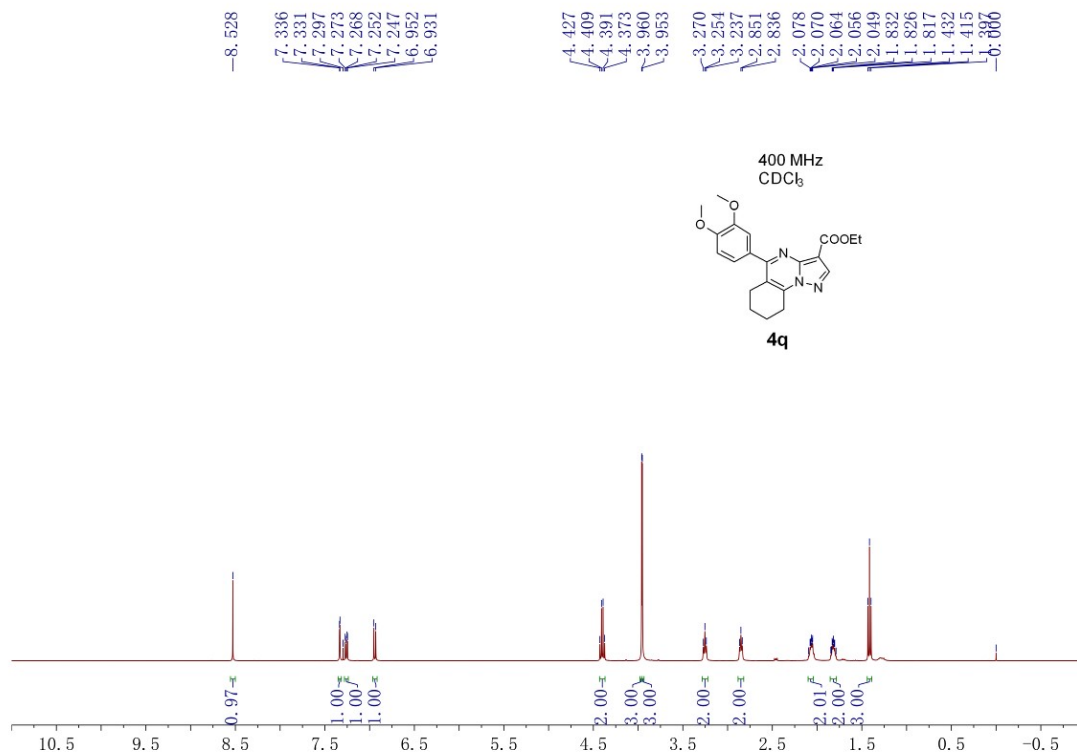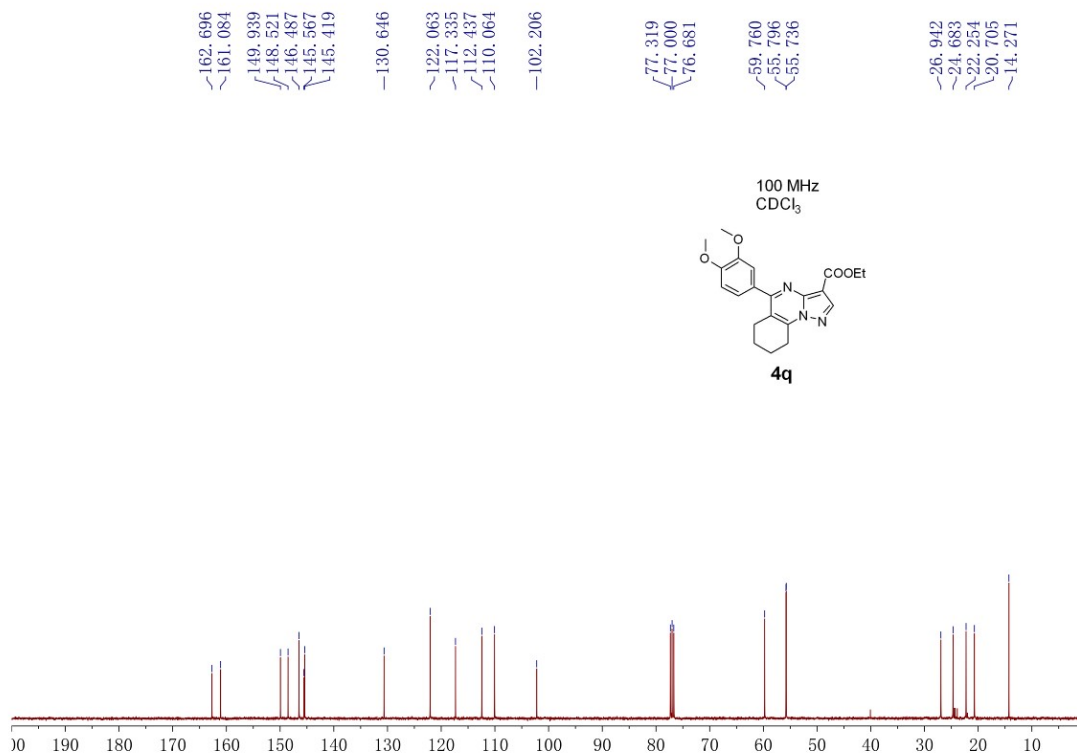

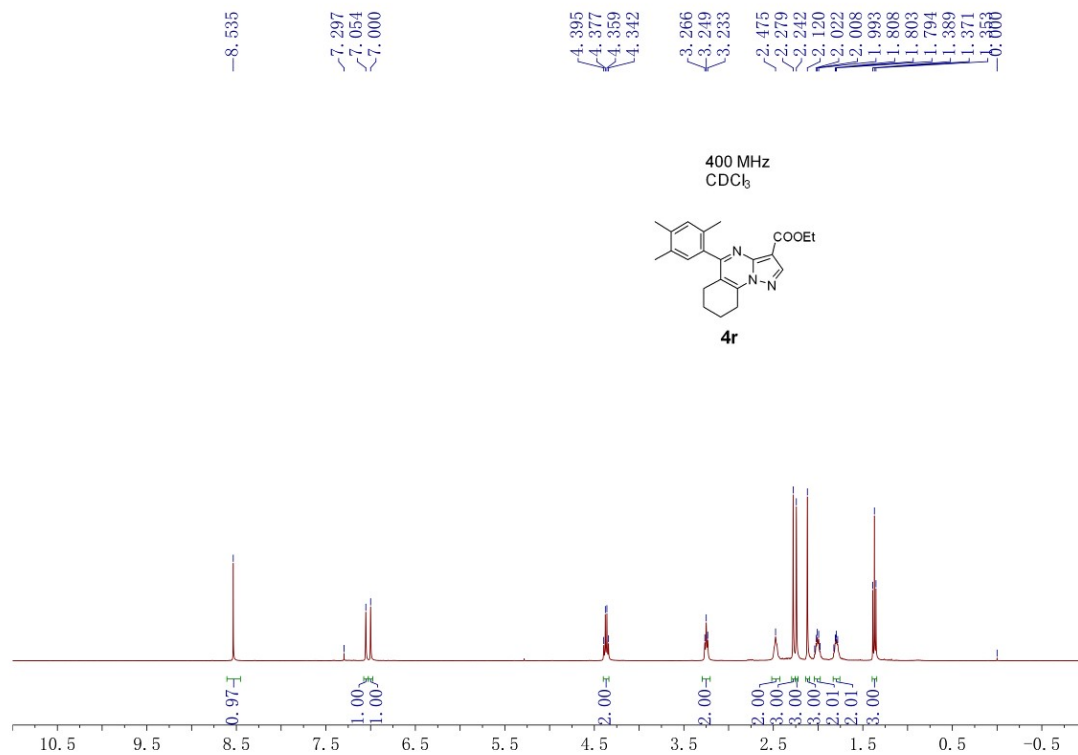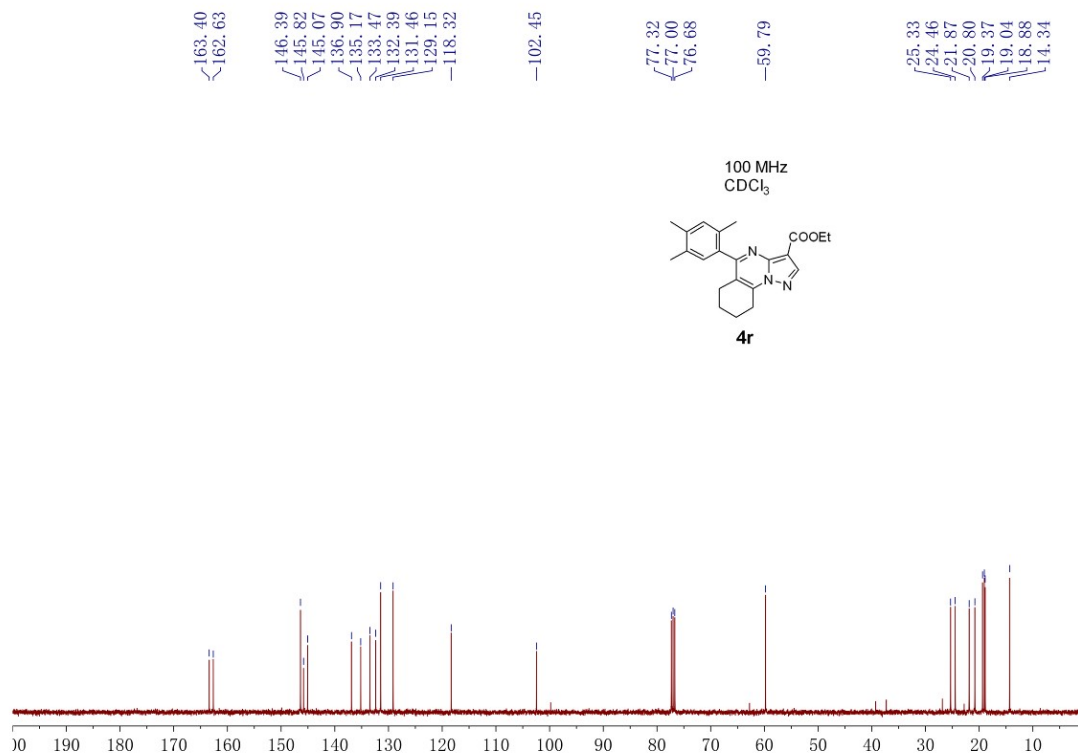

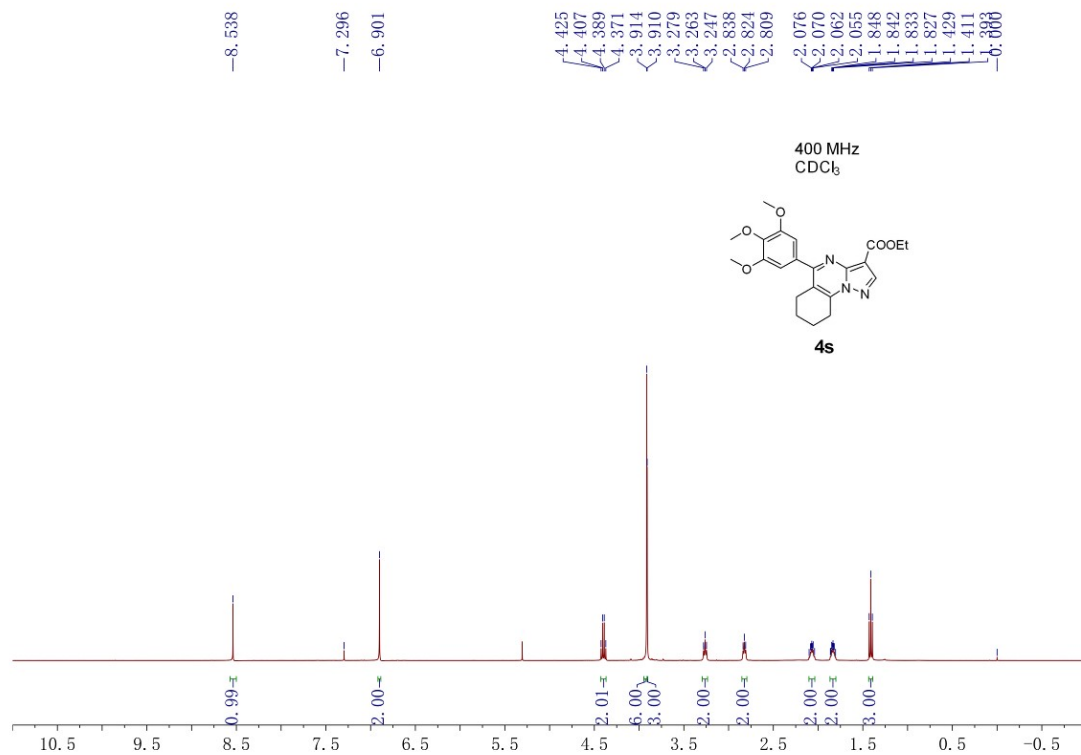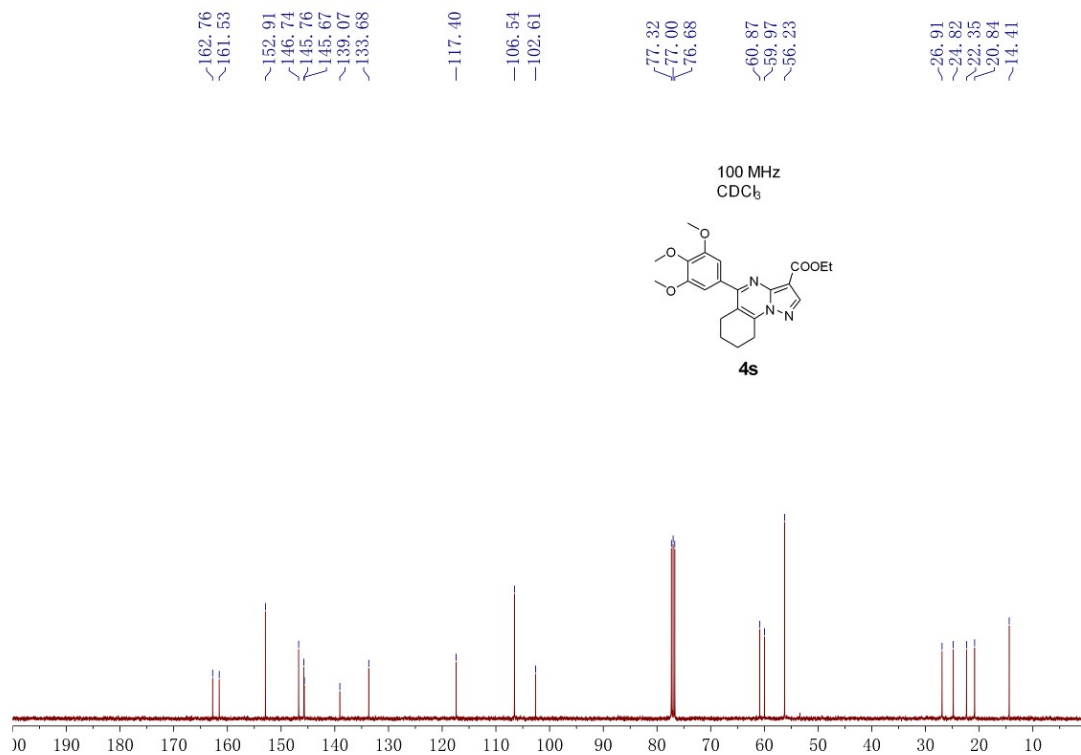

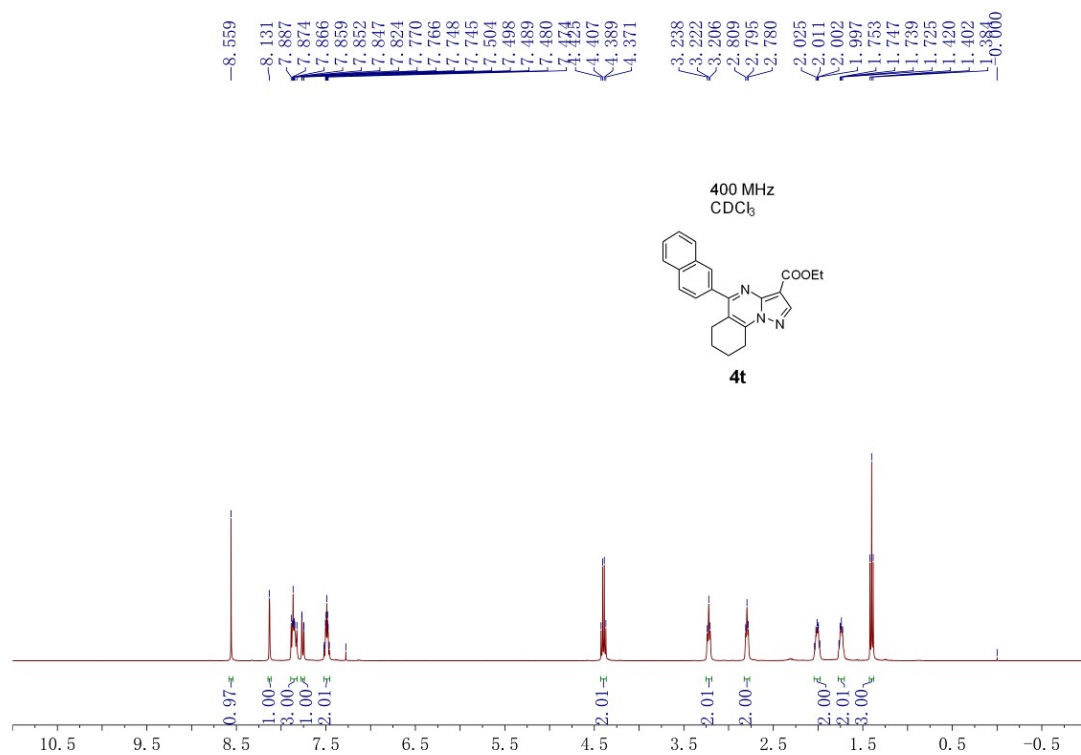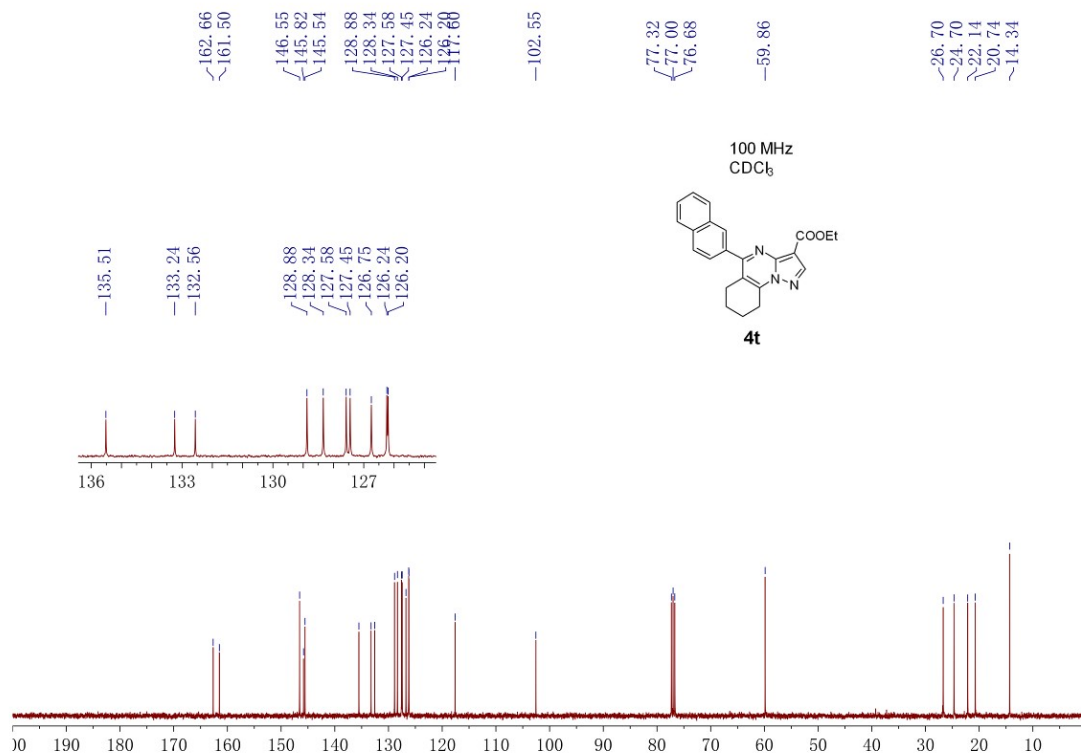

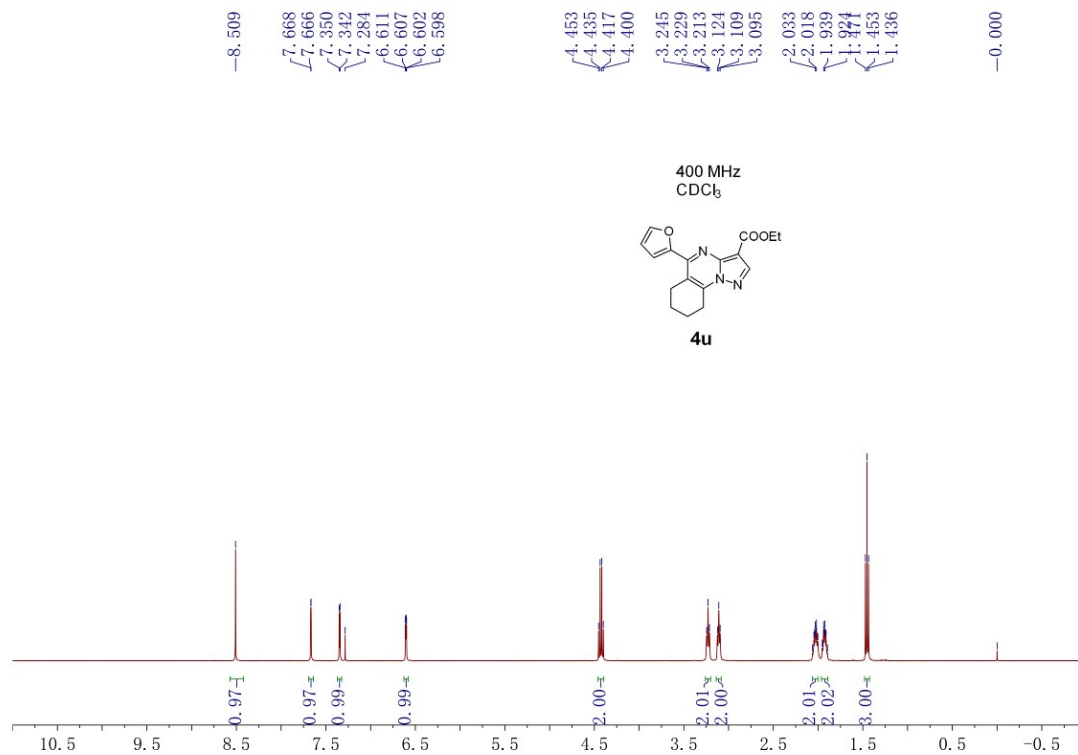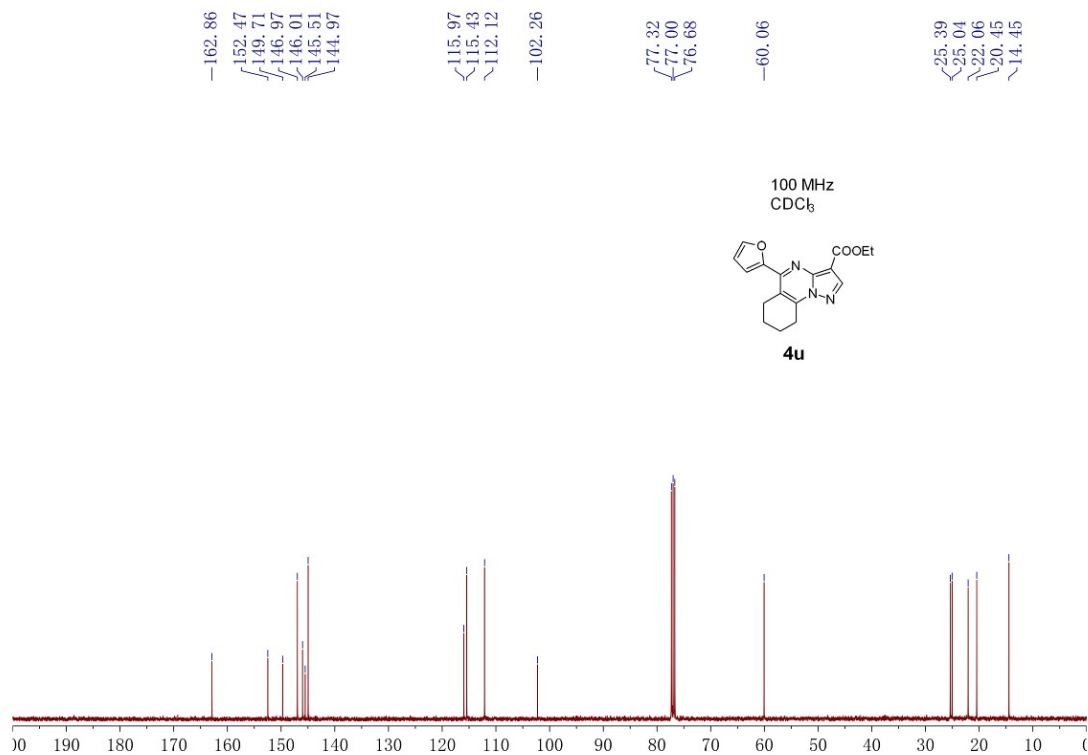

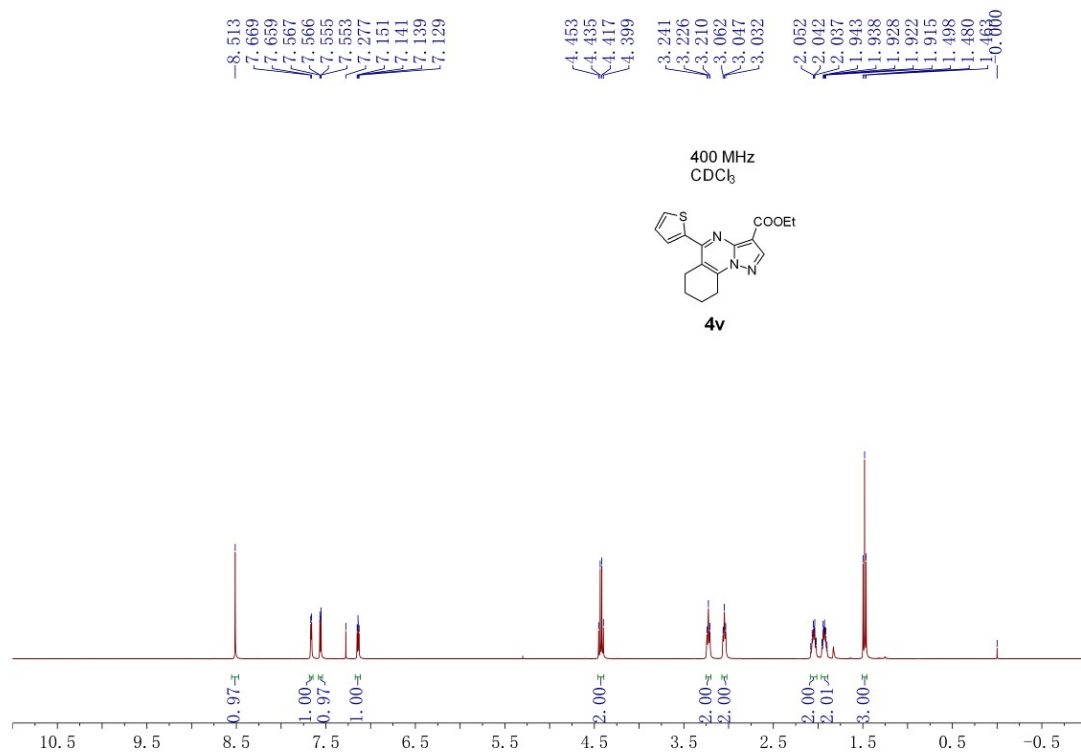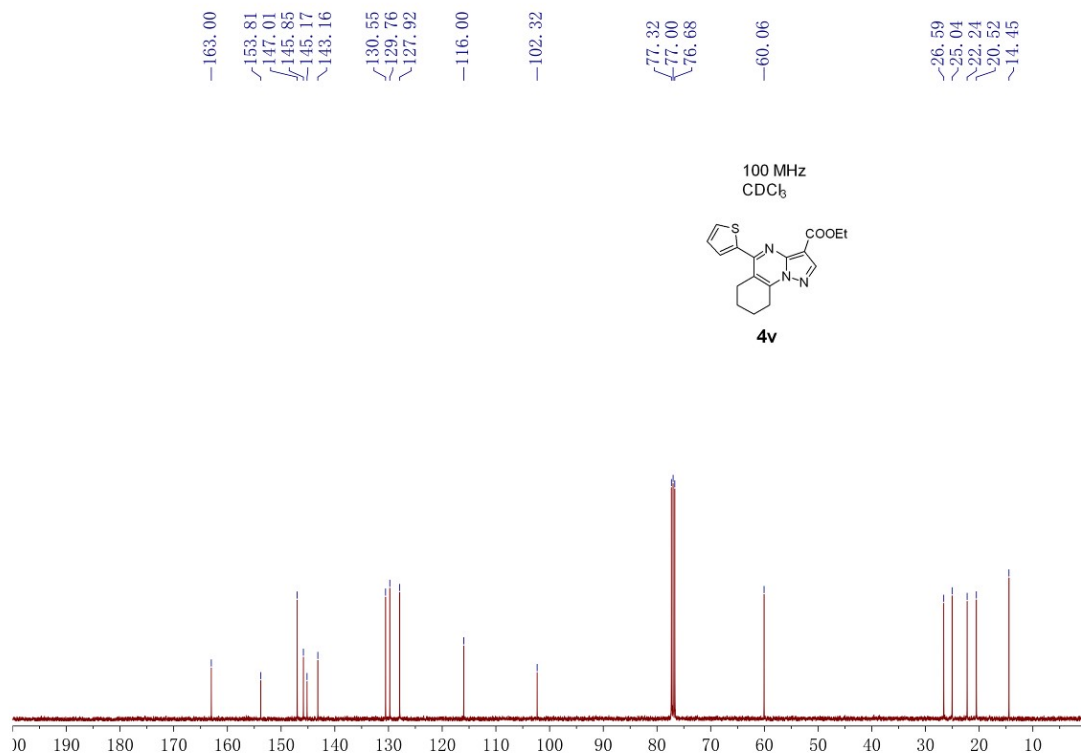

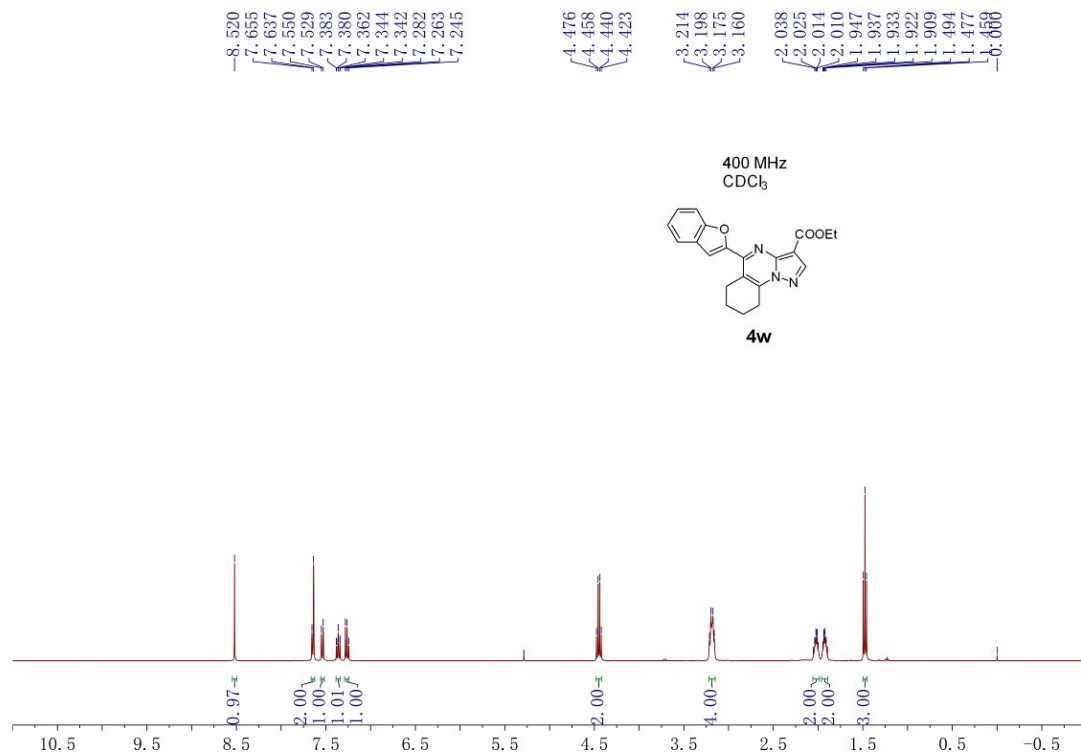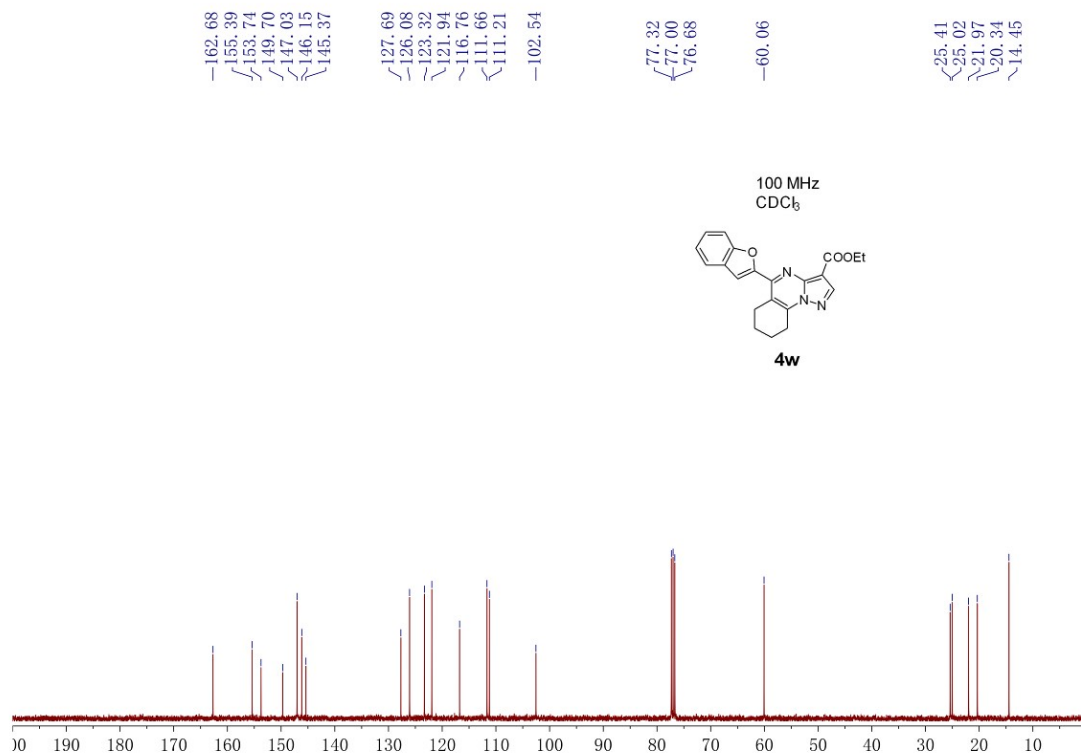



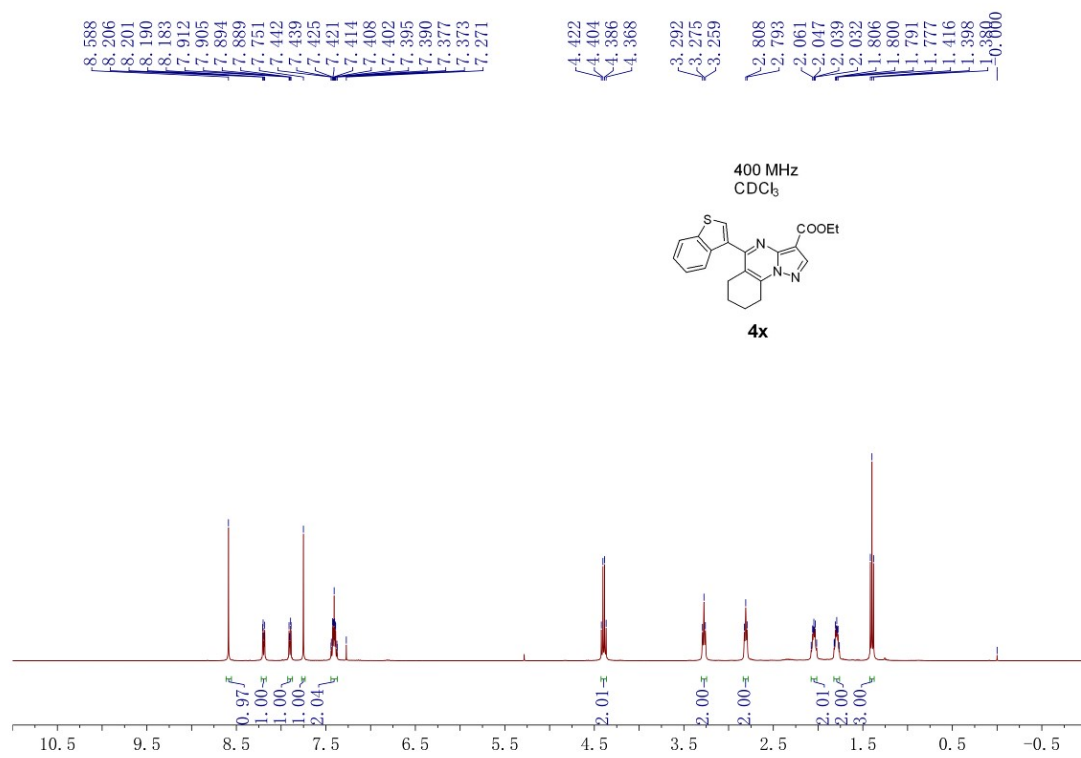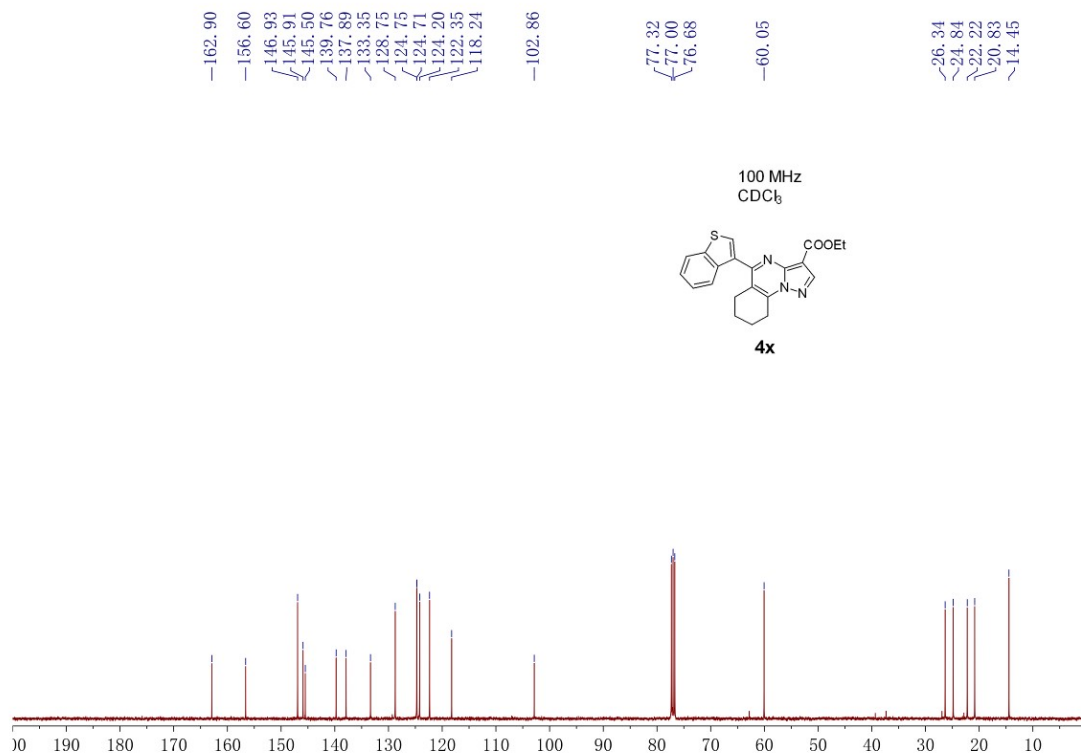

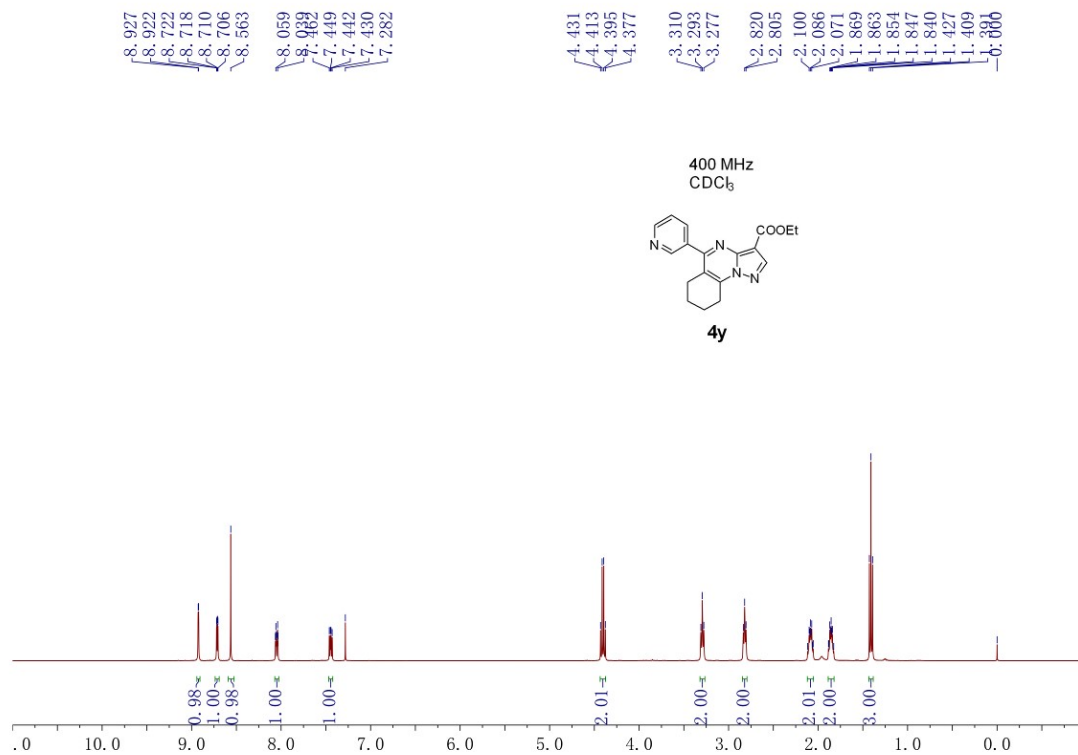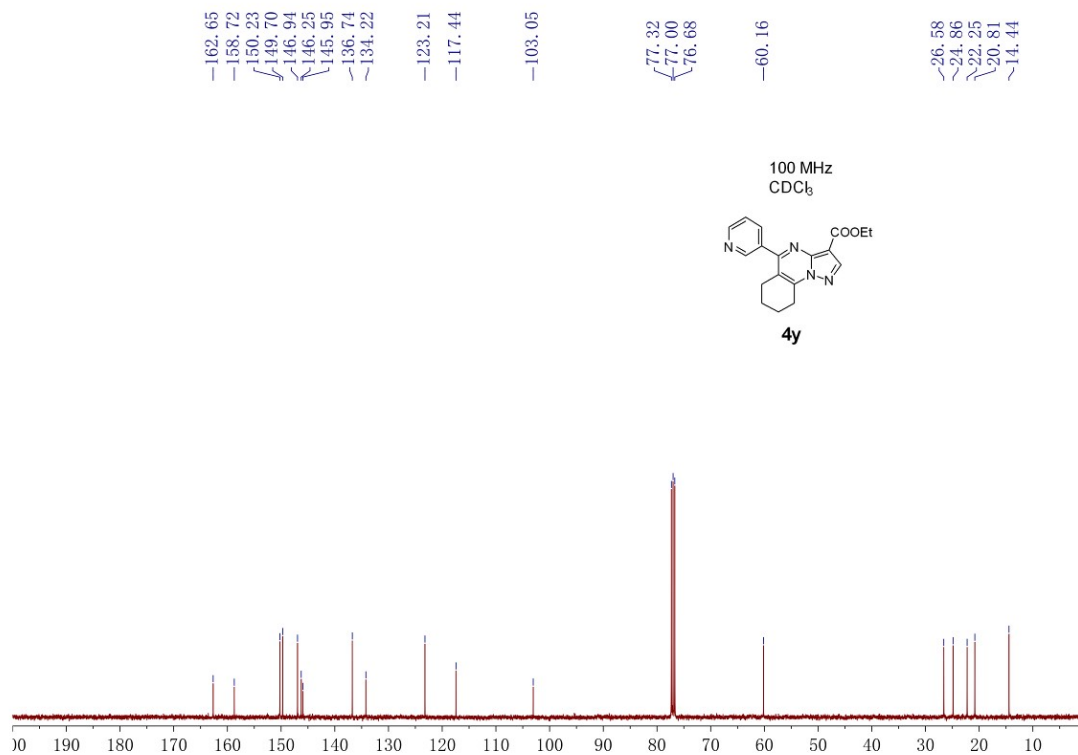

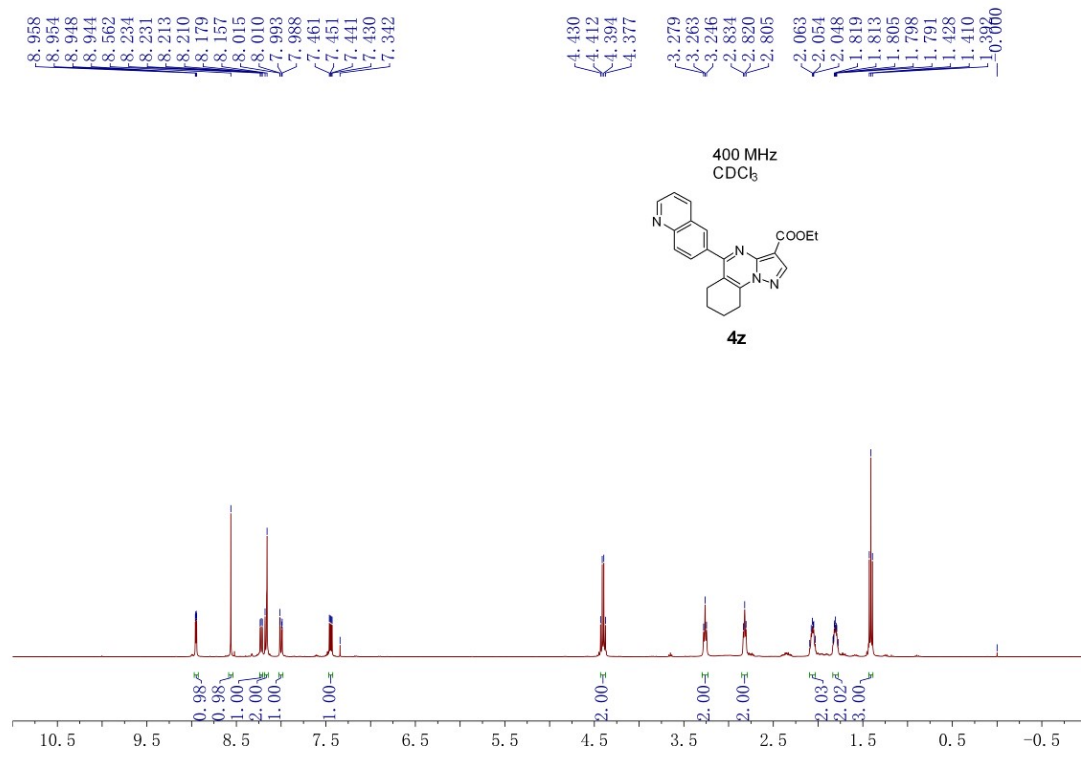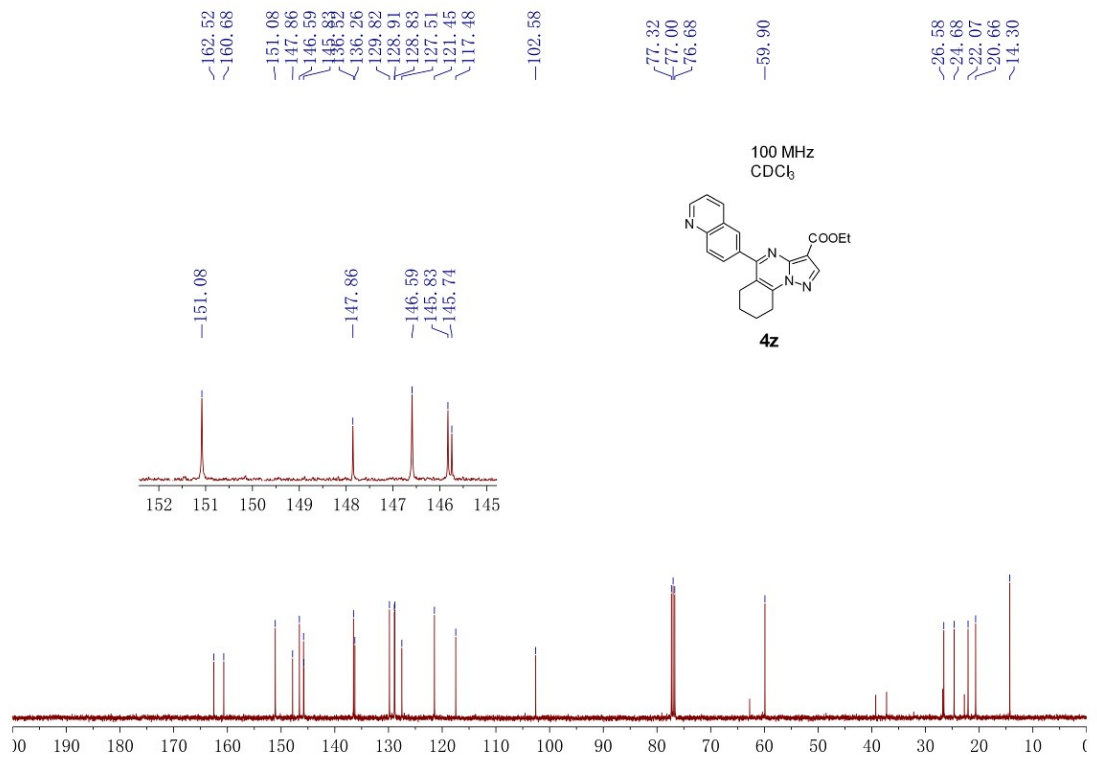

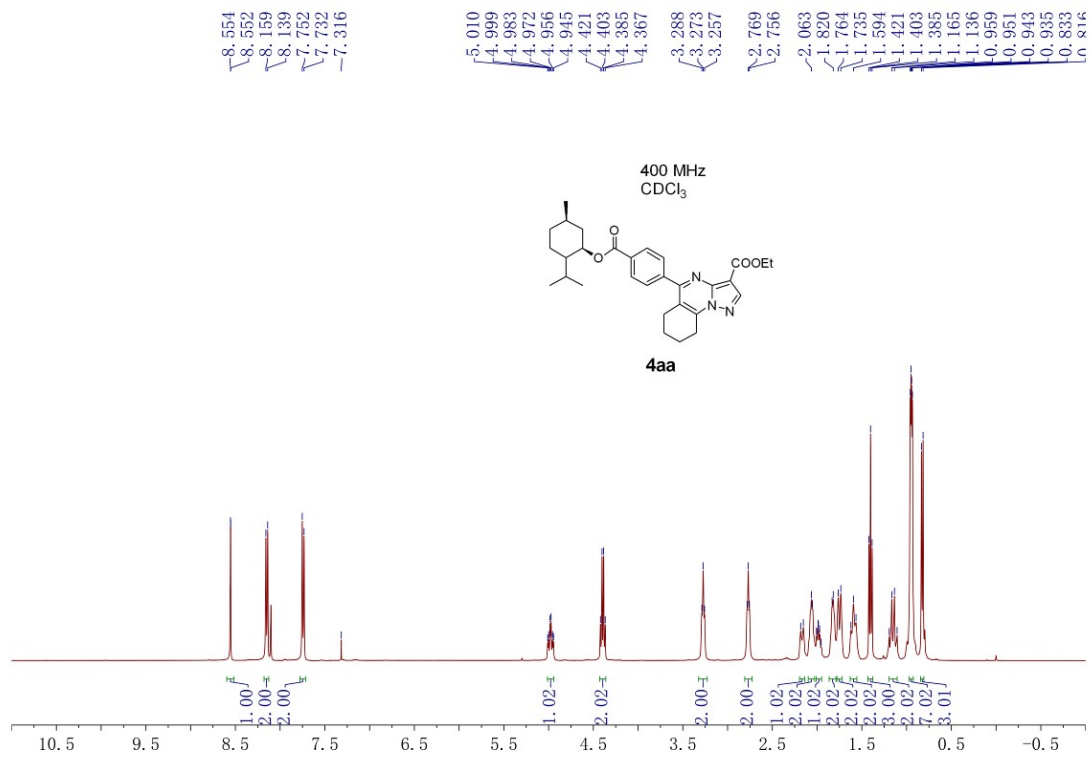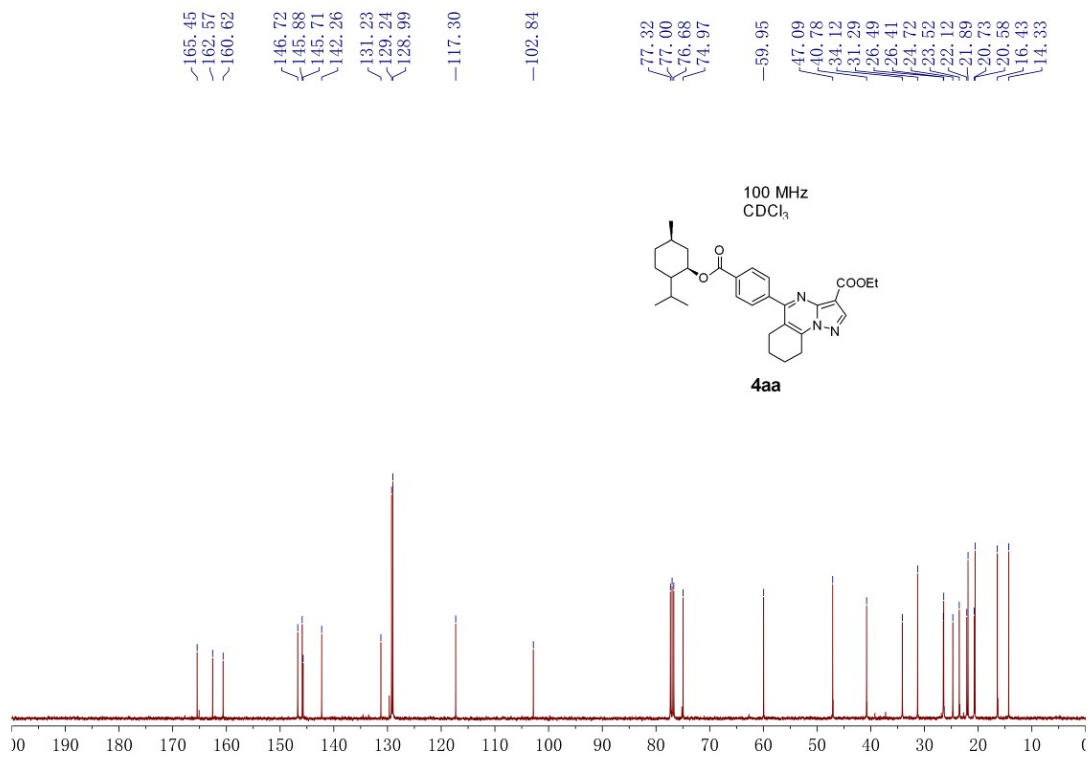

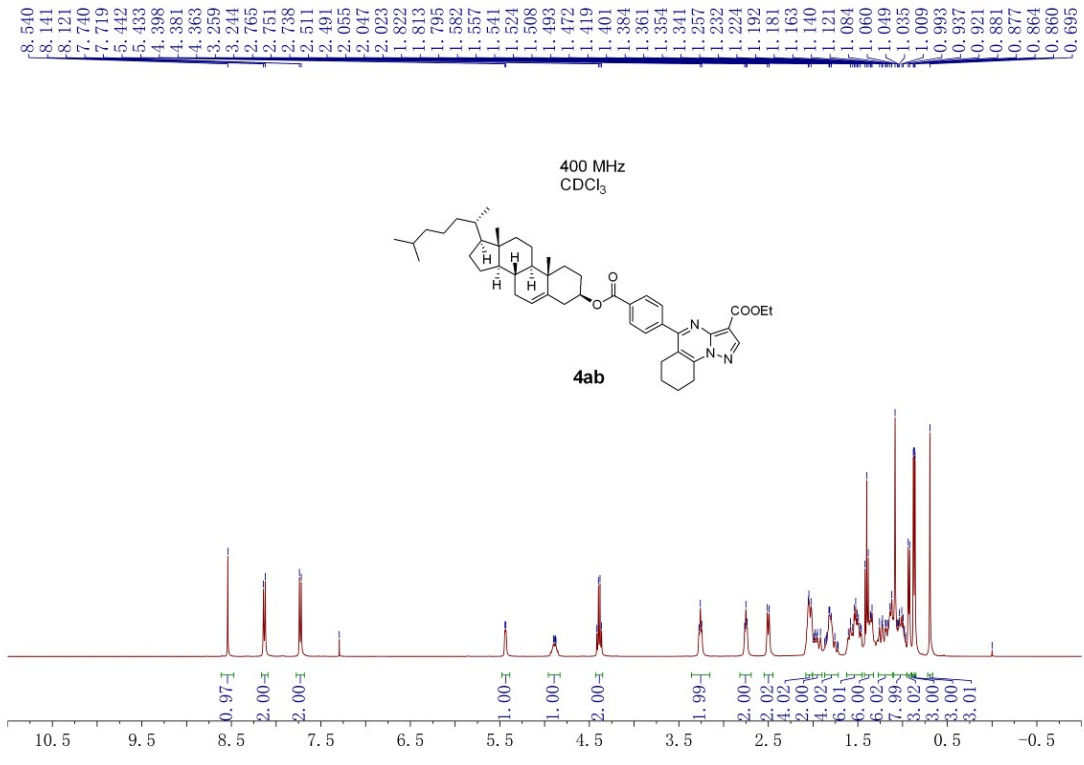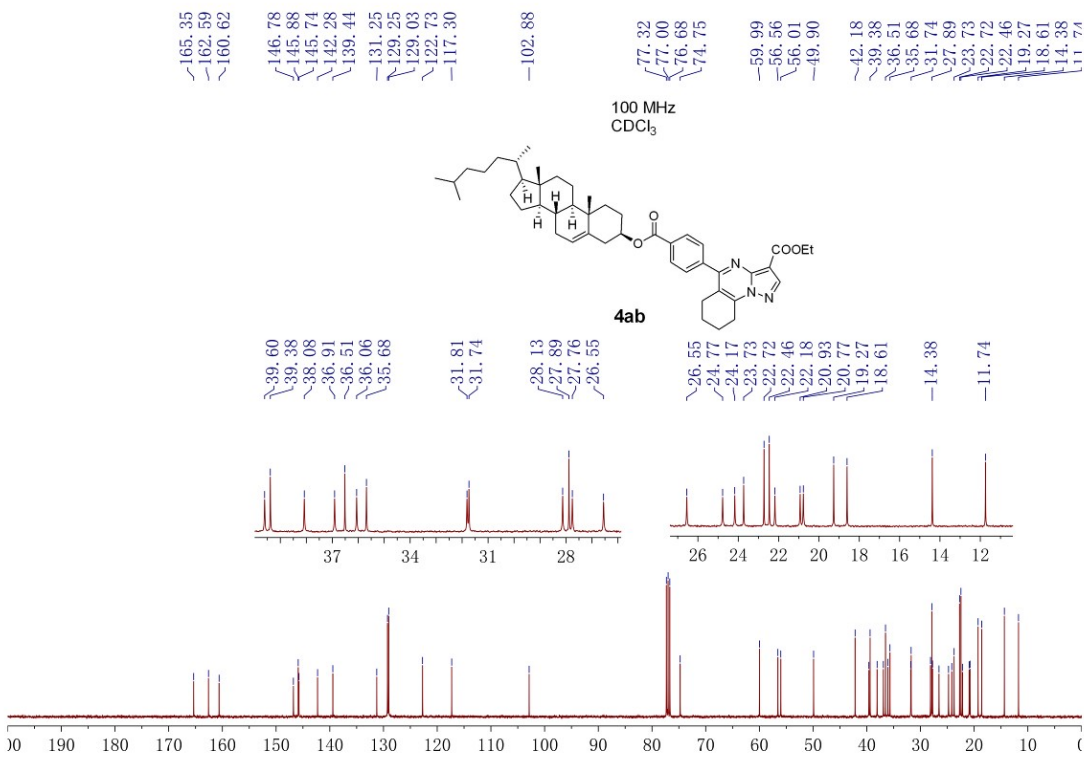

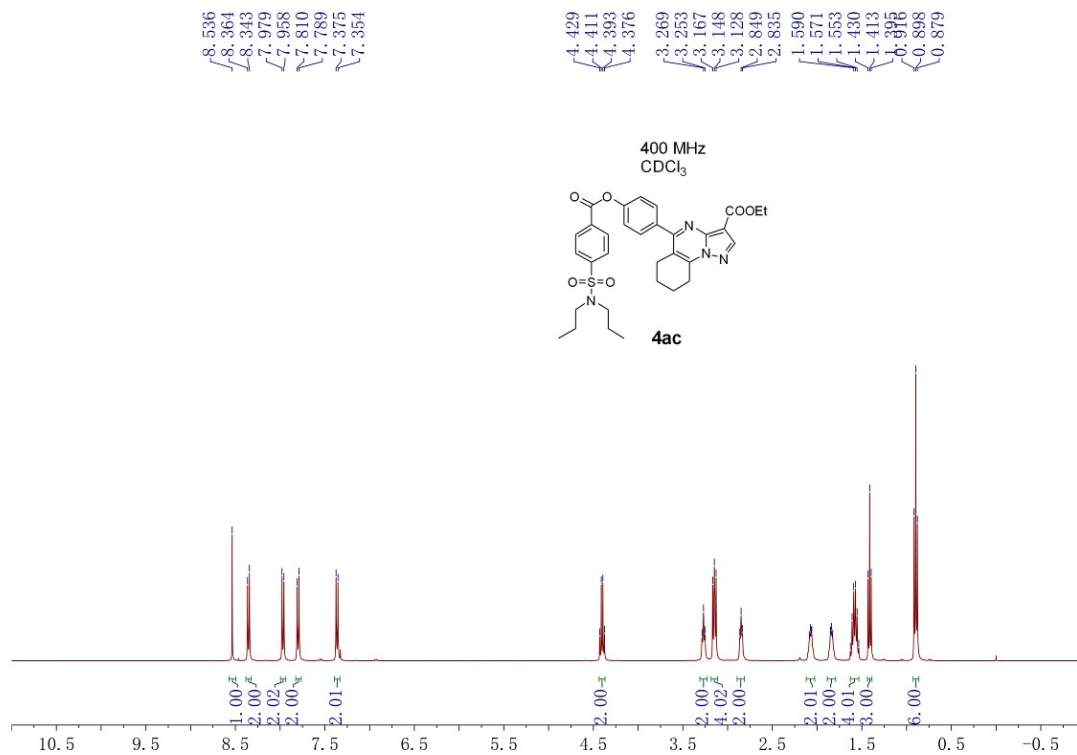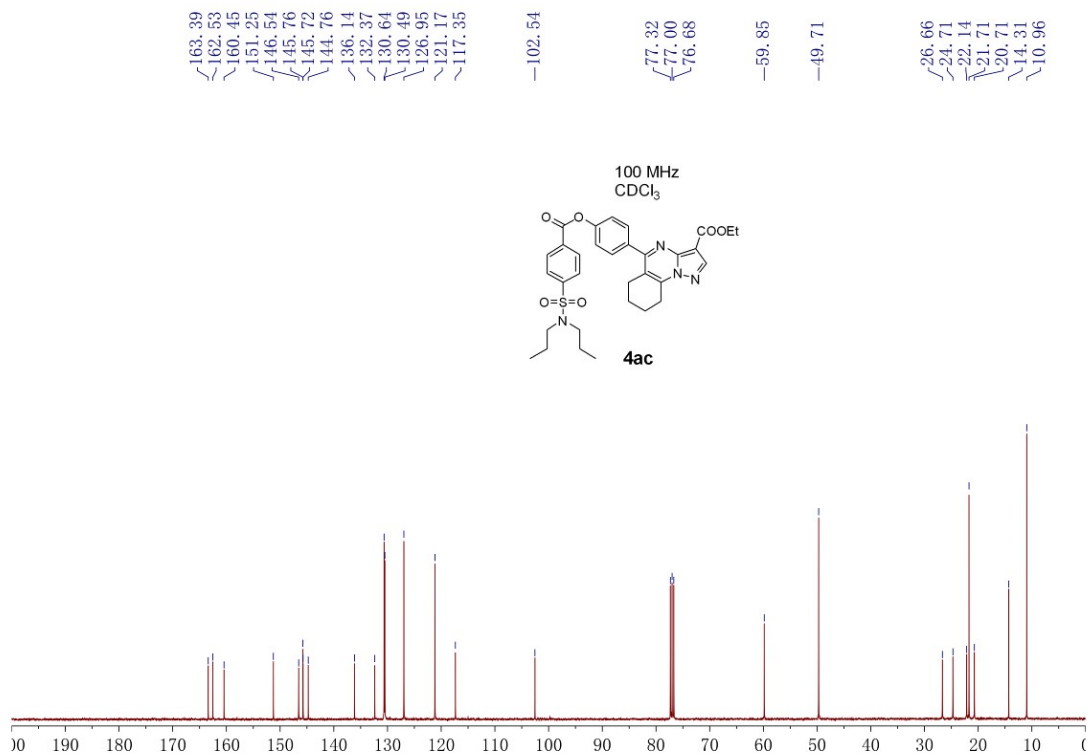

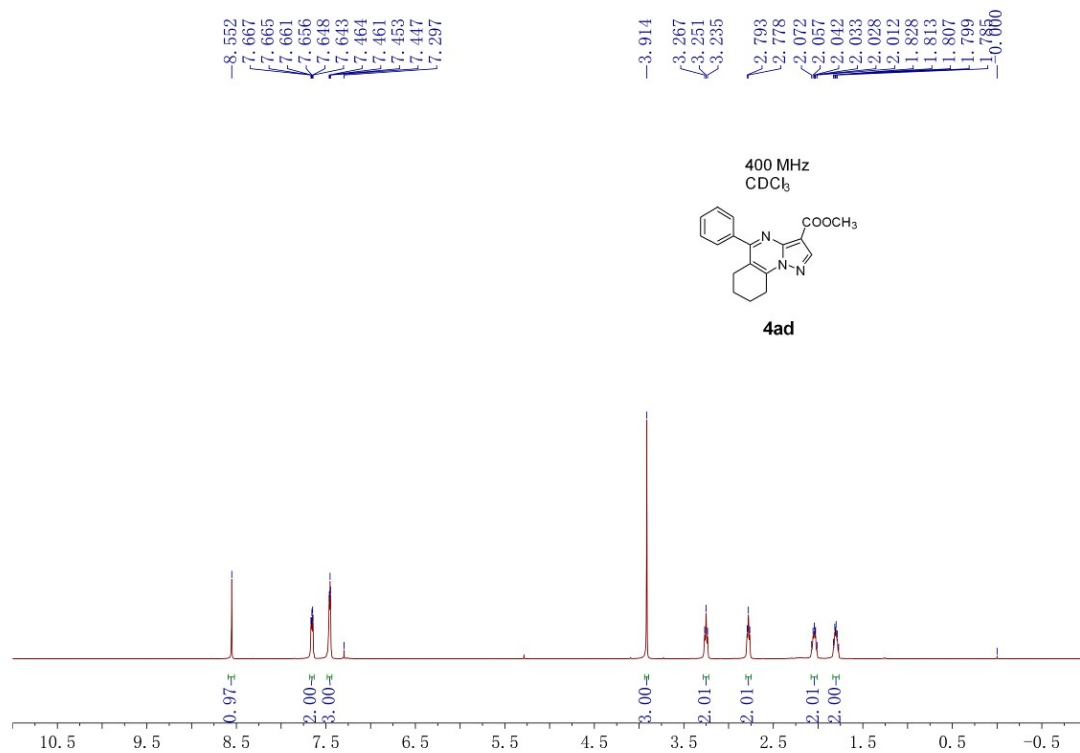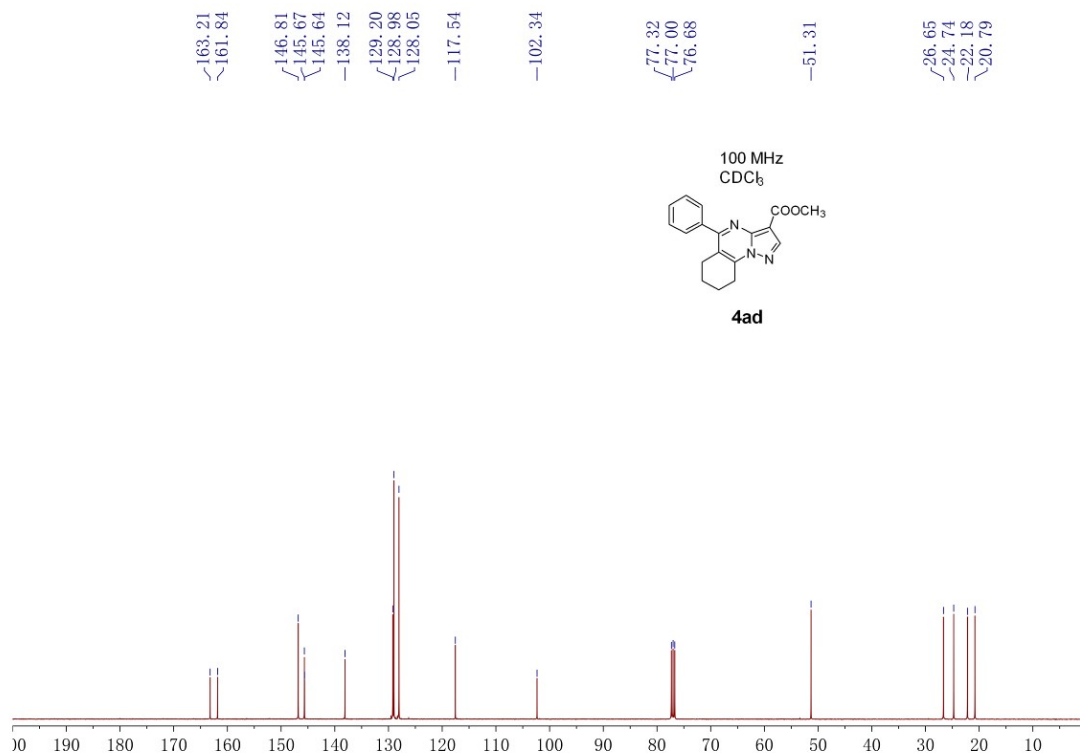

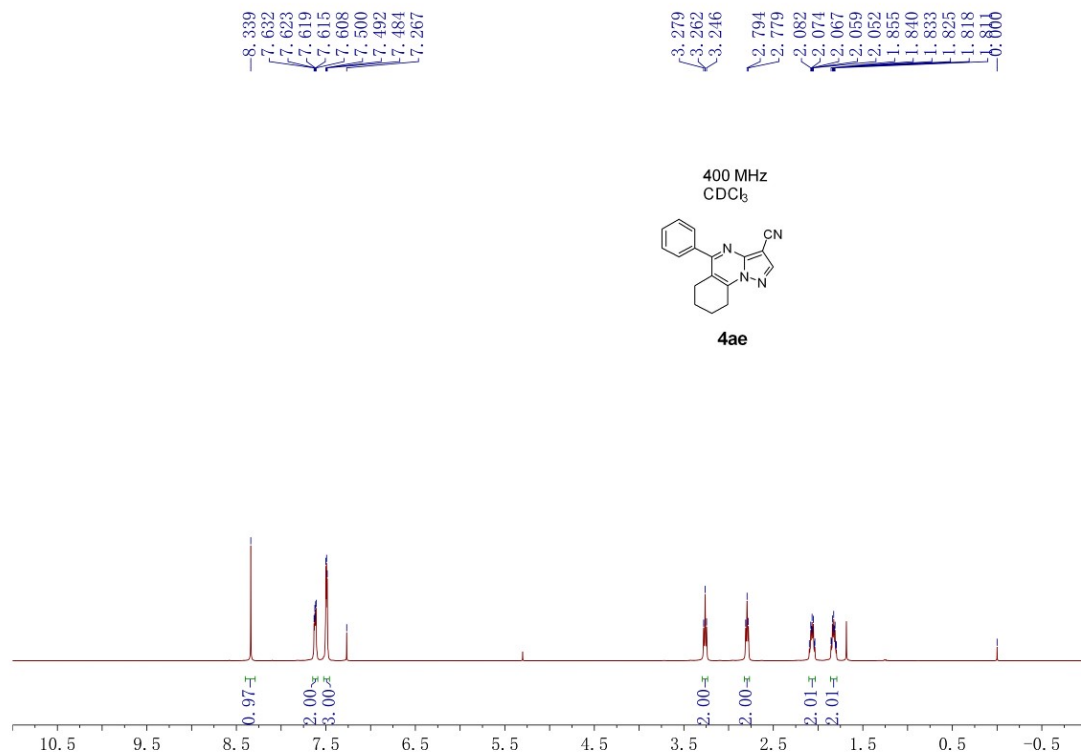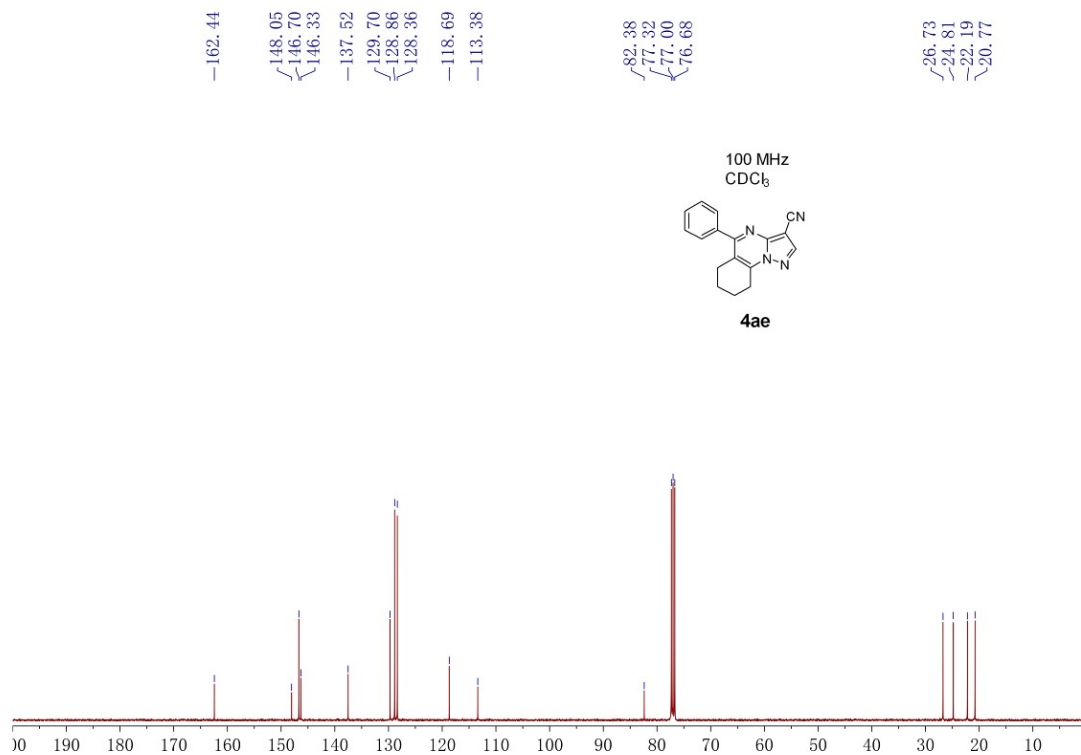



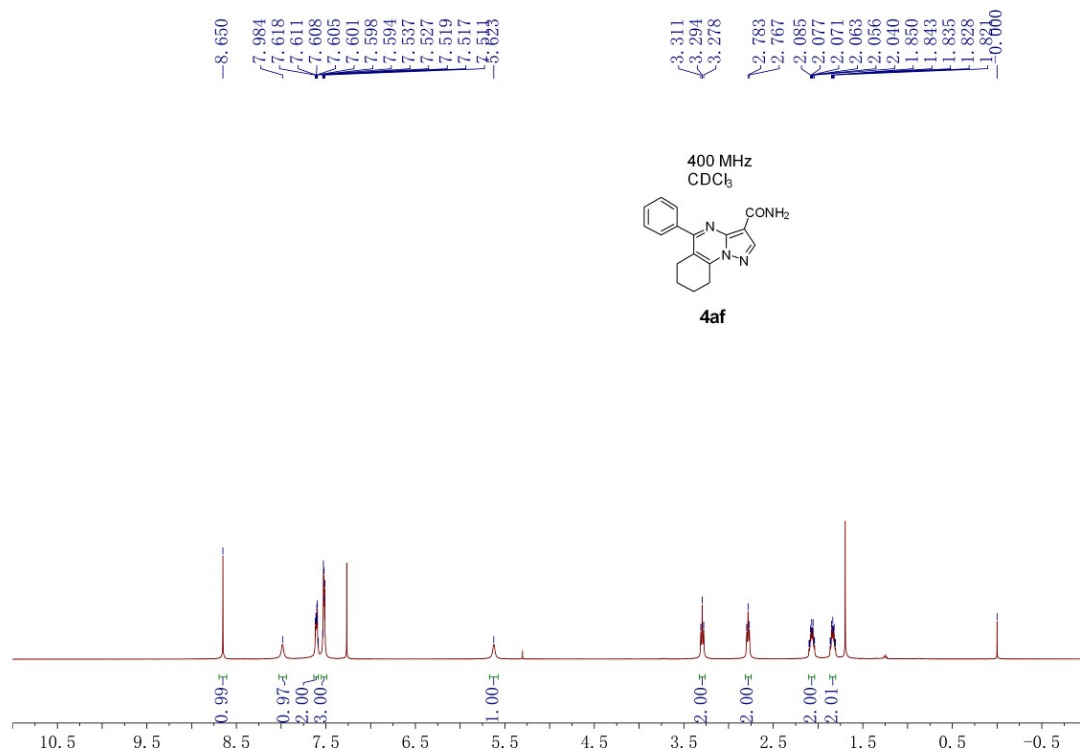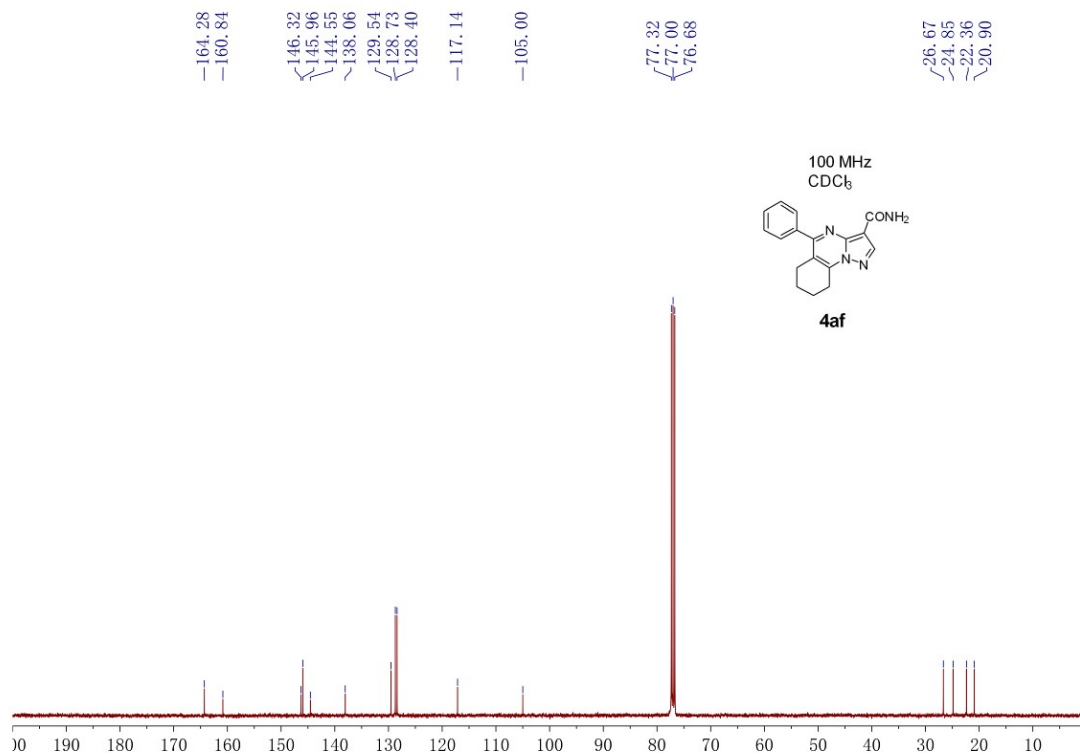

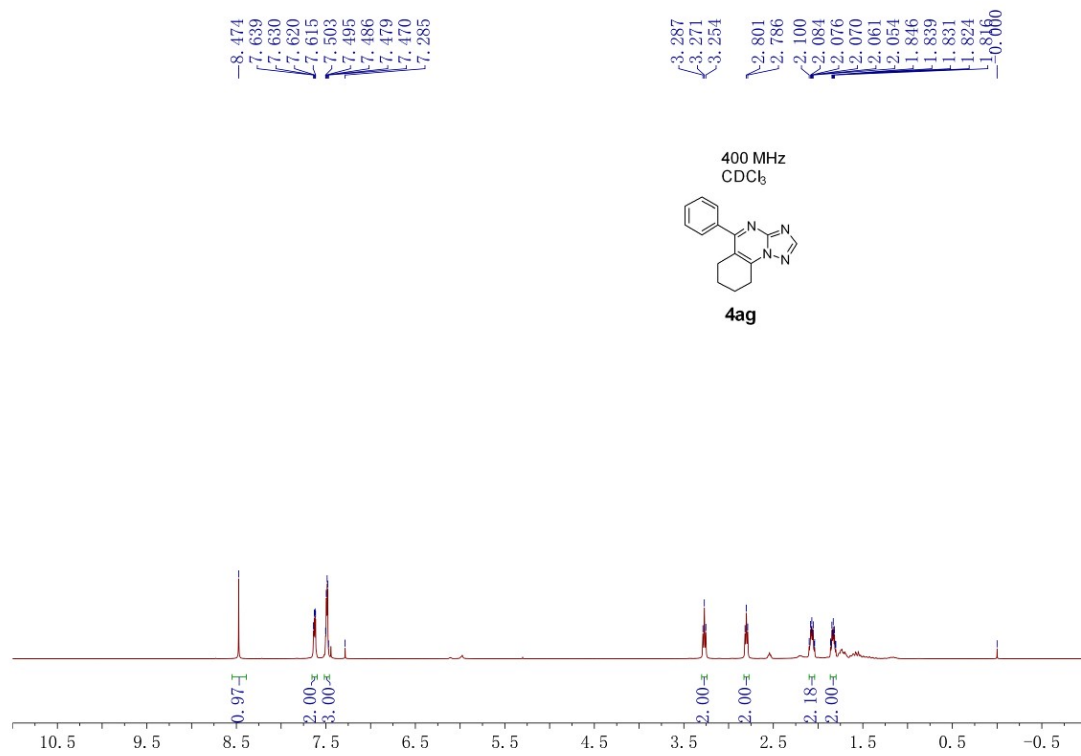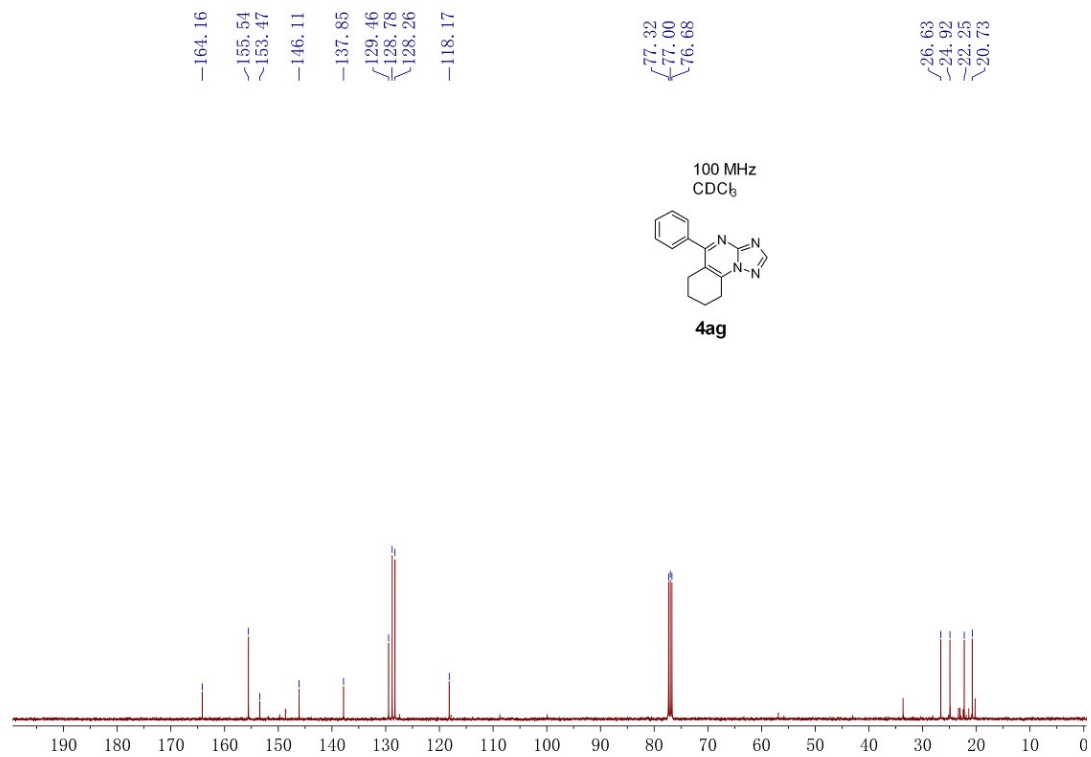

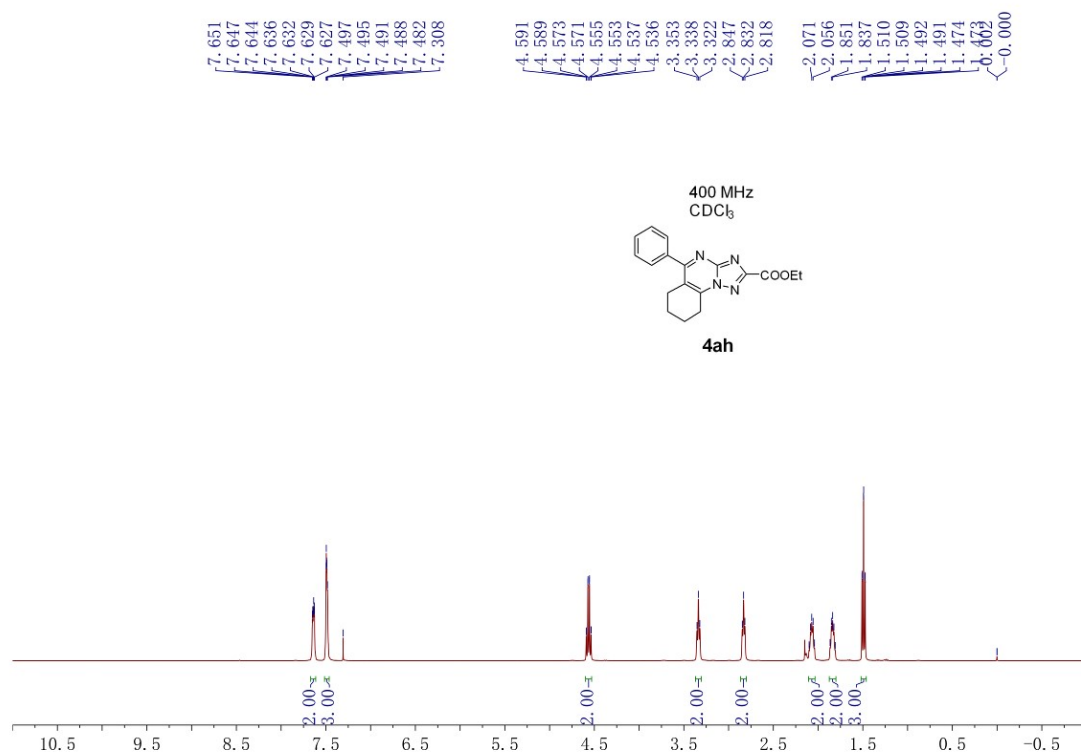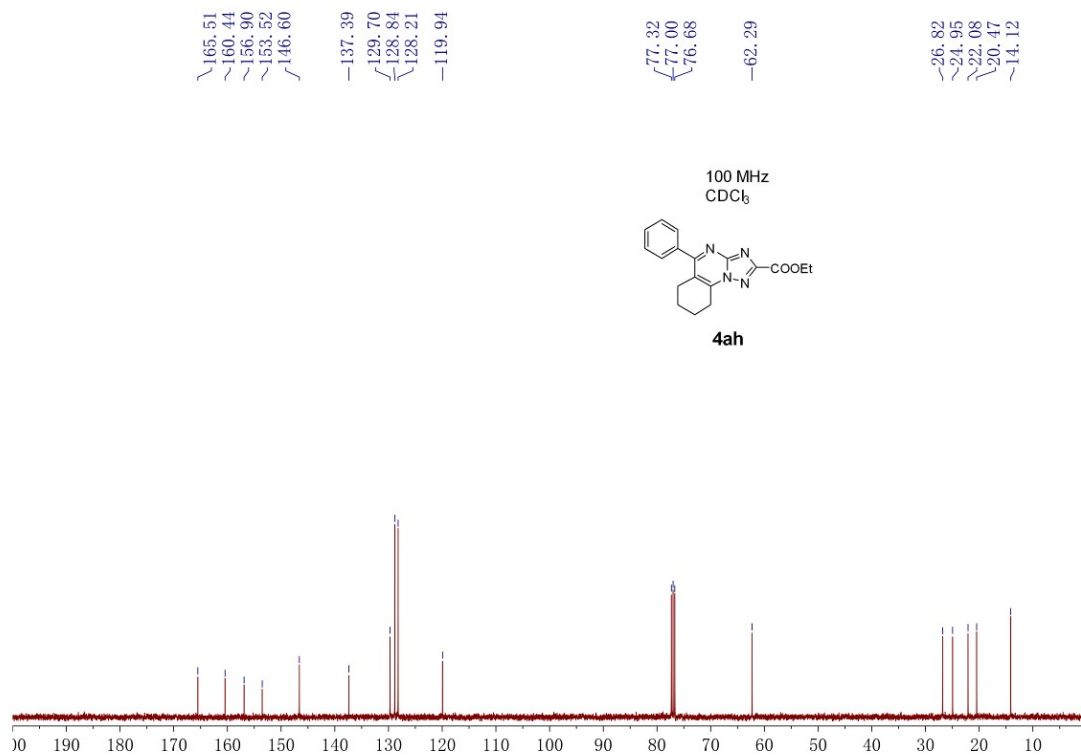

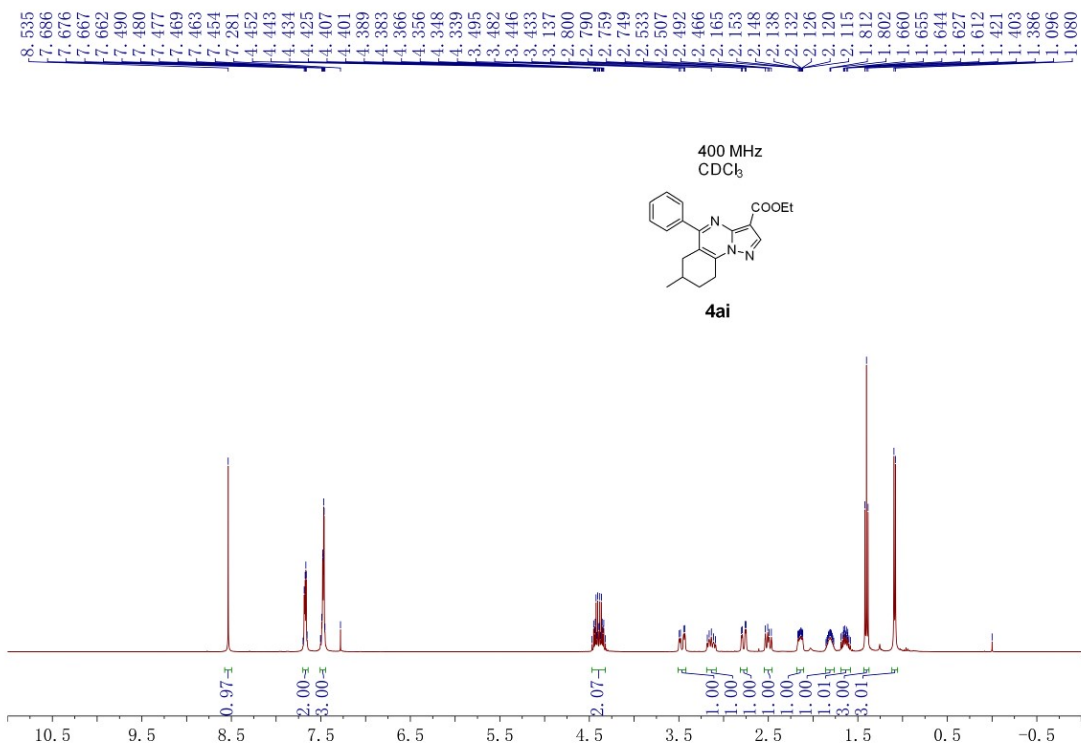

162.73  
161.68  
146.68  
145.91  
145.43  
138.24  
129.25  
129.12  
128.11  
117.07  
102.64  
77.32  
77.00  
76.68  
59.96  
34.85  
28.85  
24.91  
21.18  
14.41

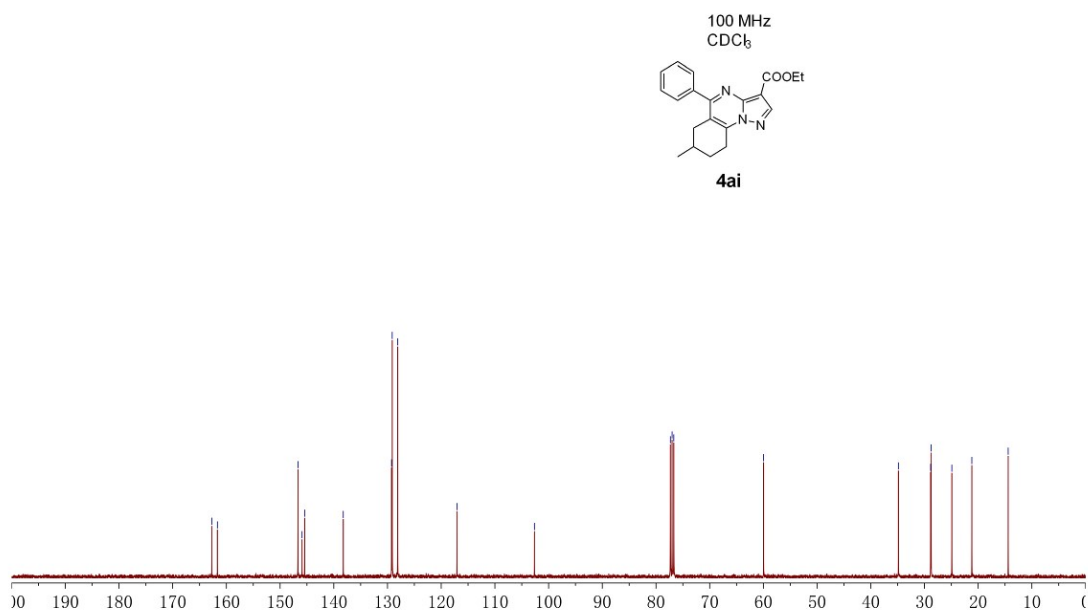

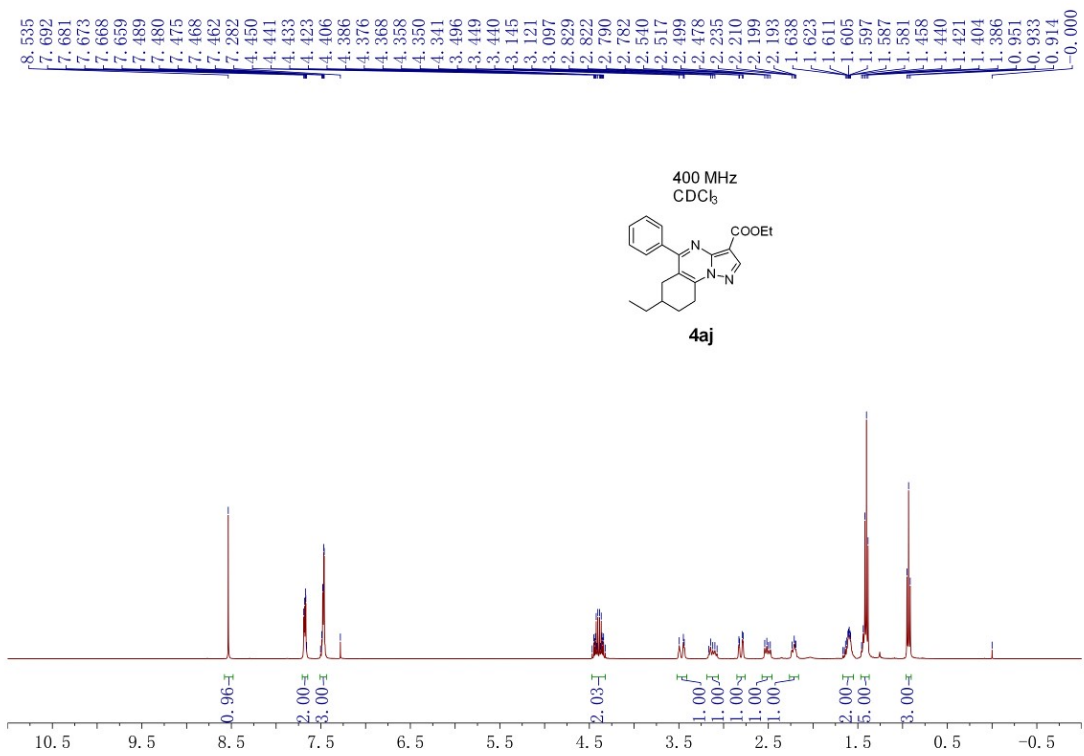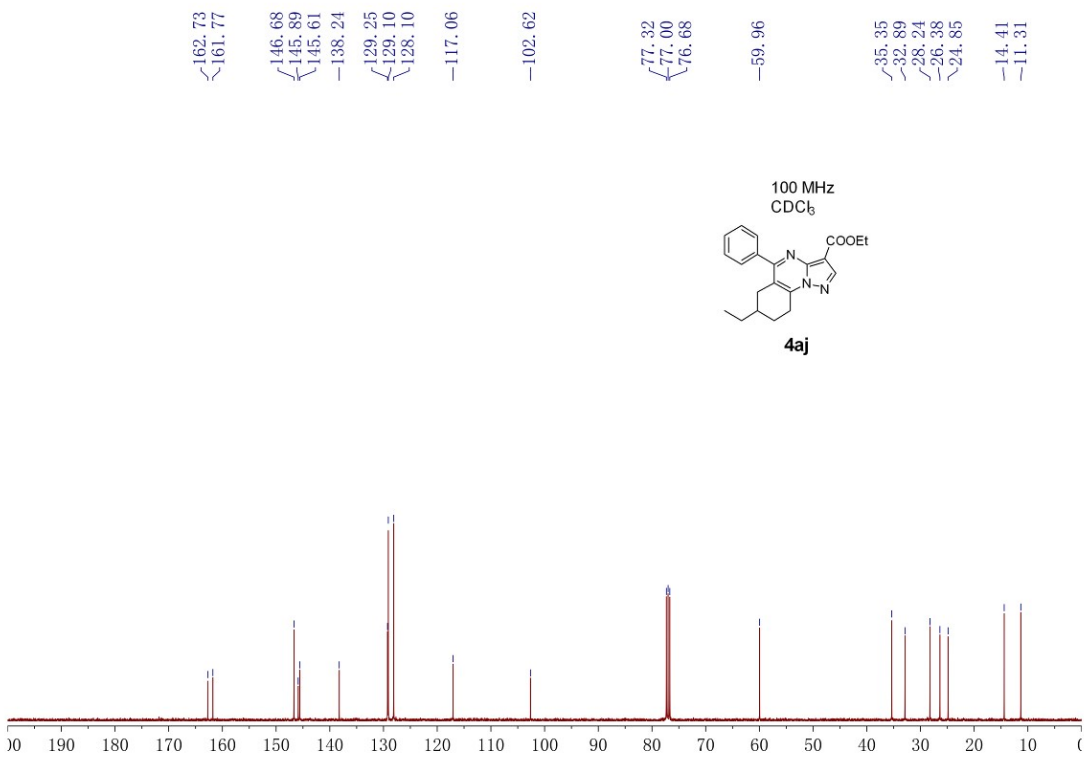

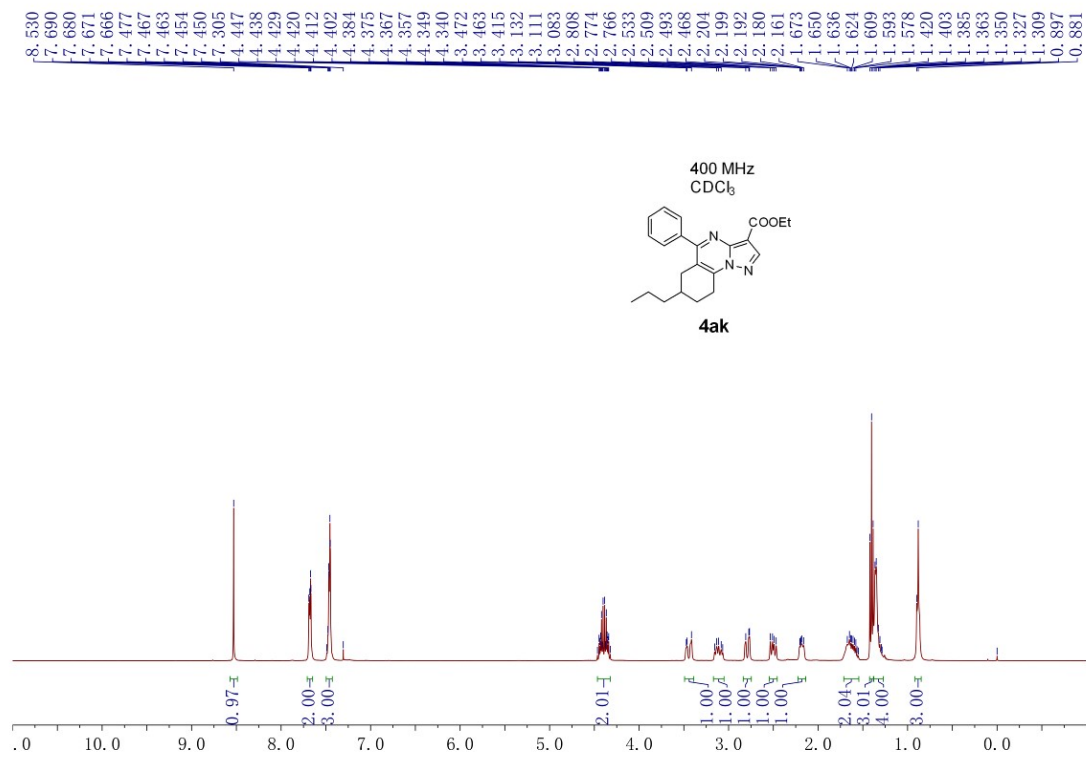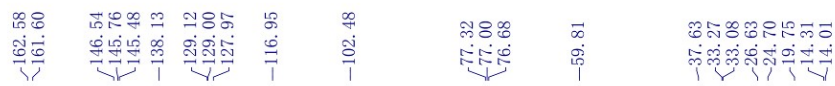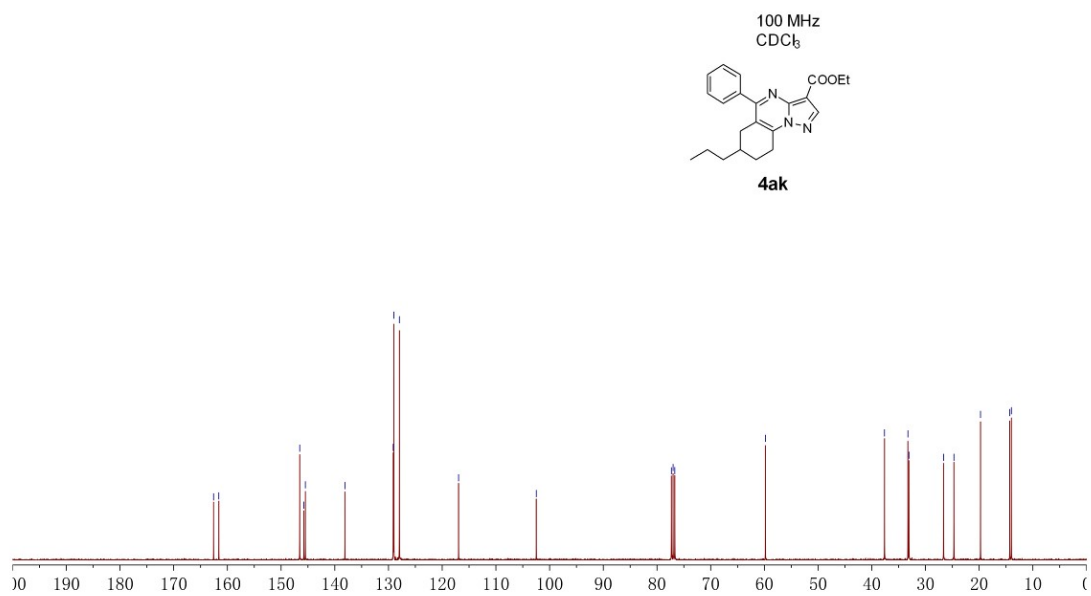

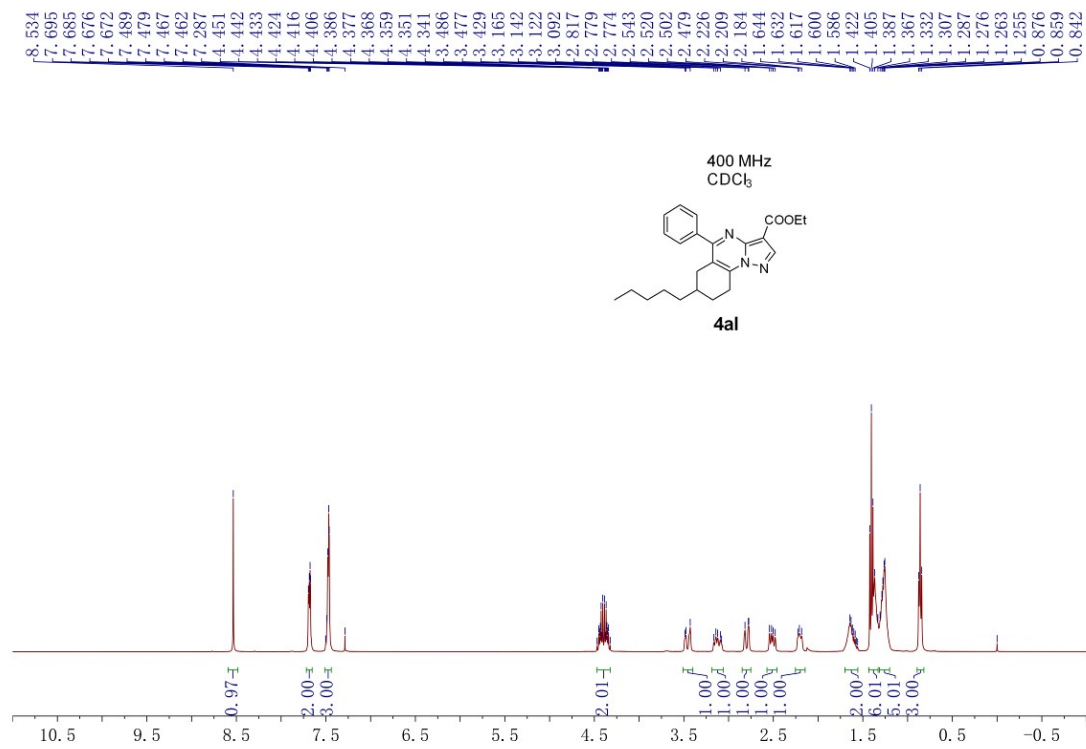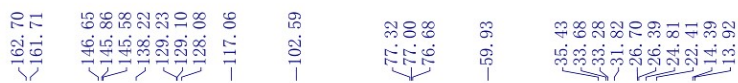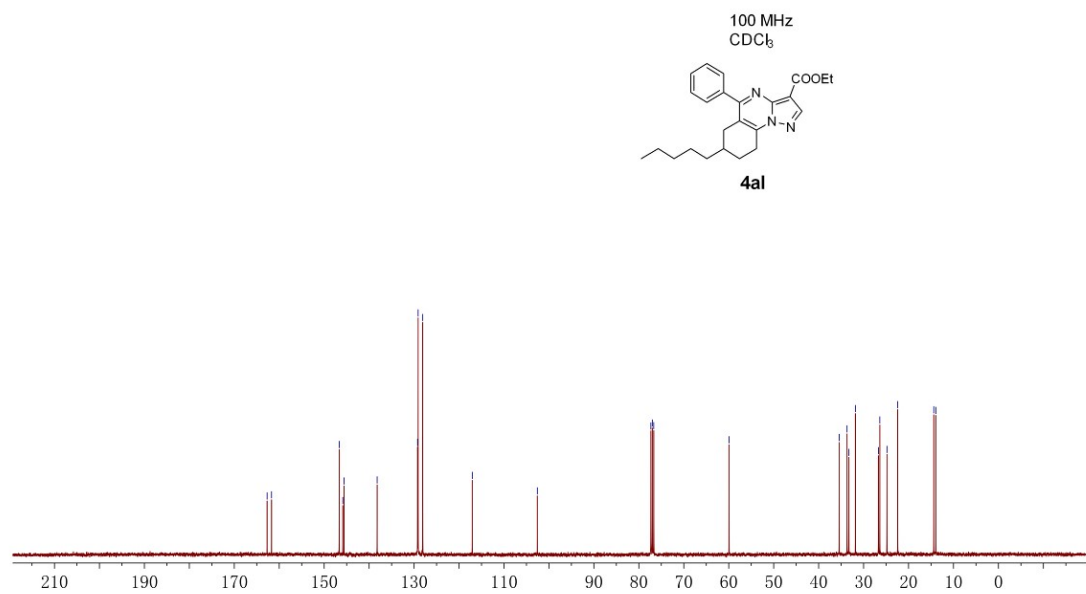

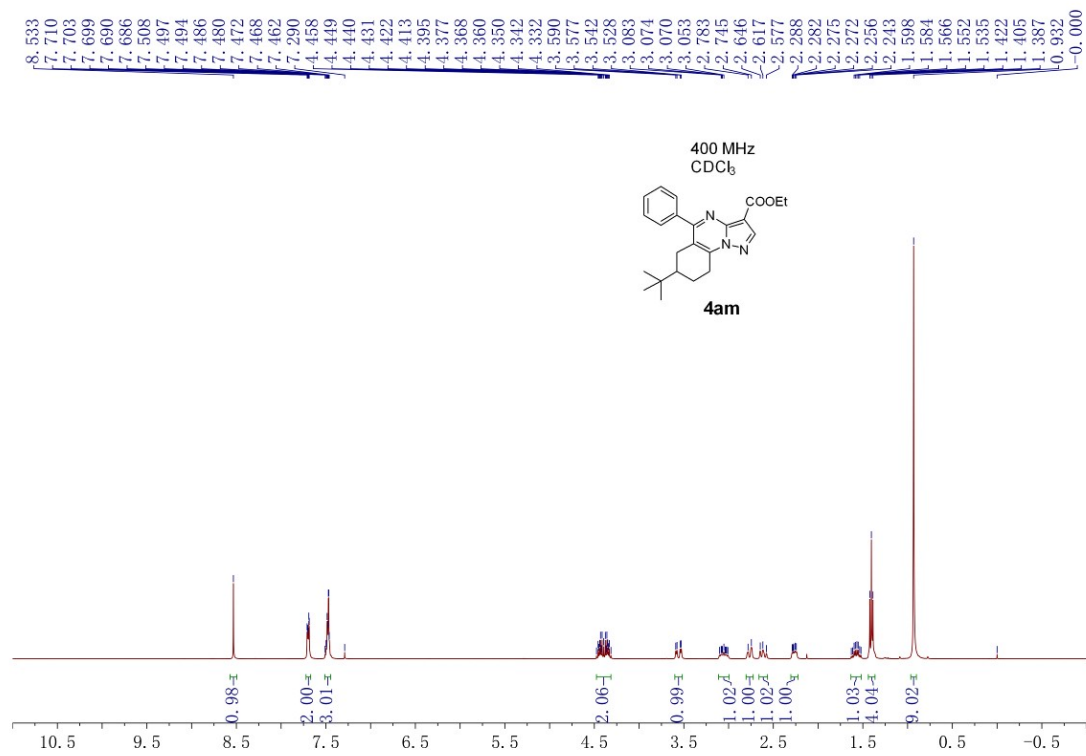

162.69  
161.93  
146.62  
145.79  
145.46  
138.20  
129.26  
129.03  
128.08  
117.59  
102.51  
77.32  
77.00  
76.68  
59.92  
44.14  
32.23  
28.16  
27.14  
26.00  
22.23  
14.38

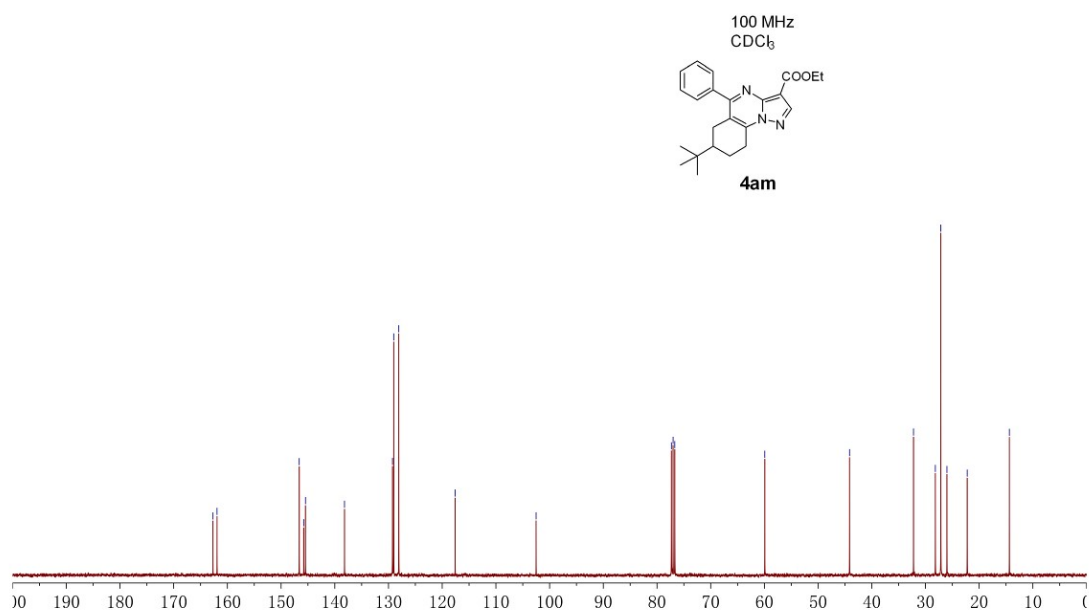



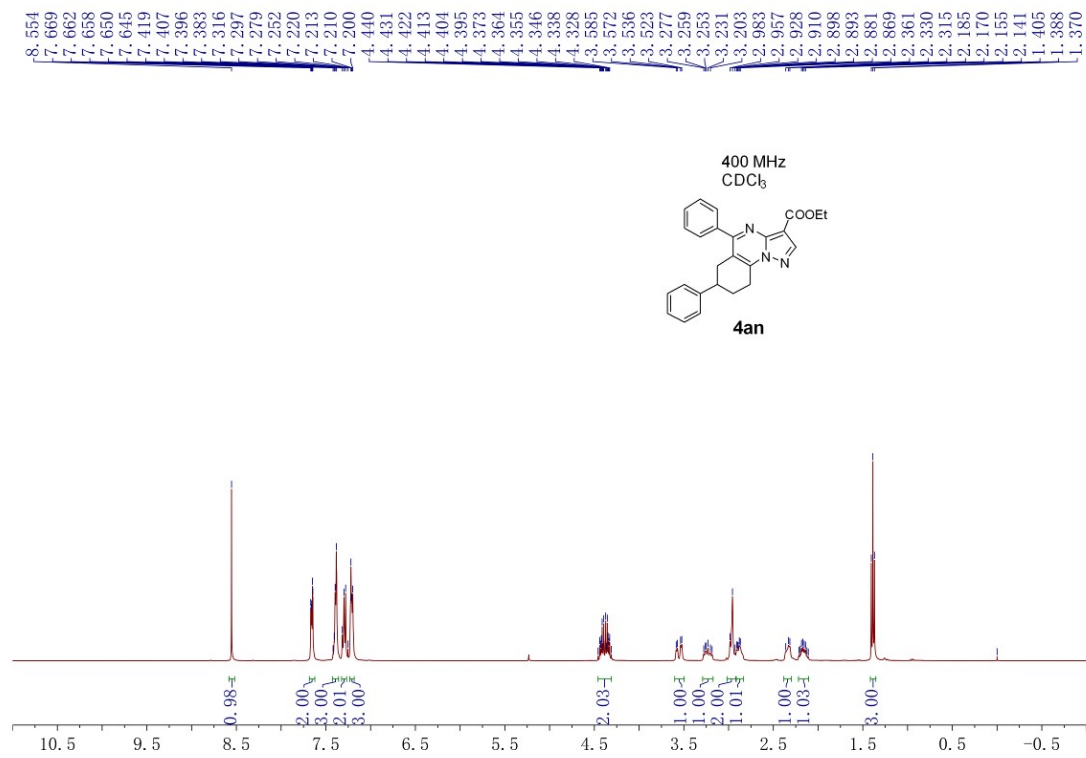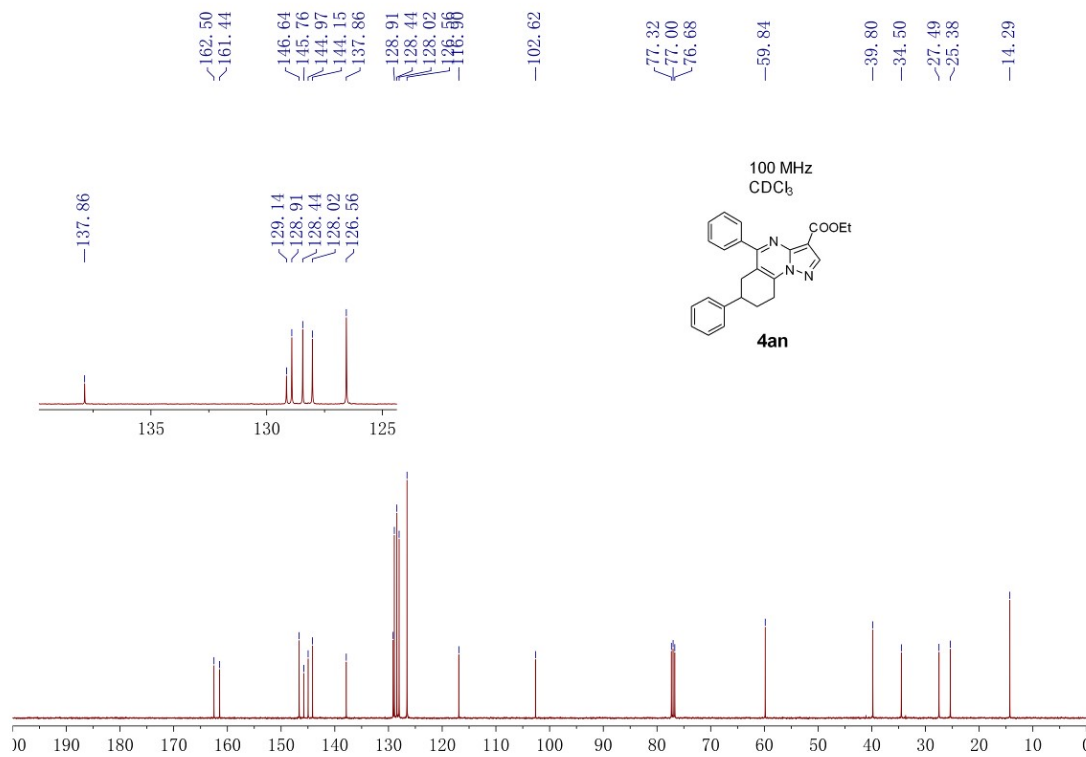

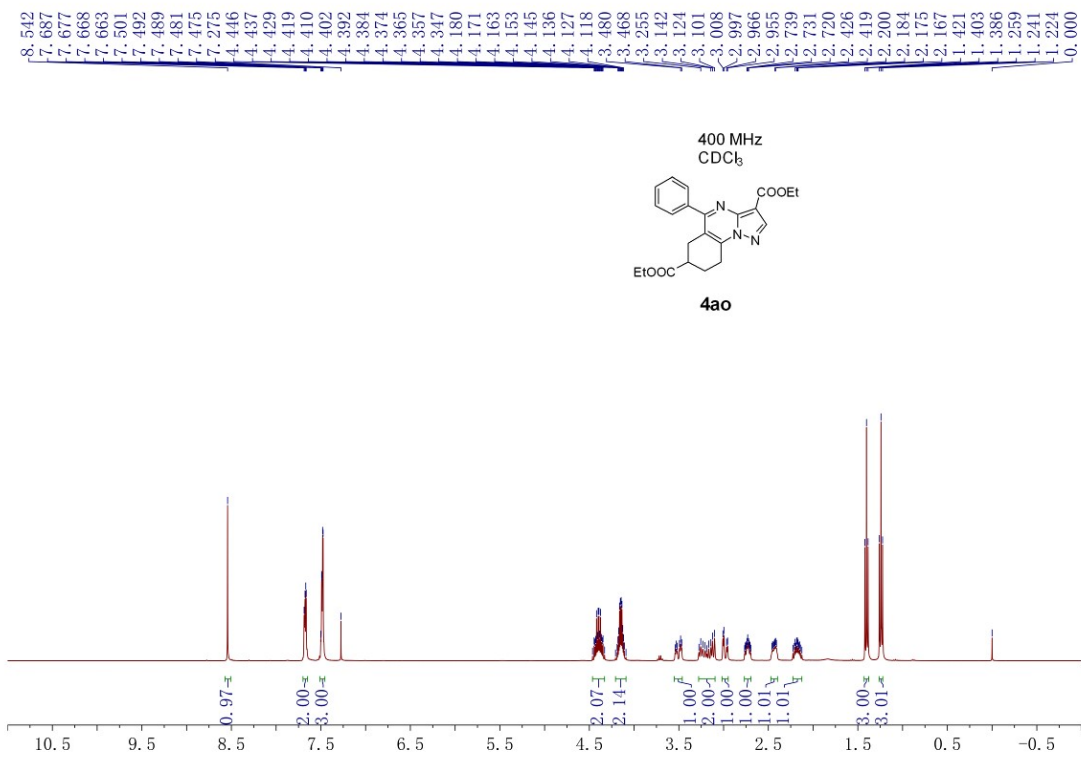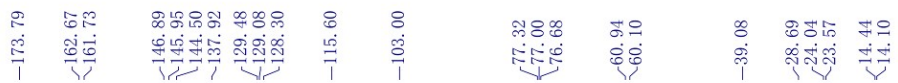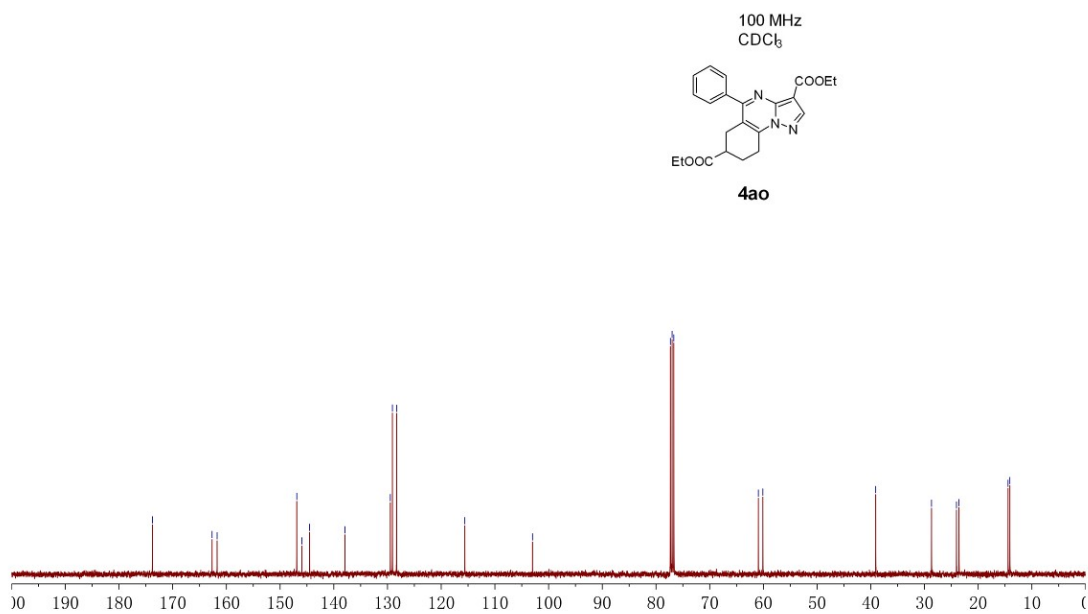

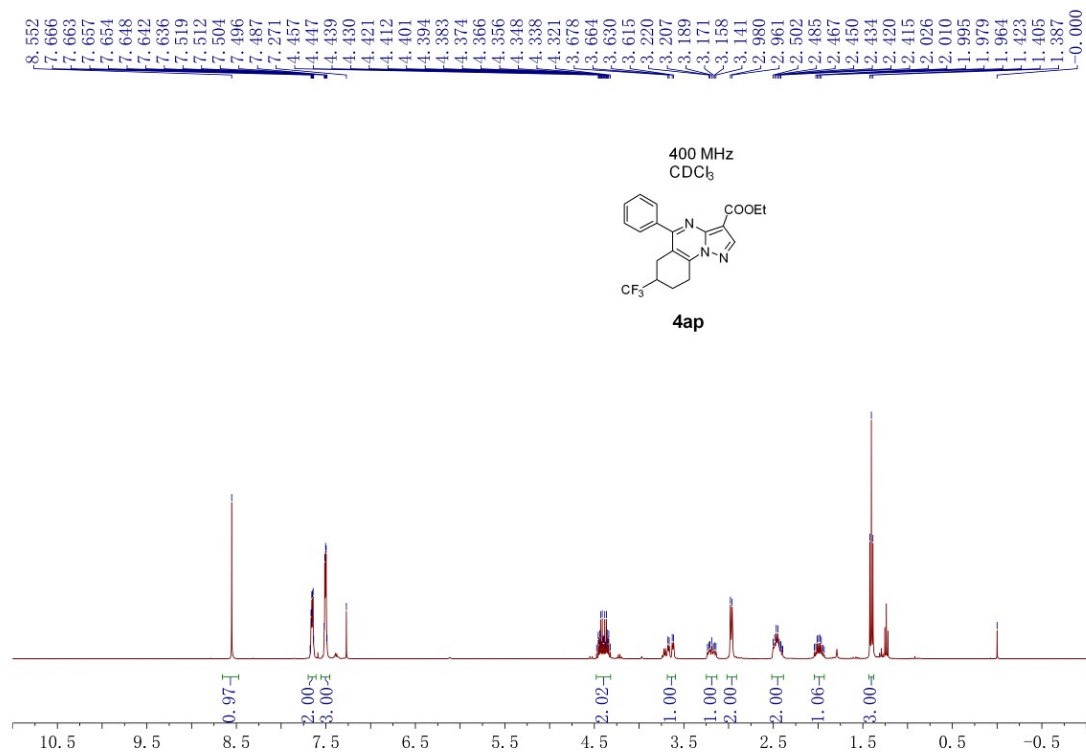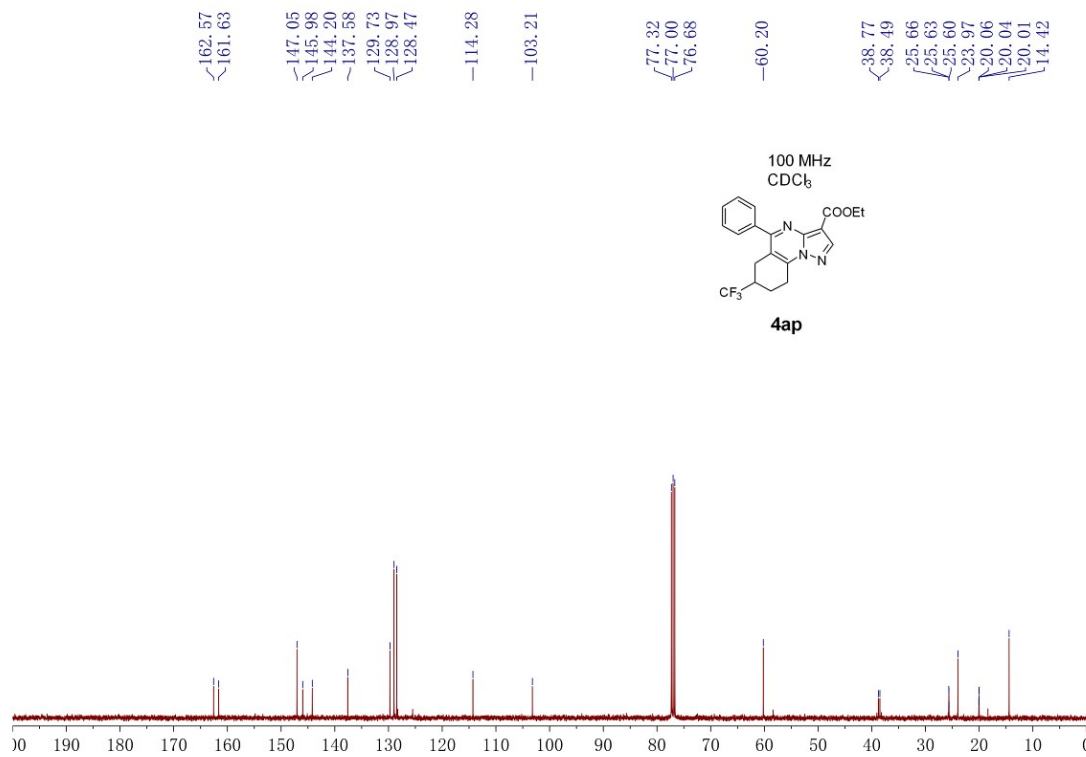

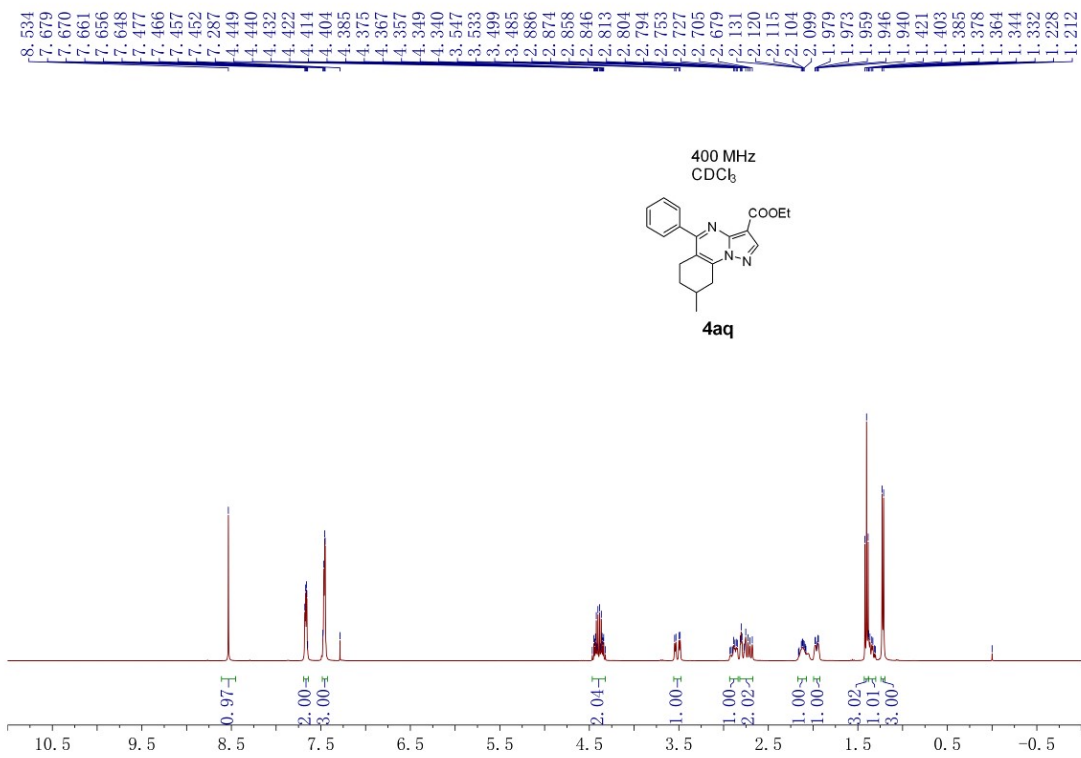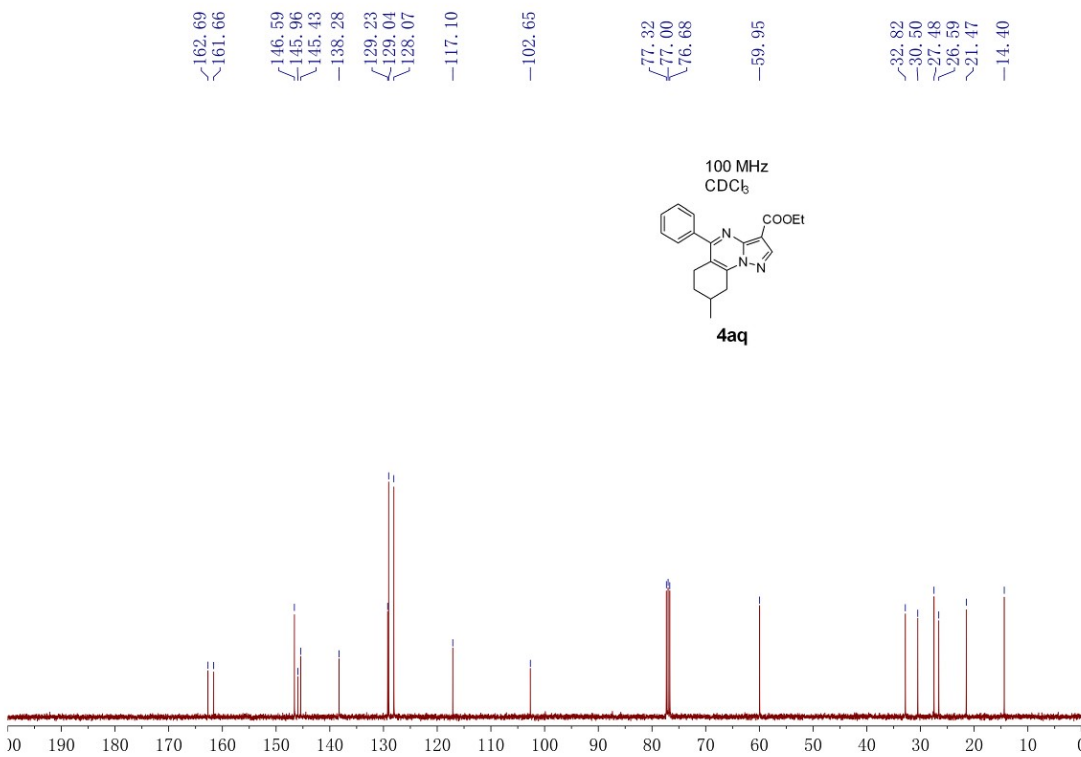

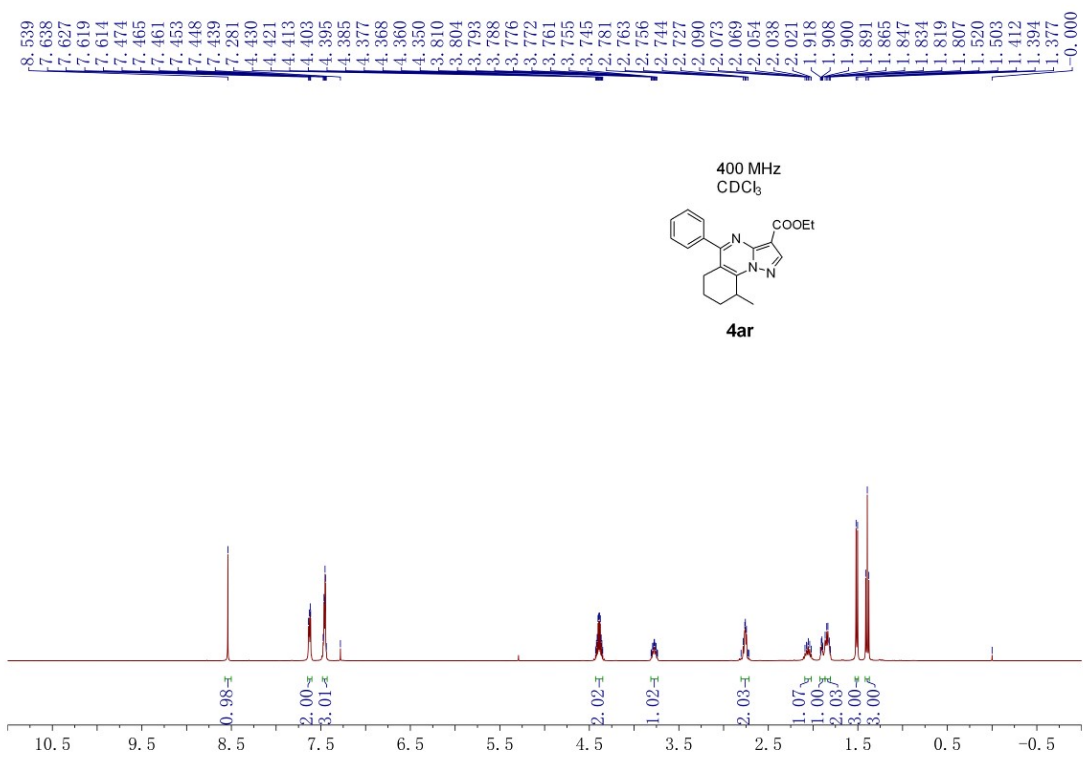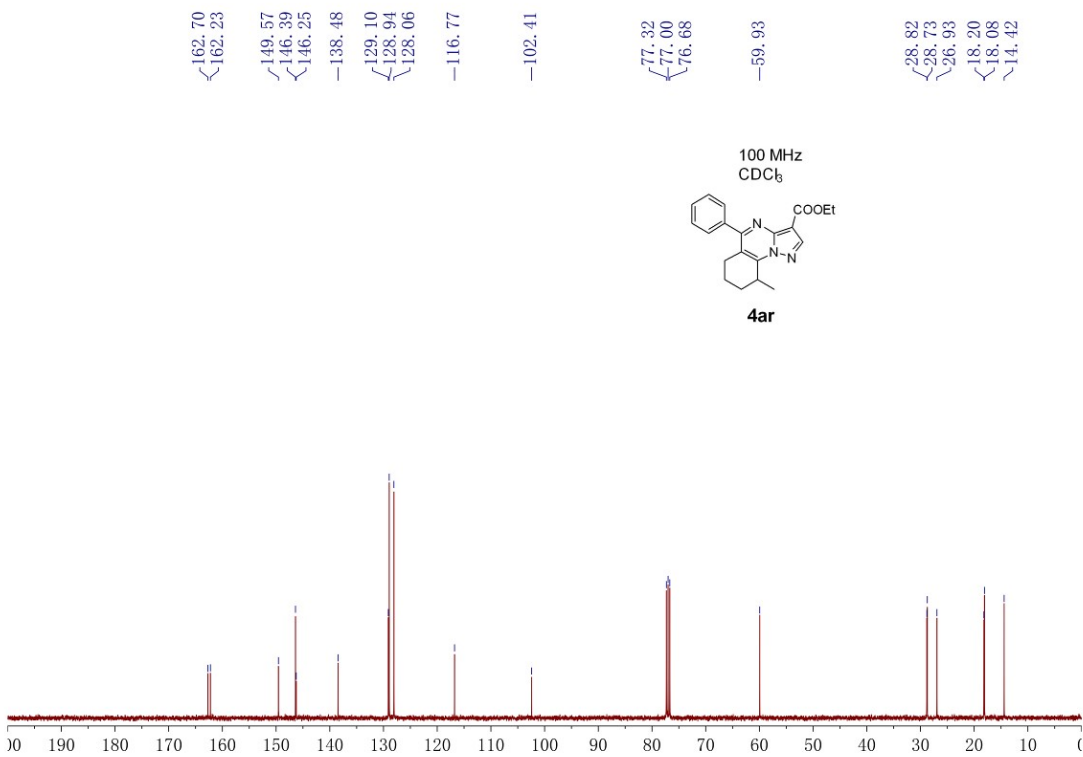

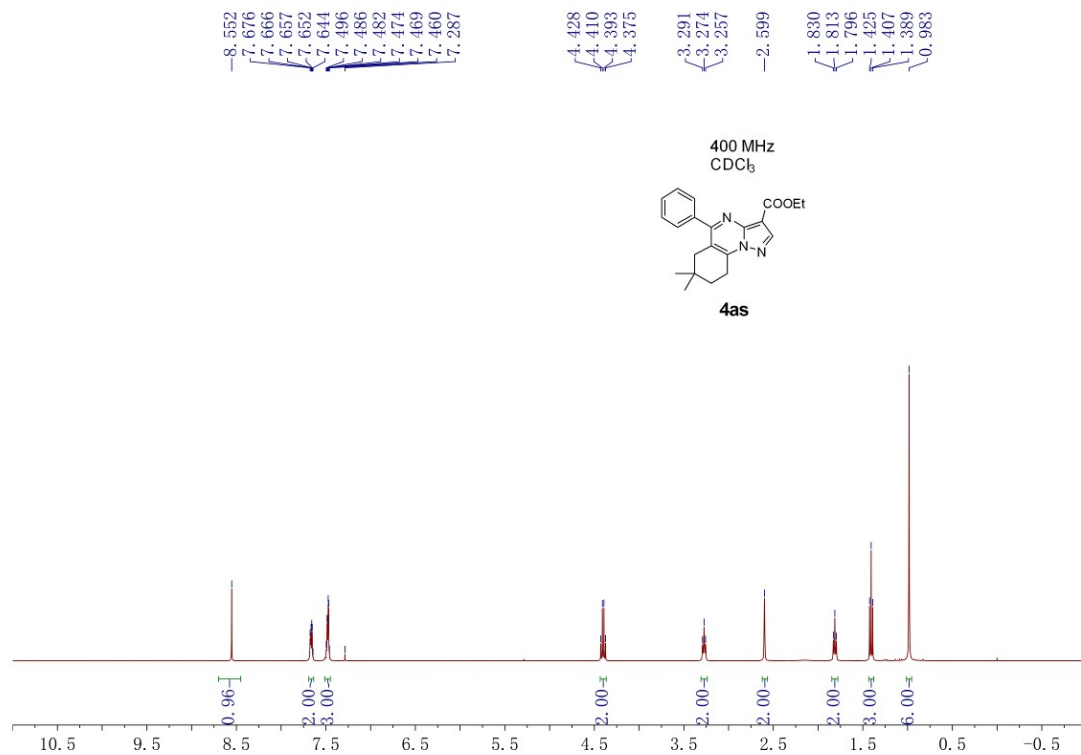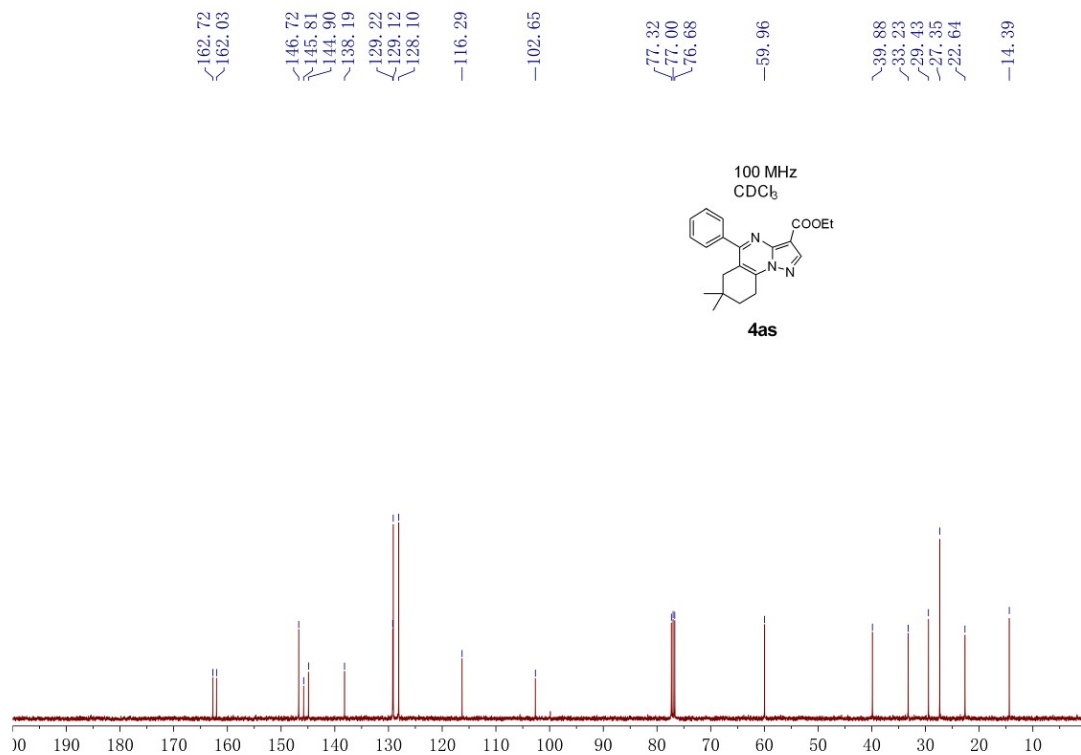

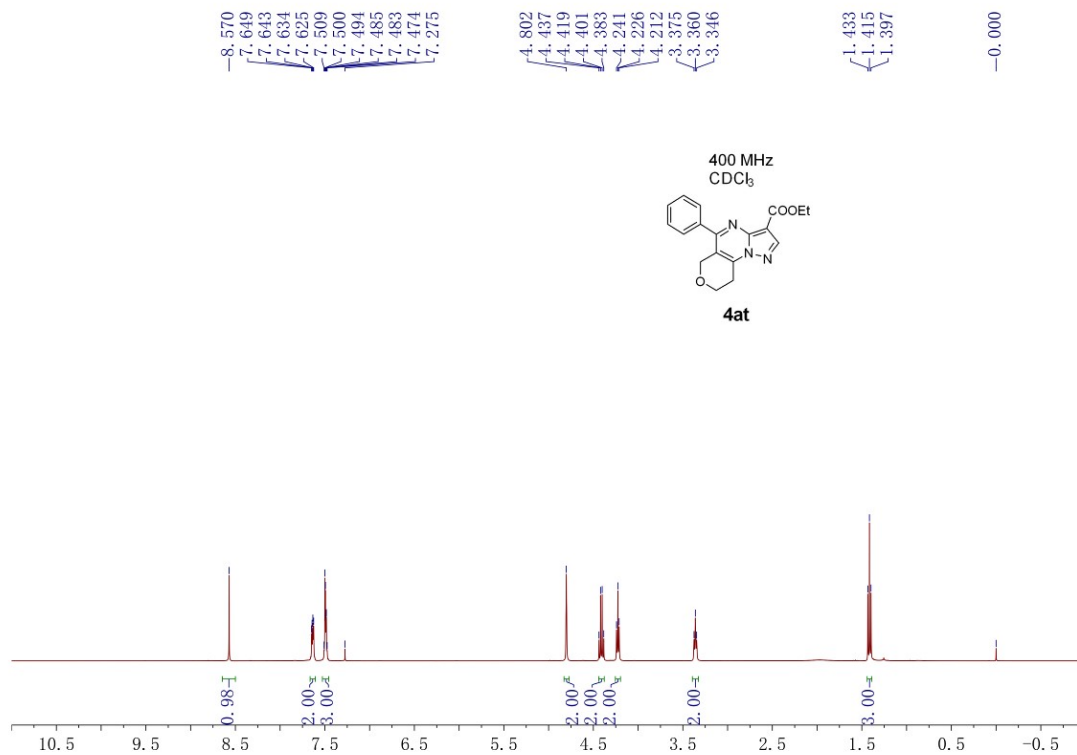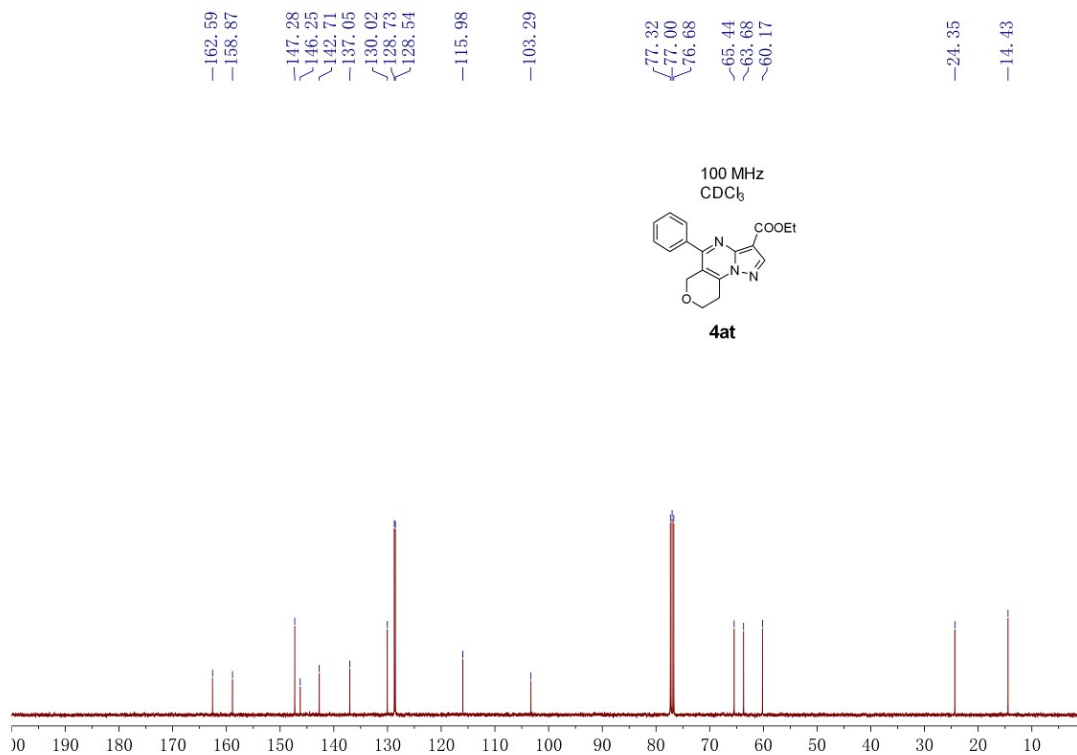

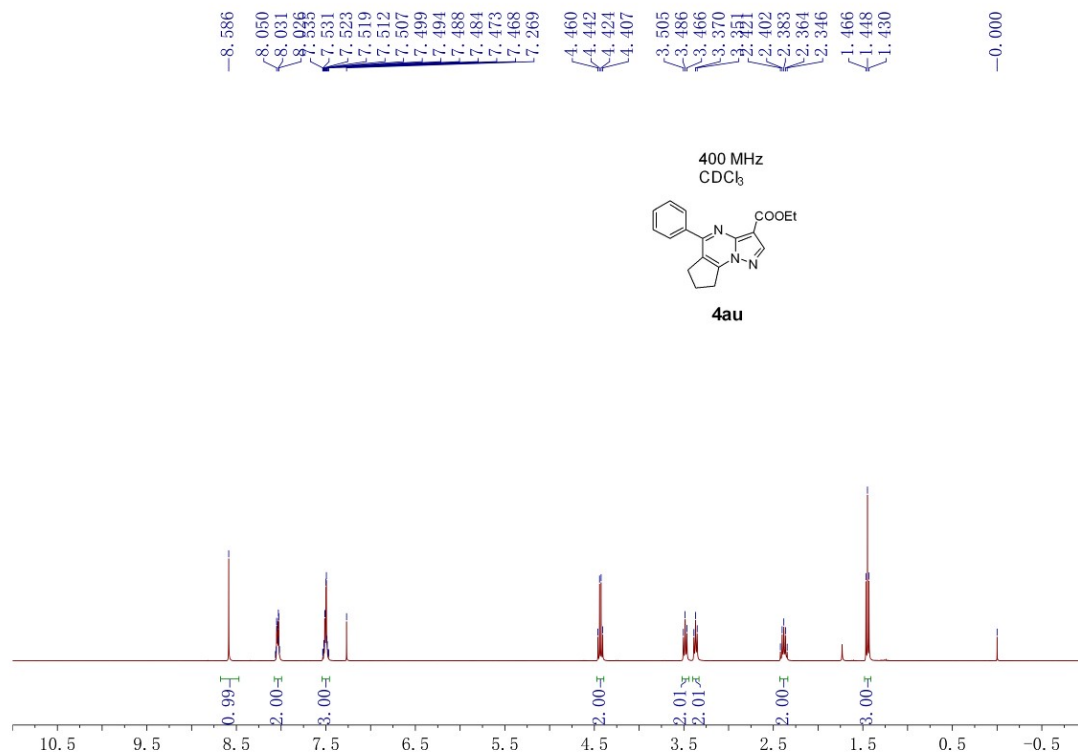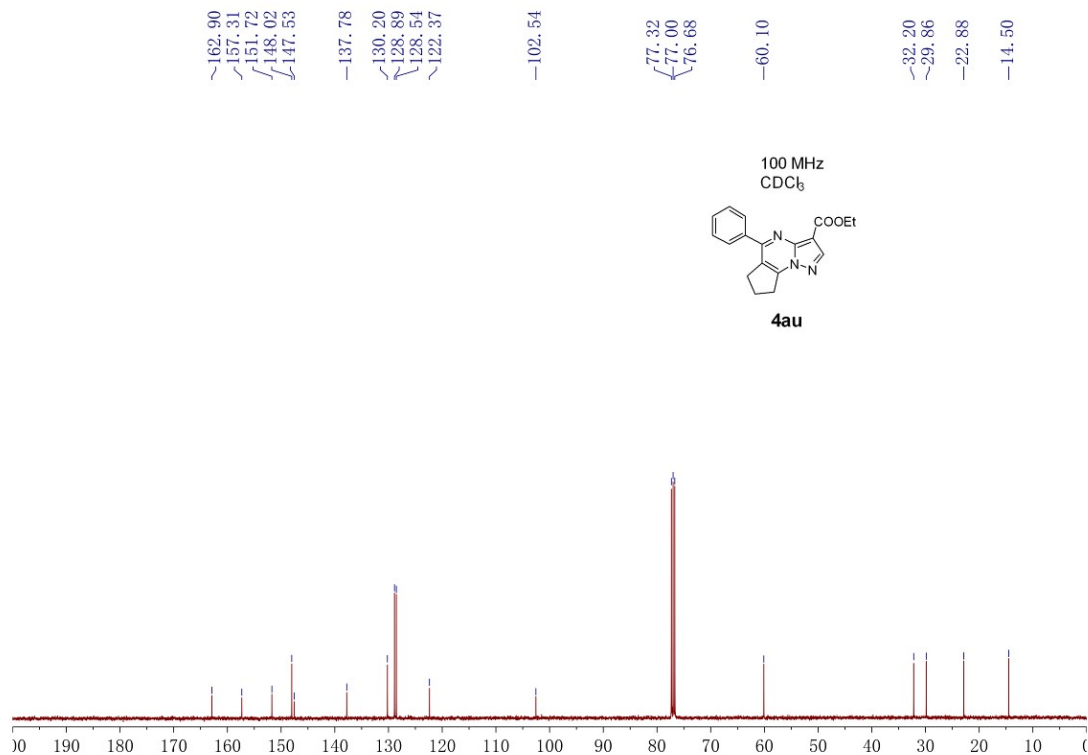



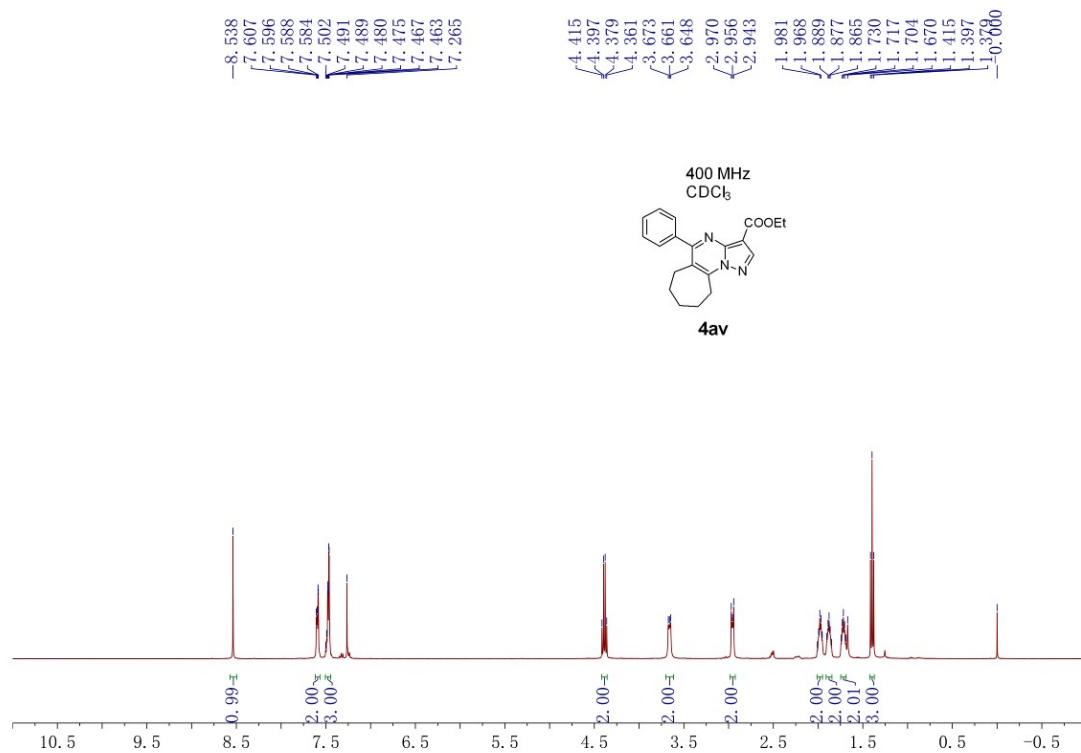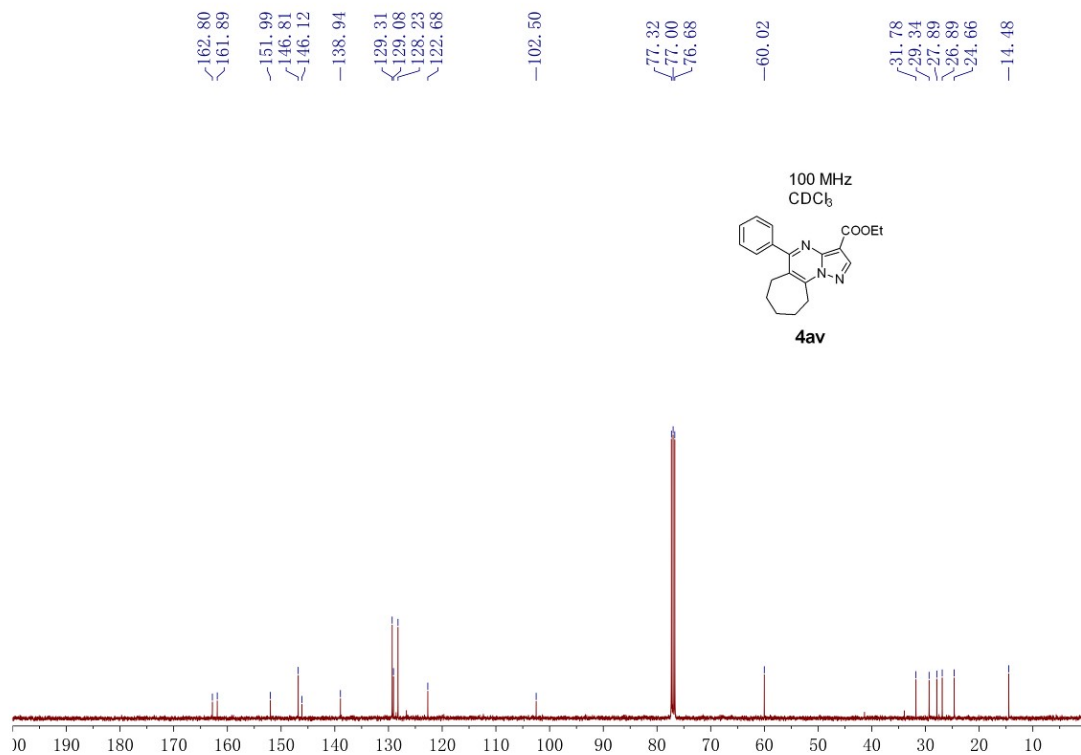

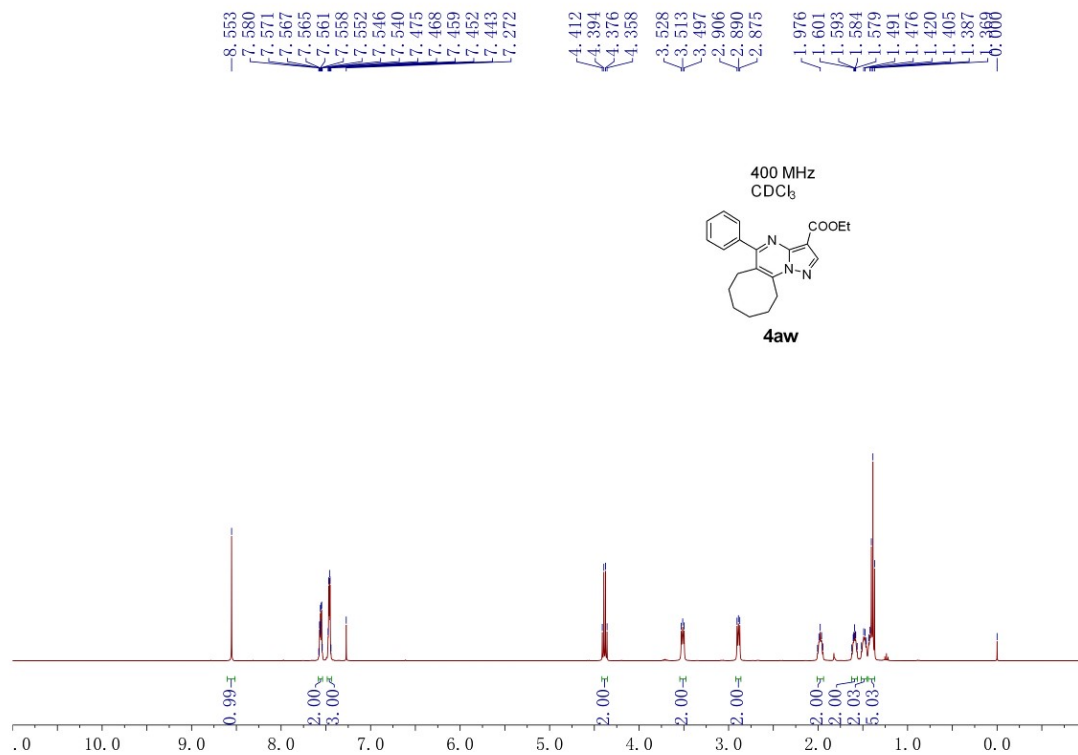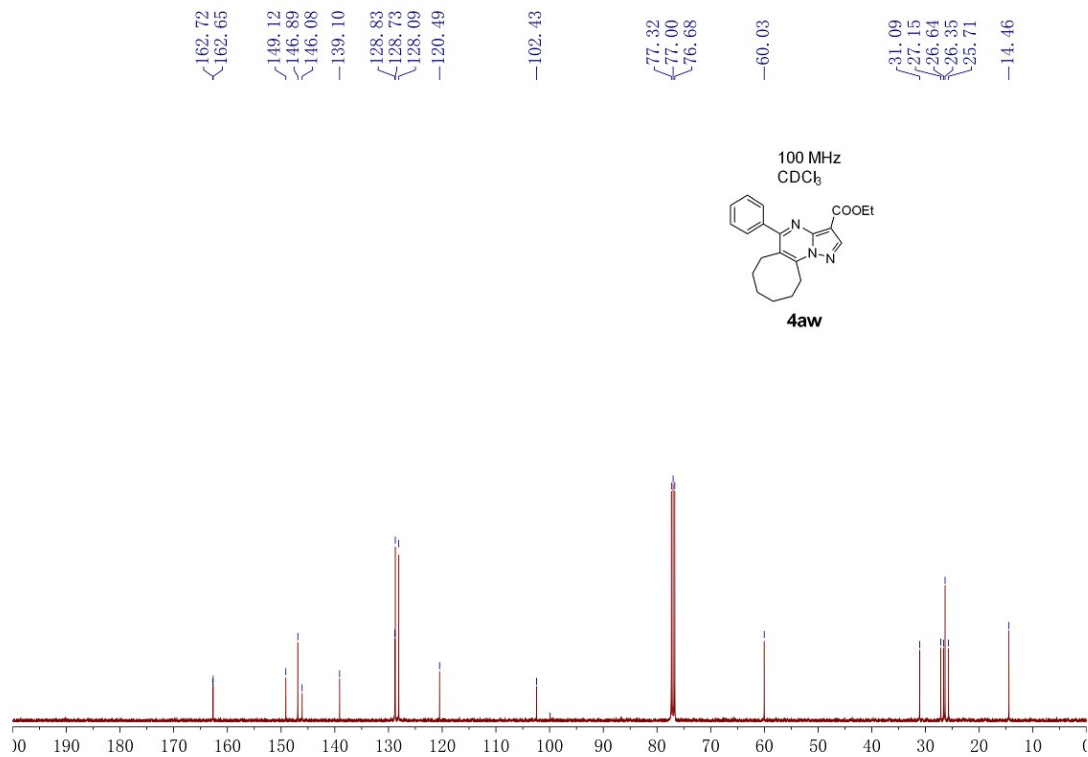

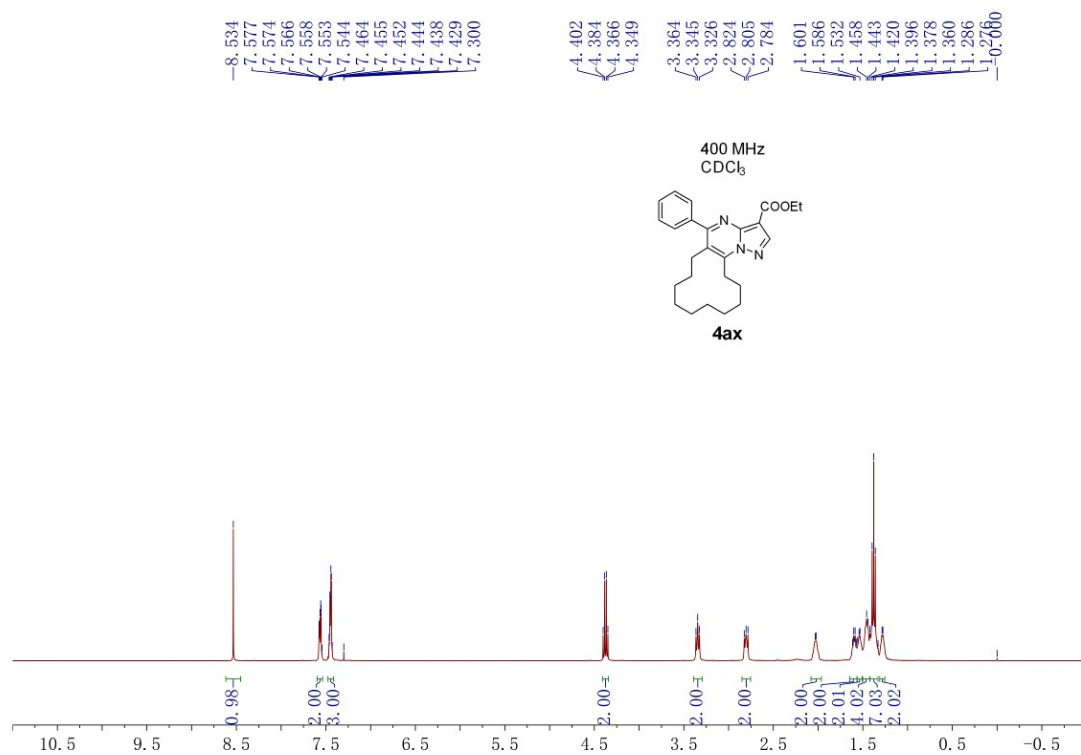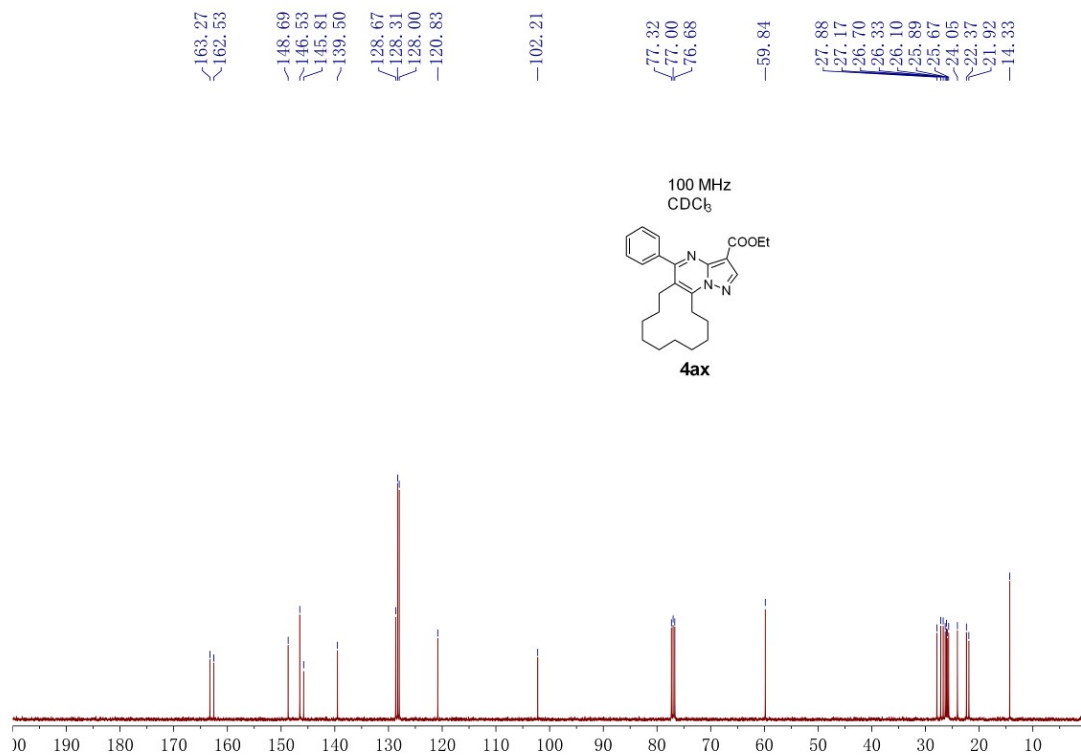

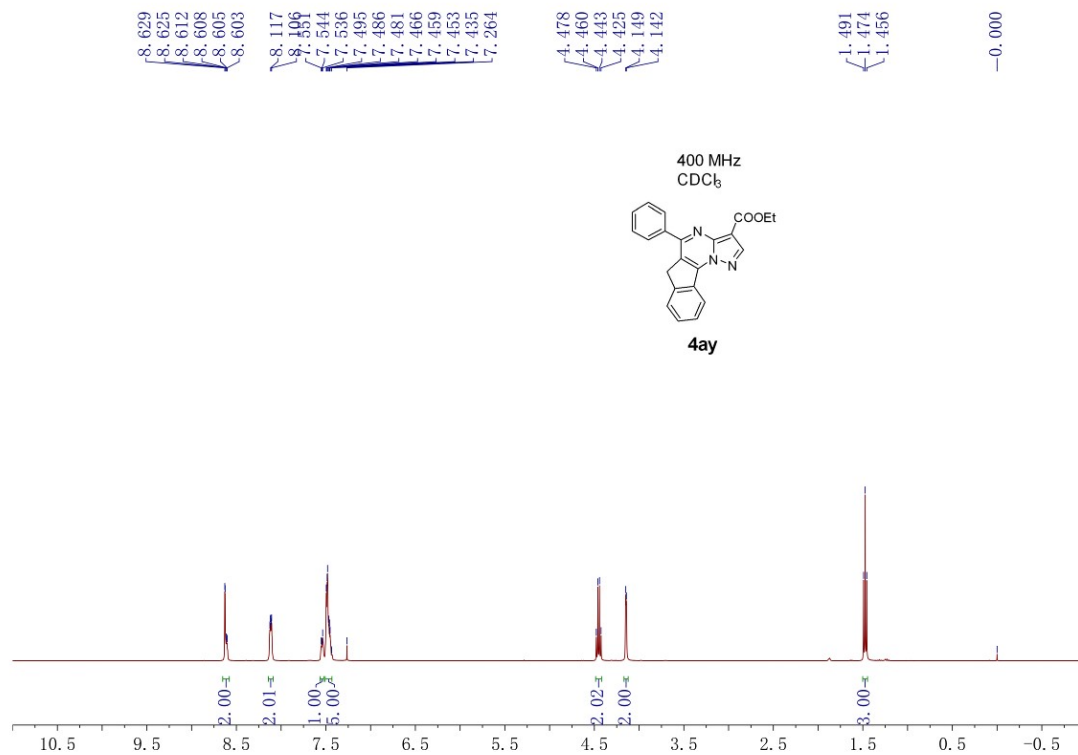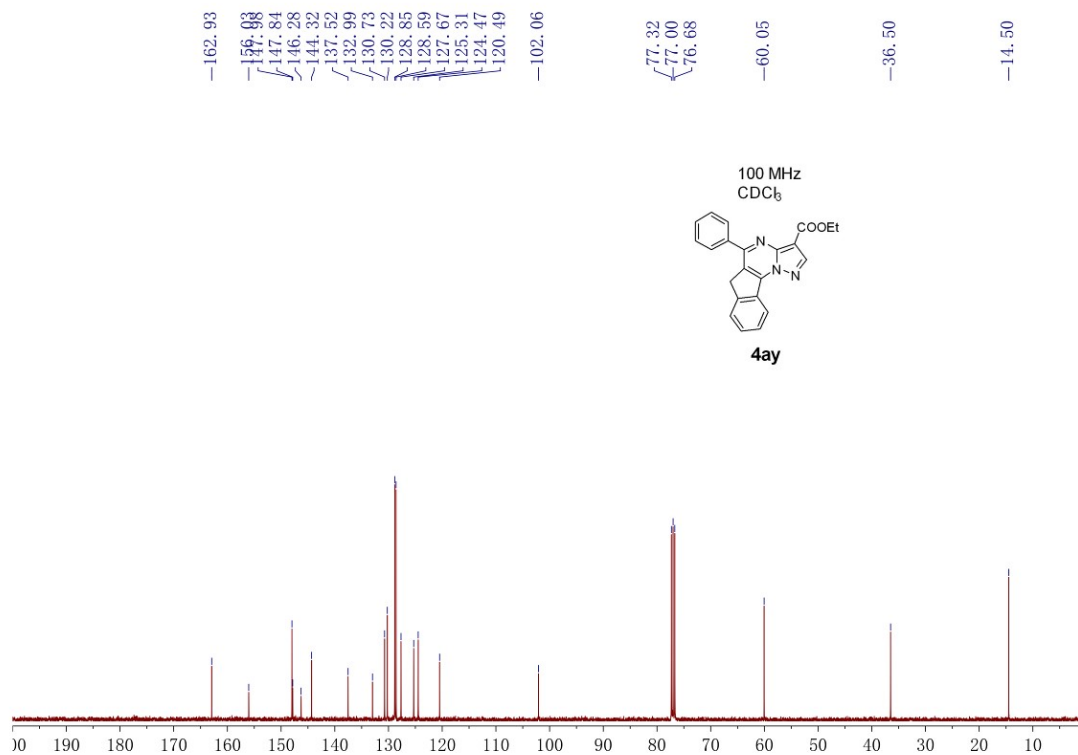

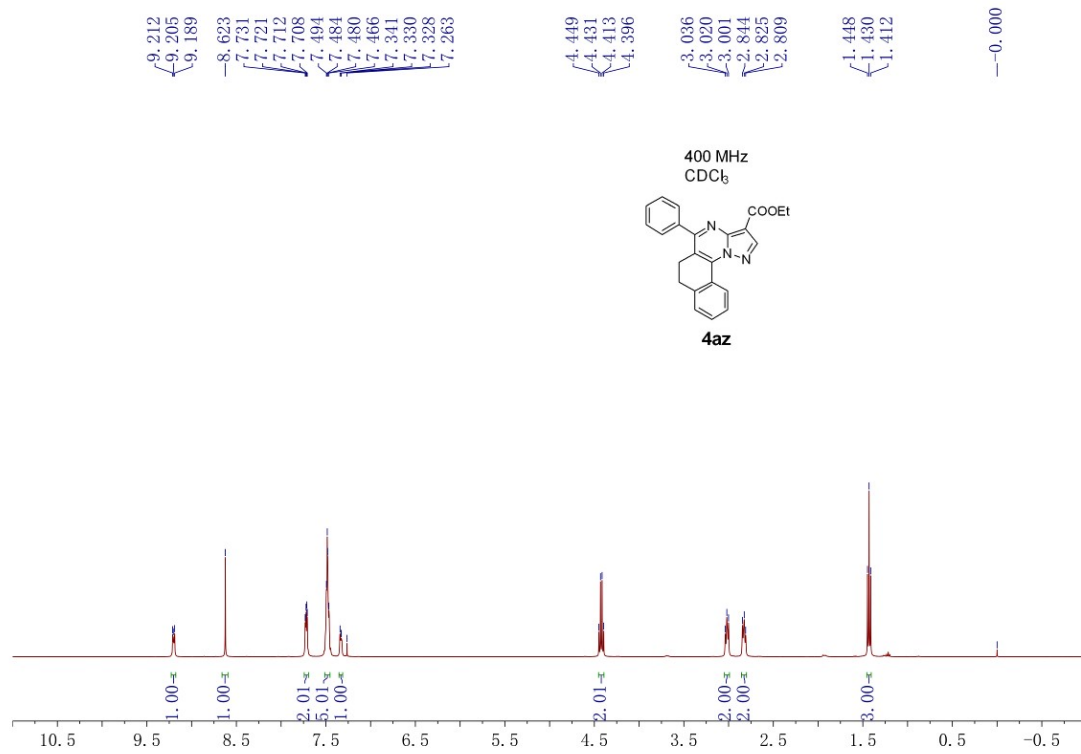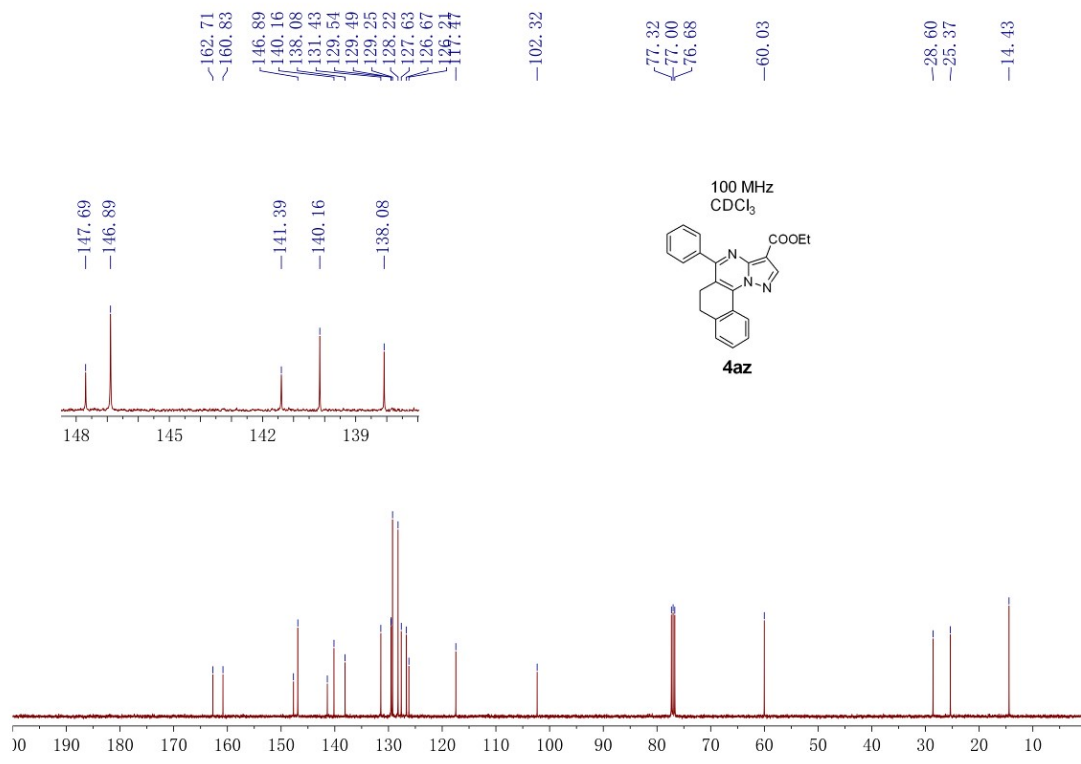

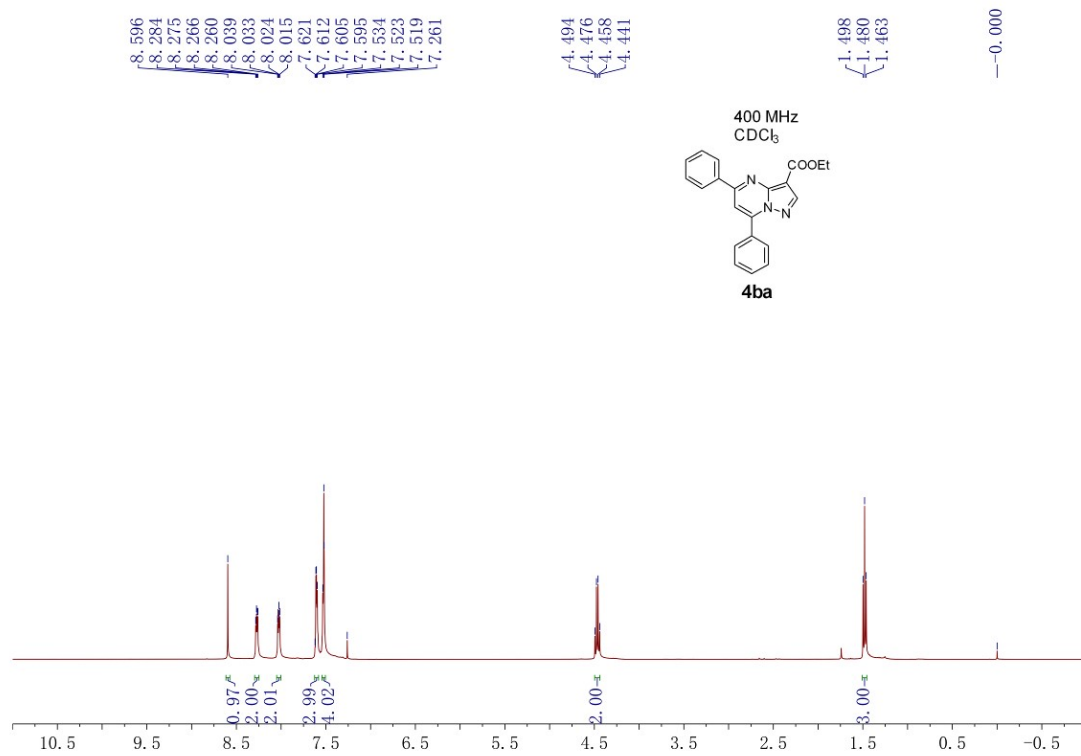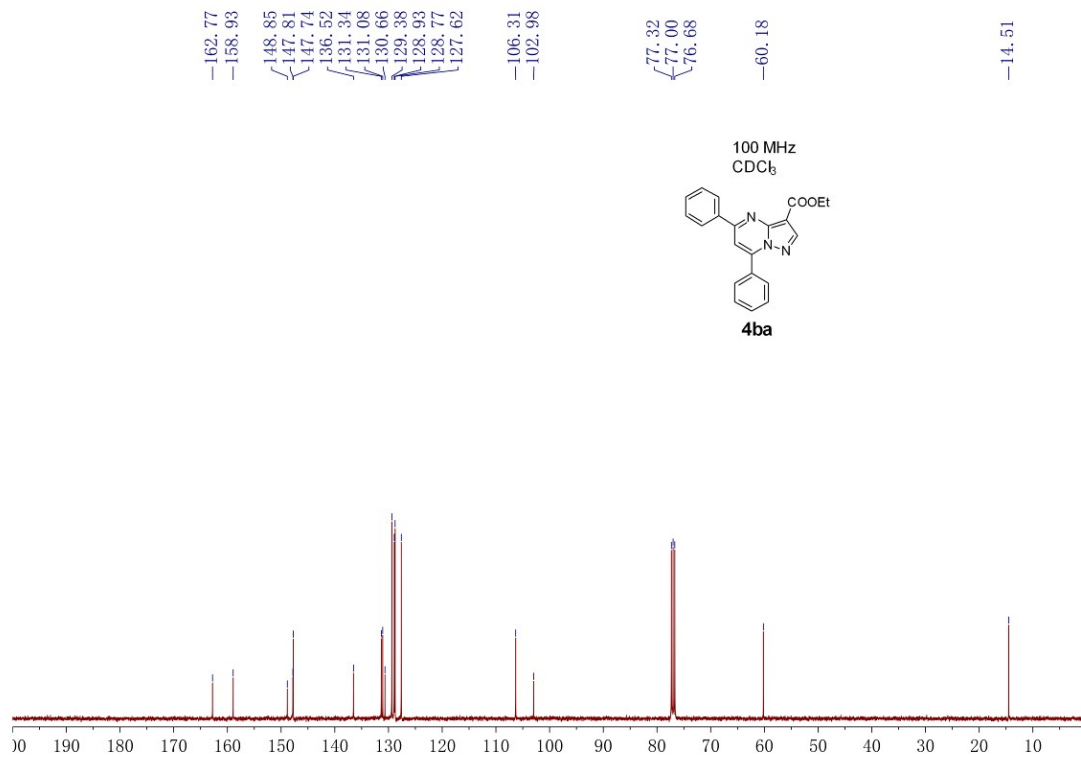

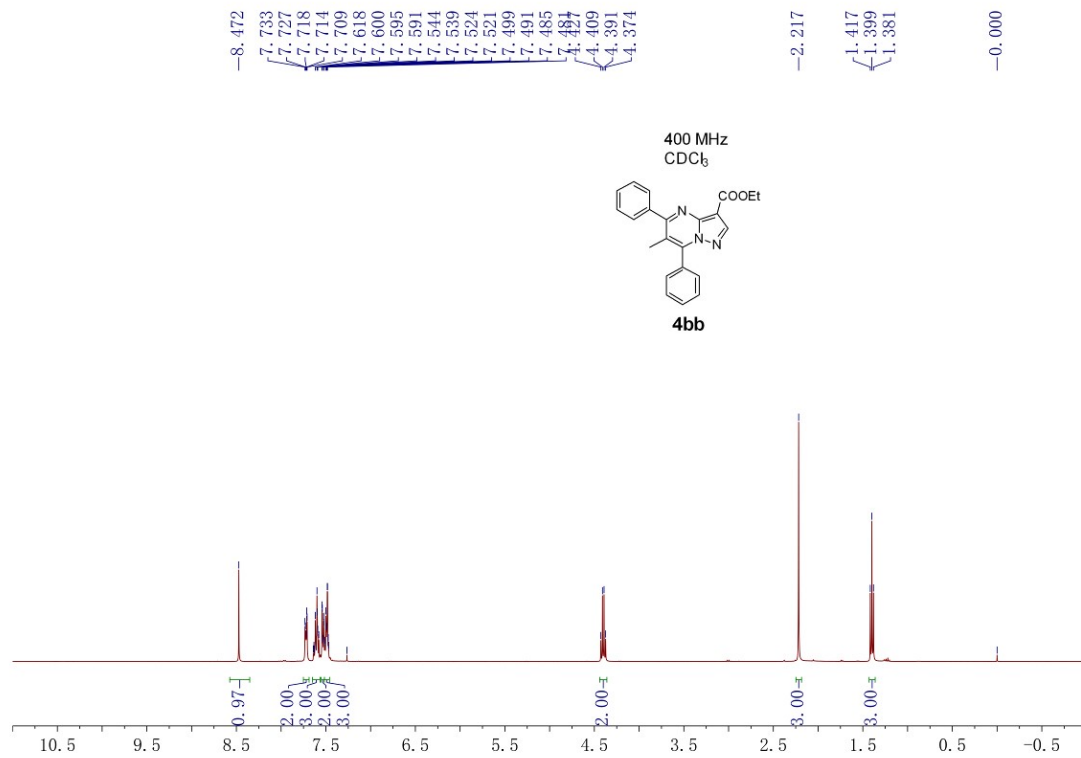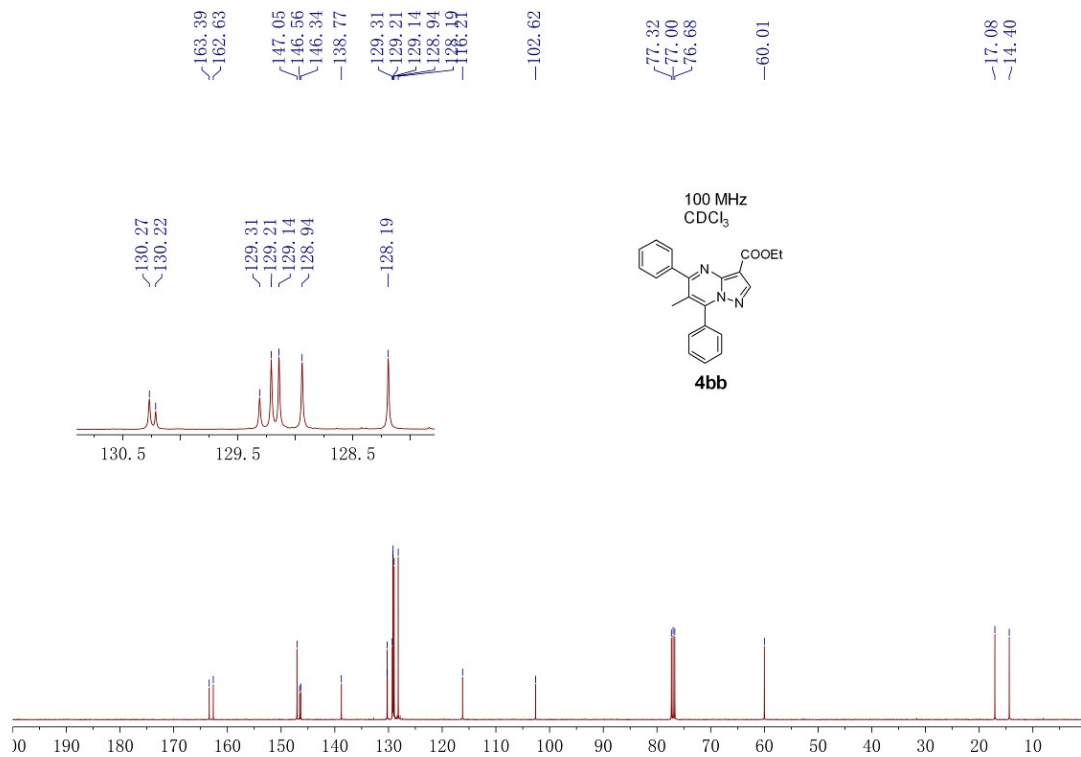

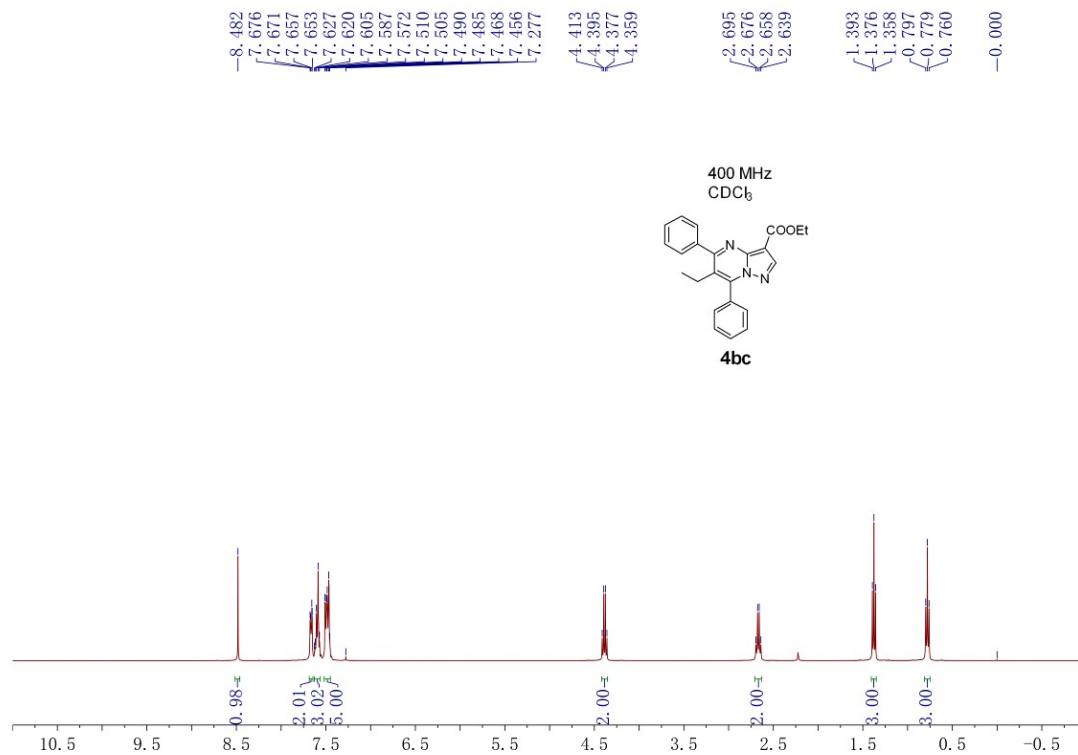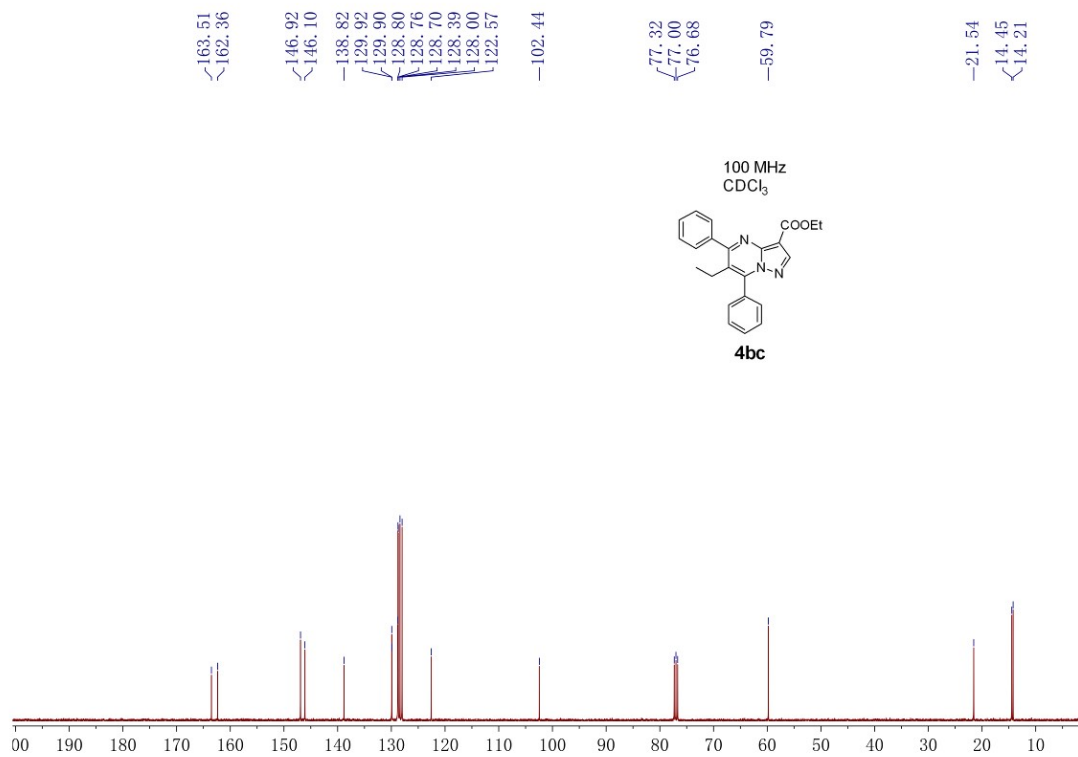



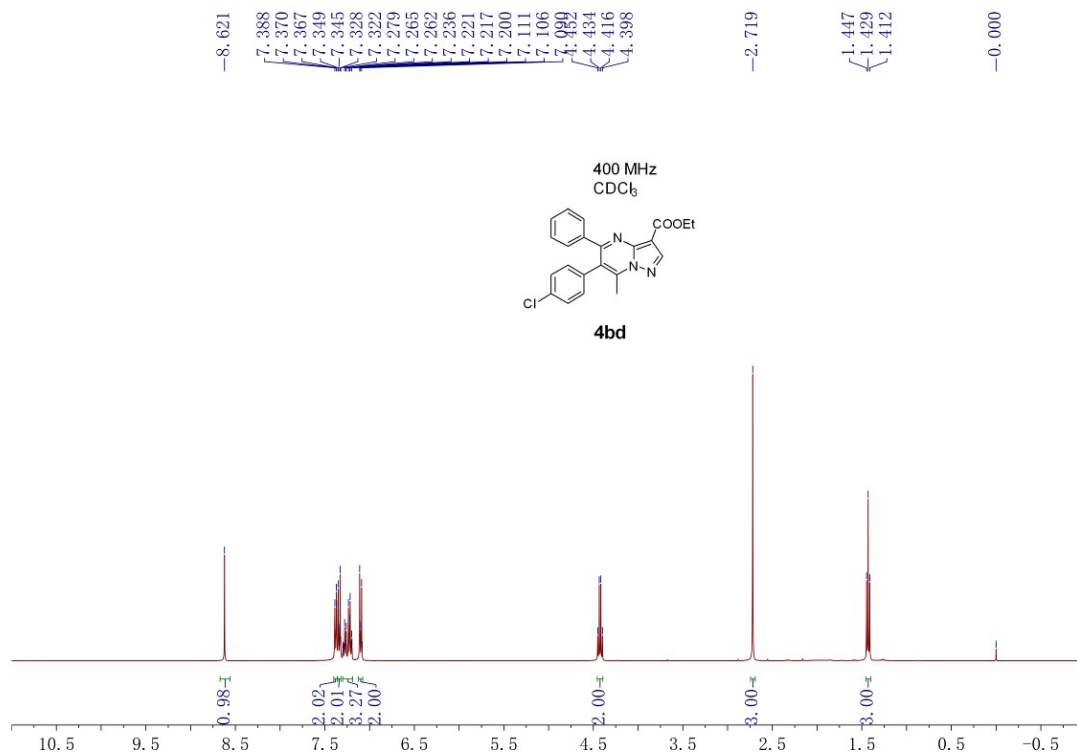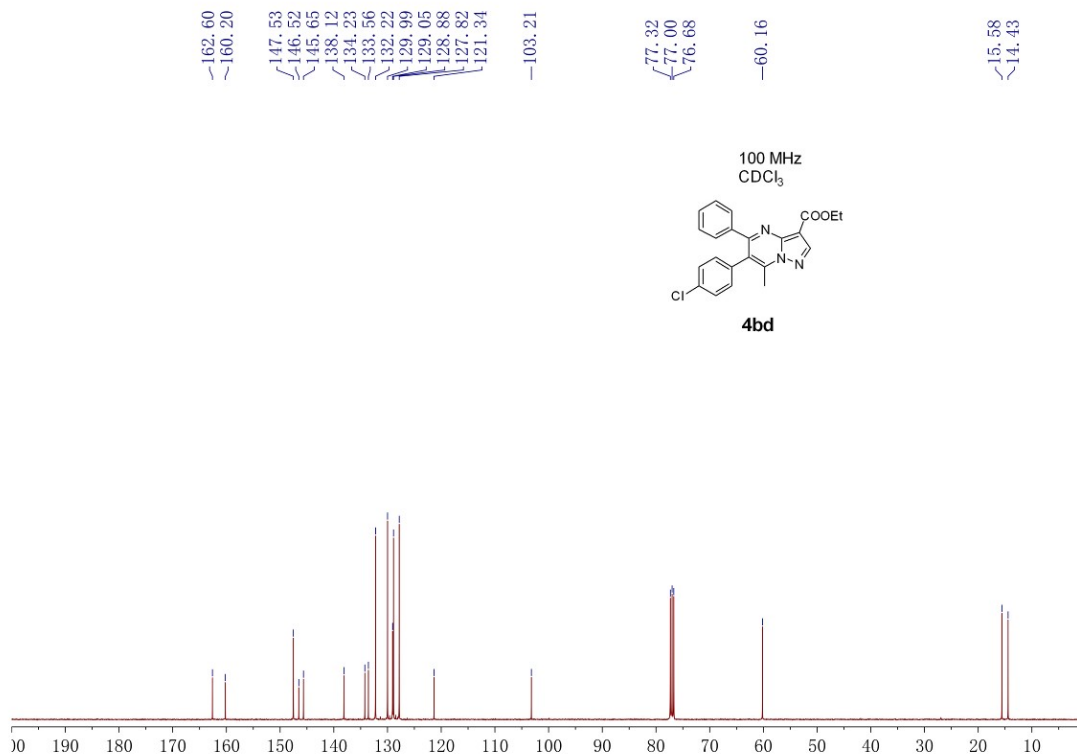

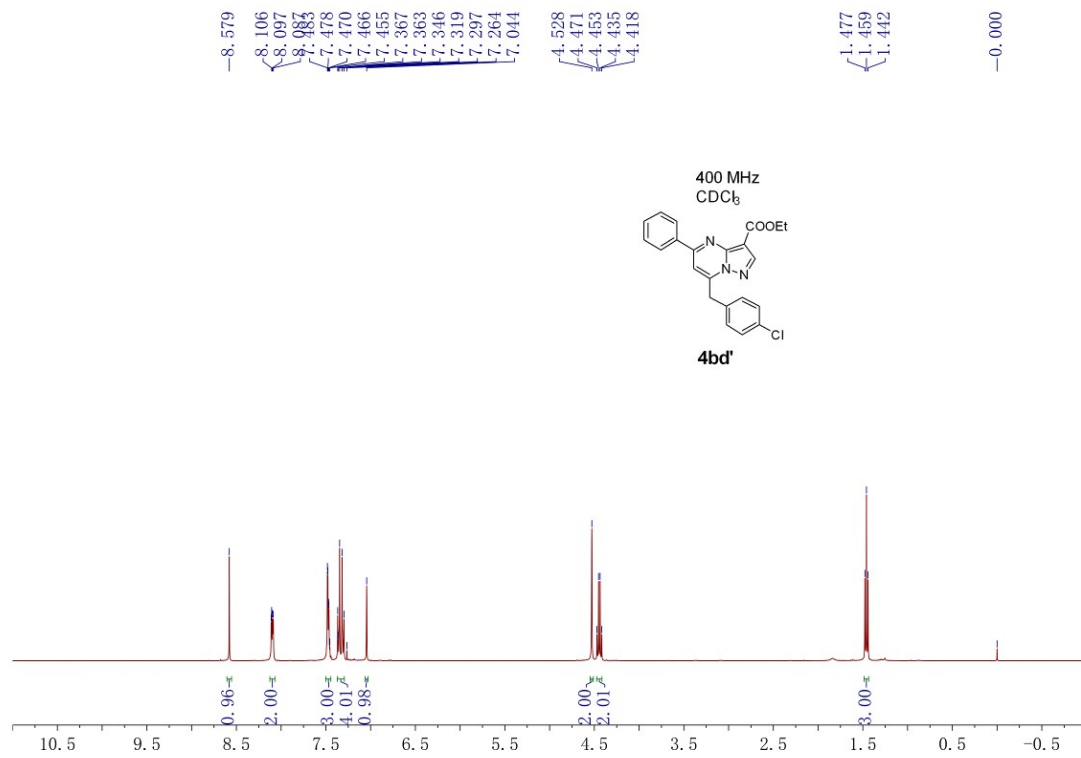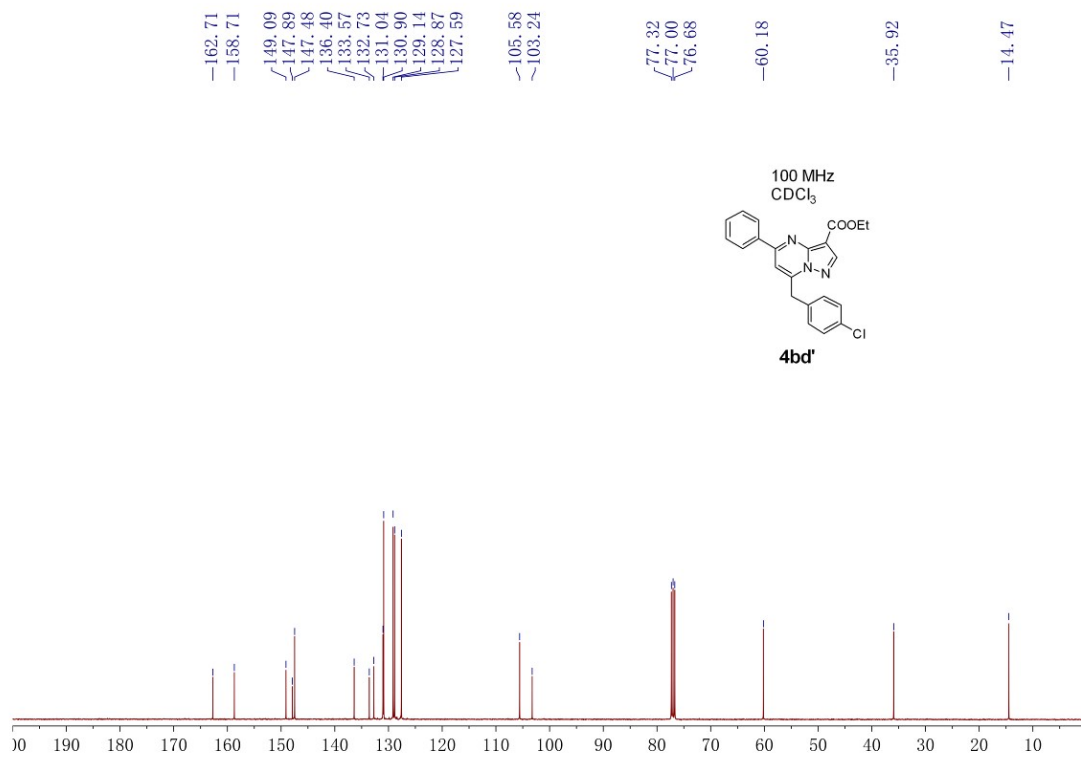

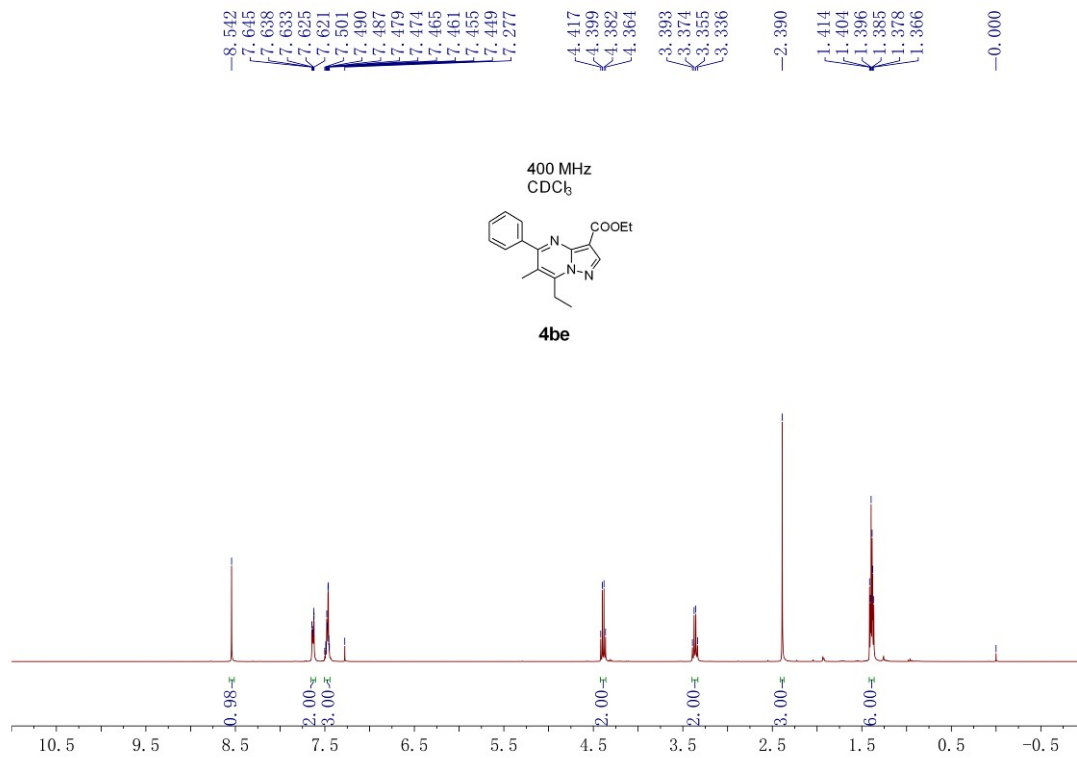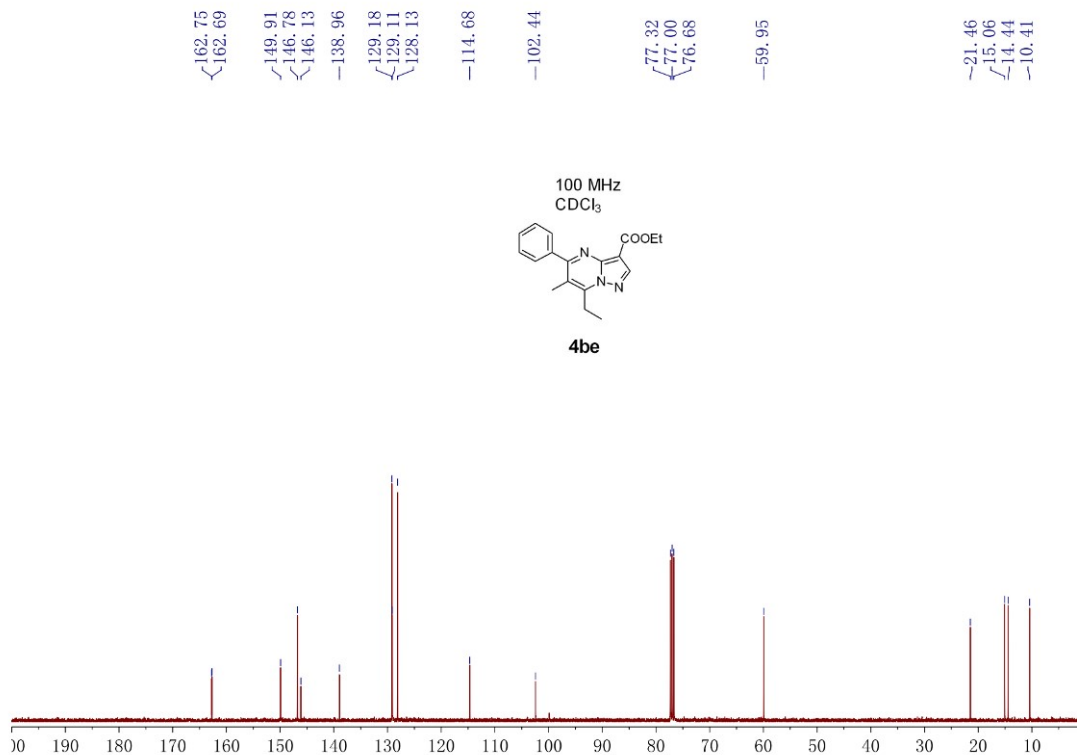

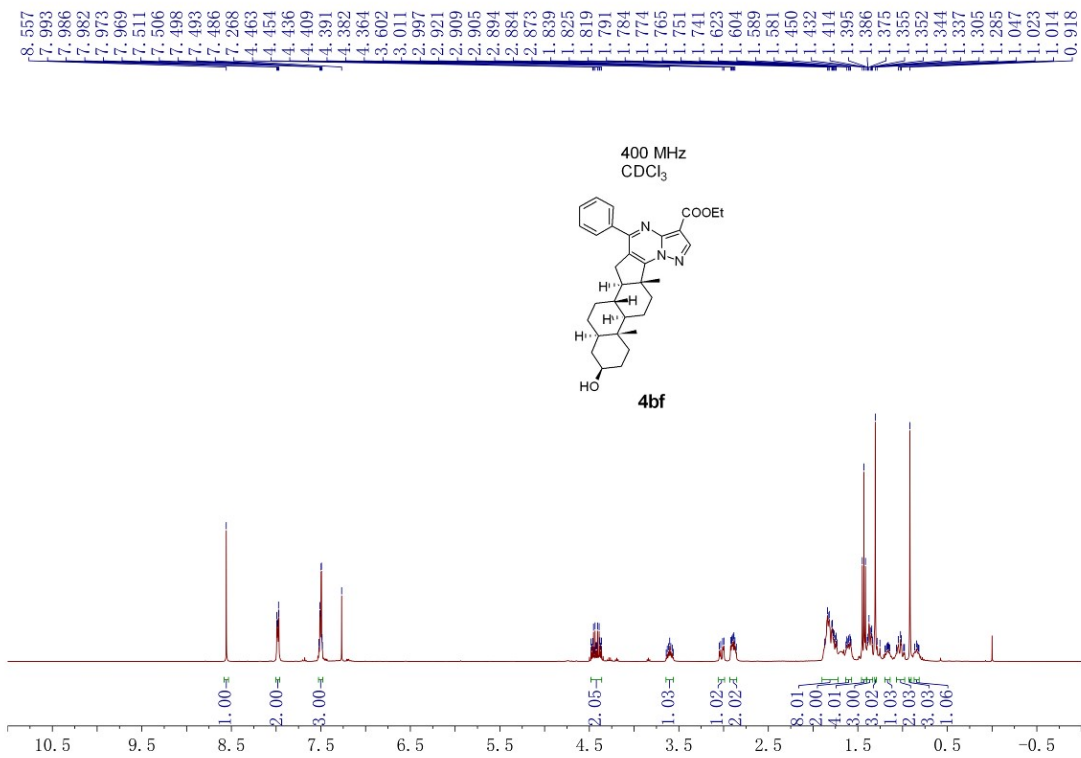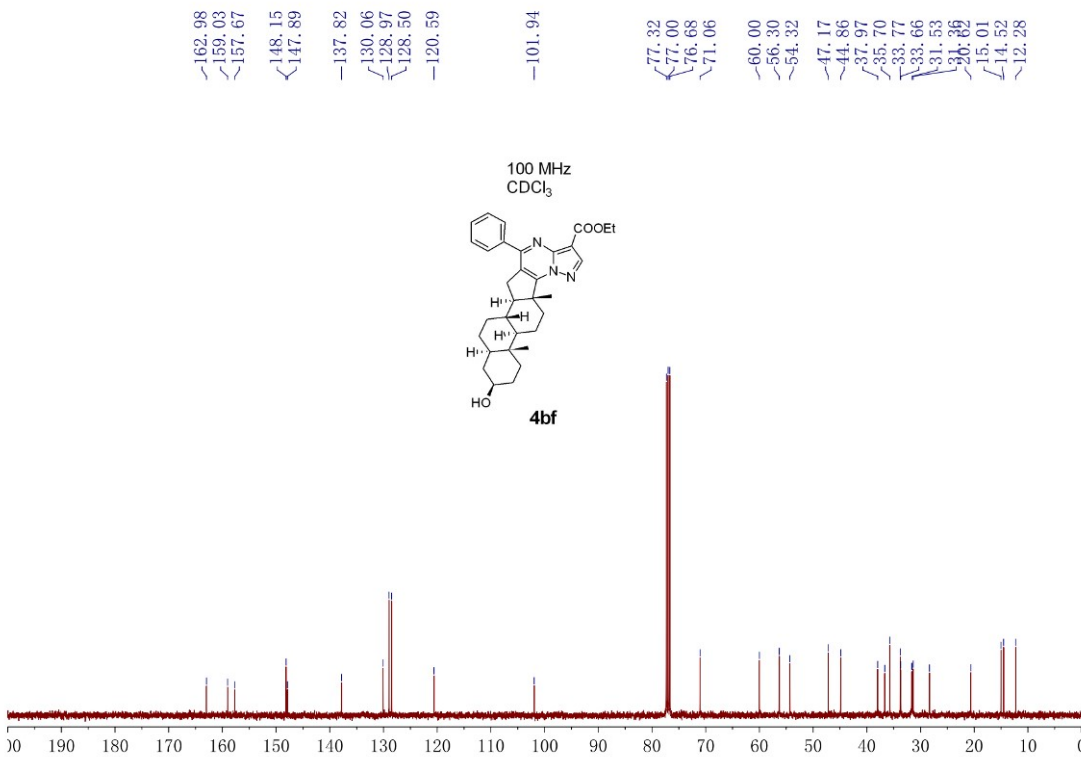

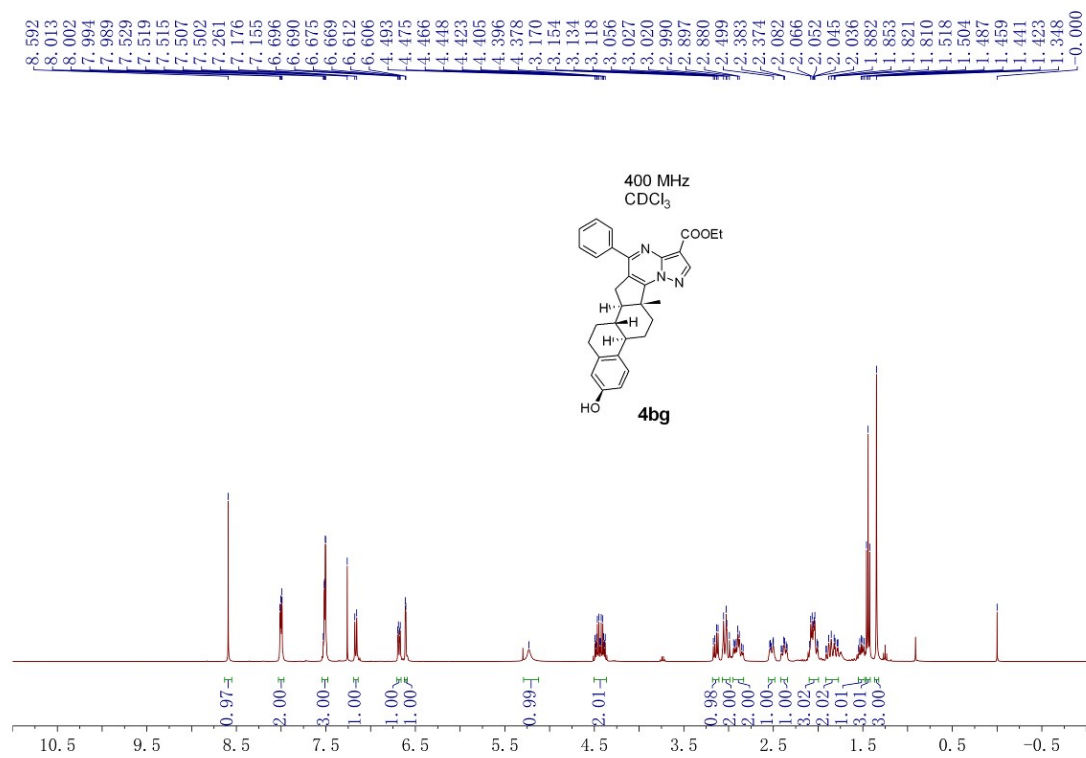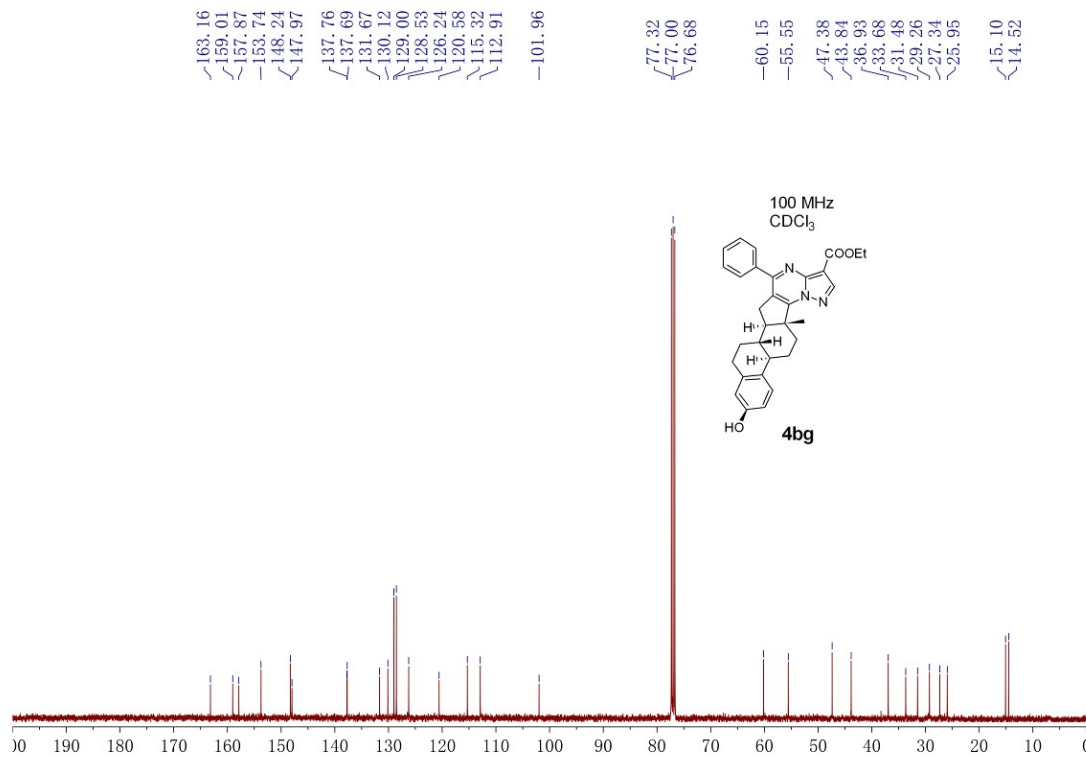

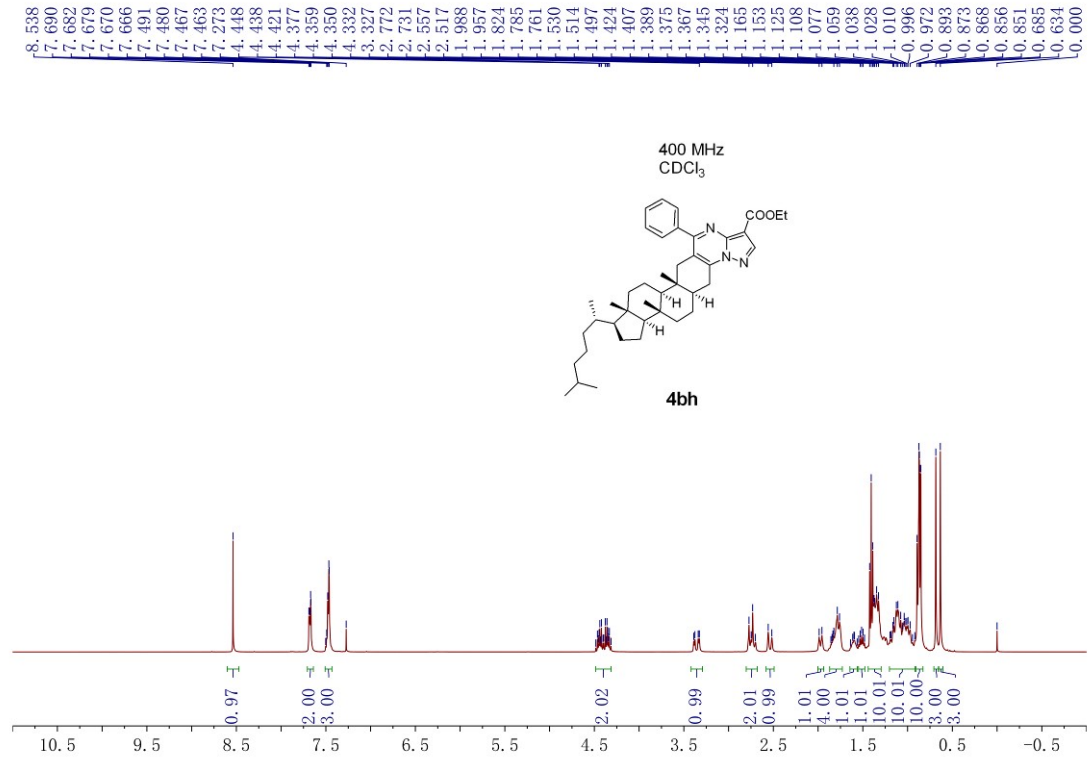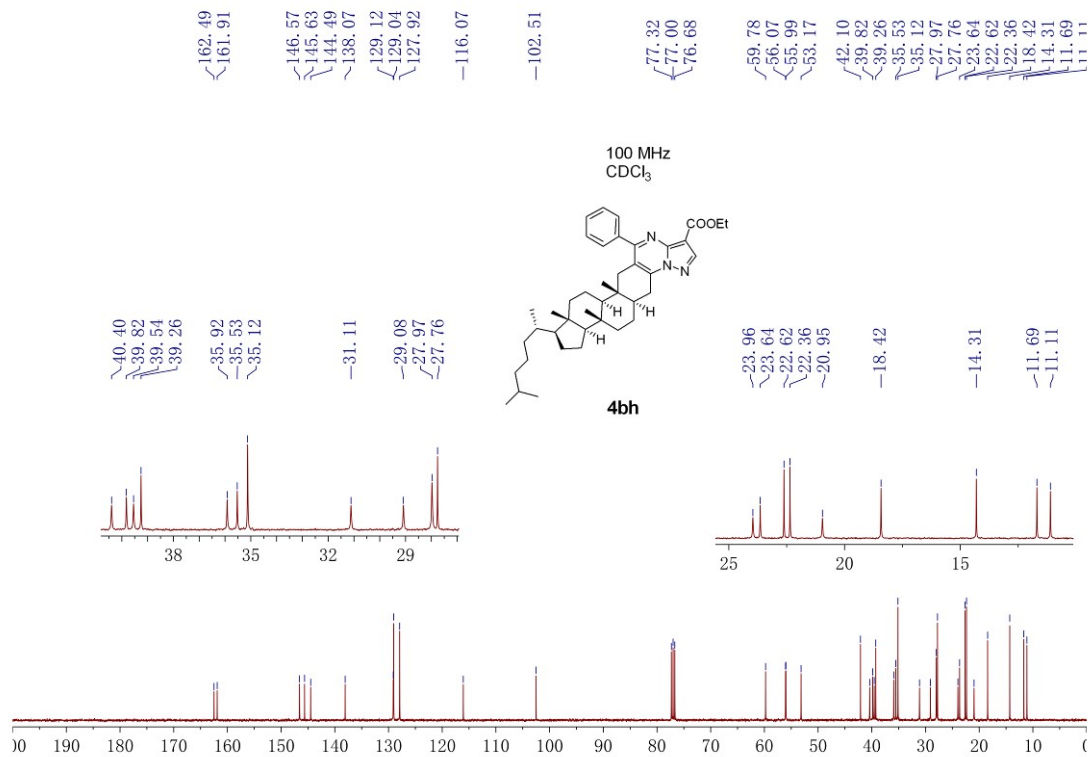

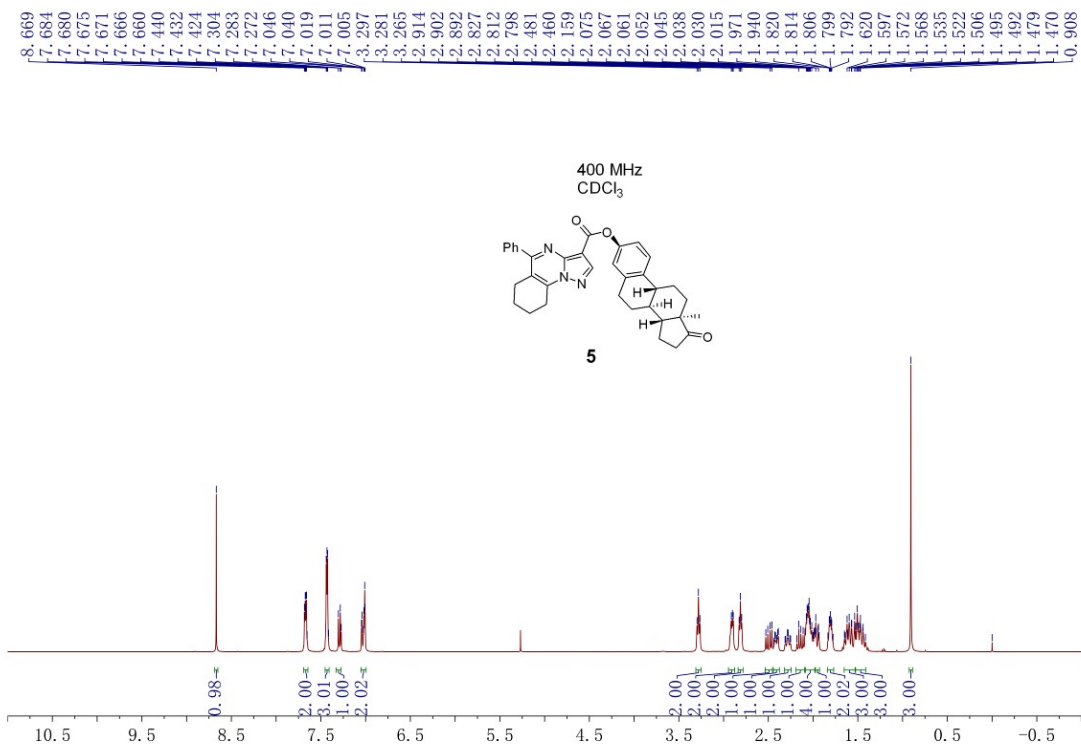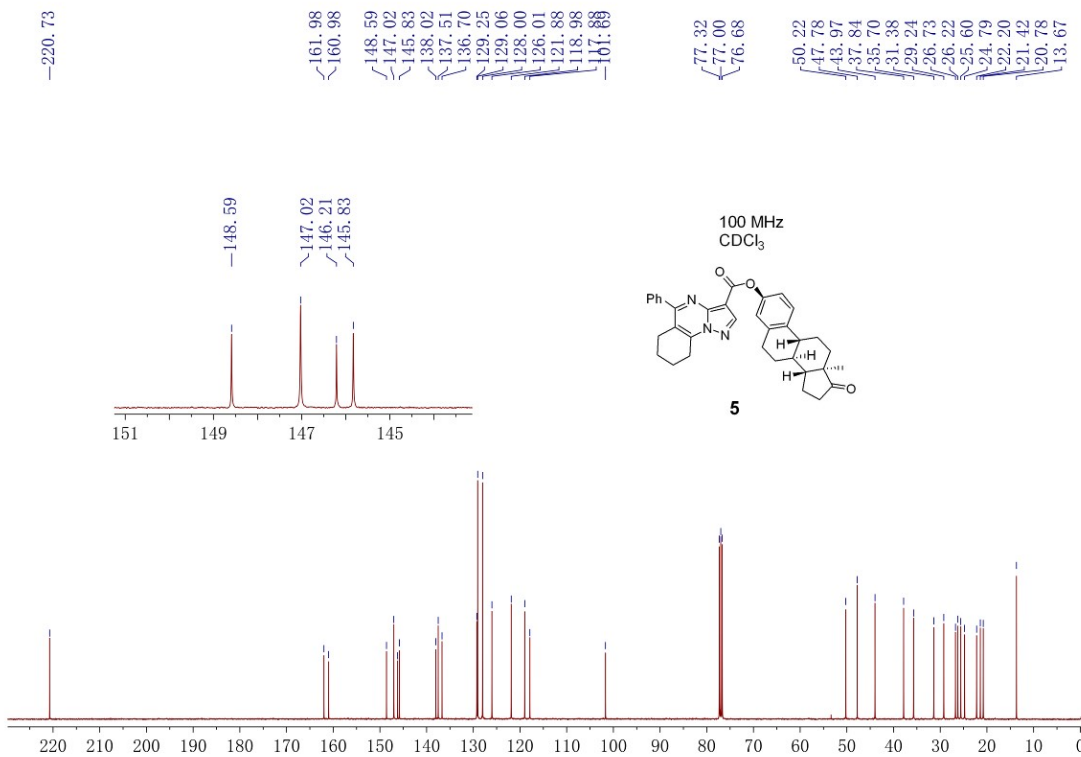

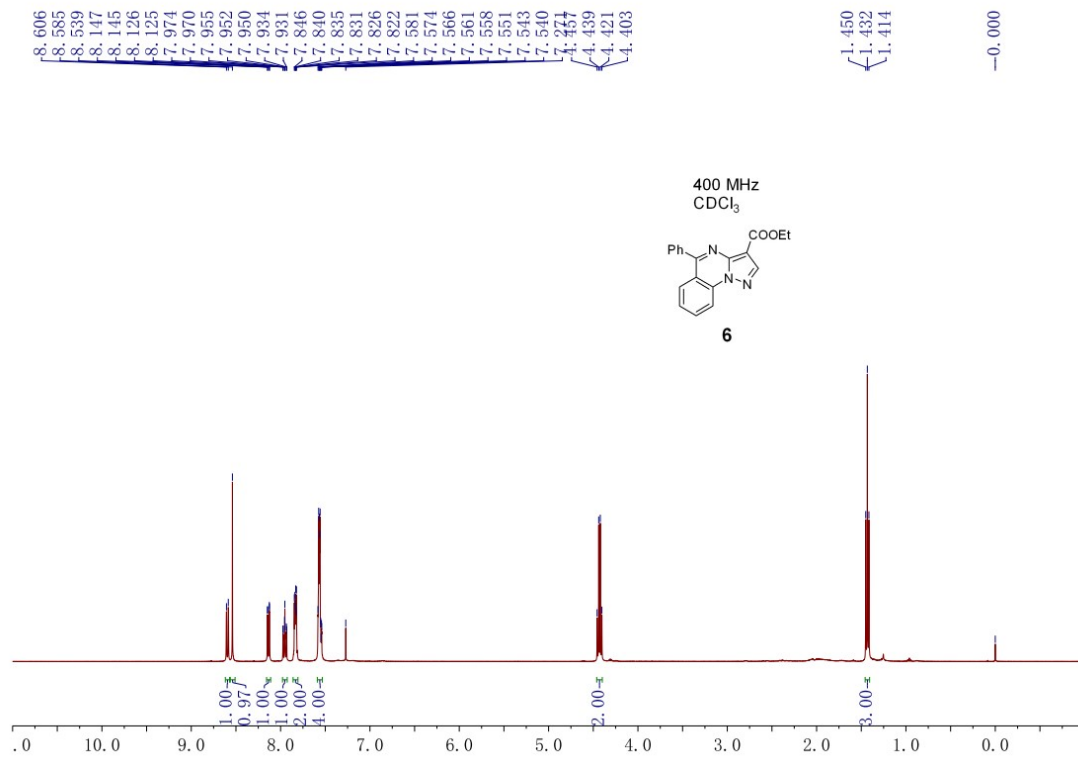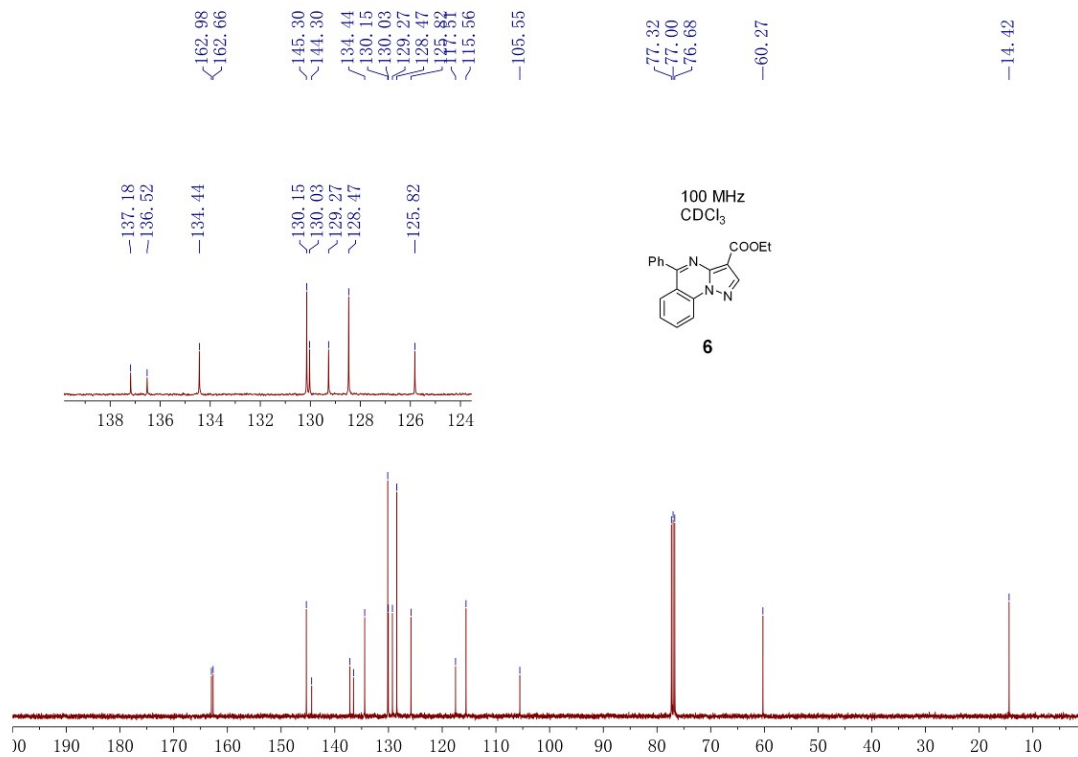



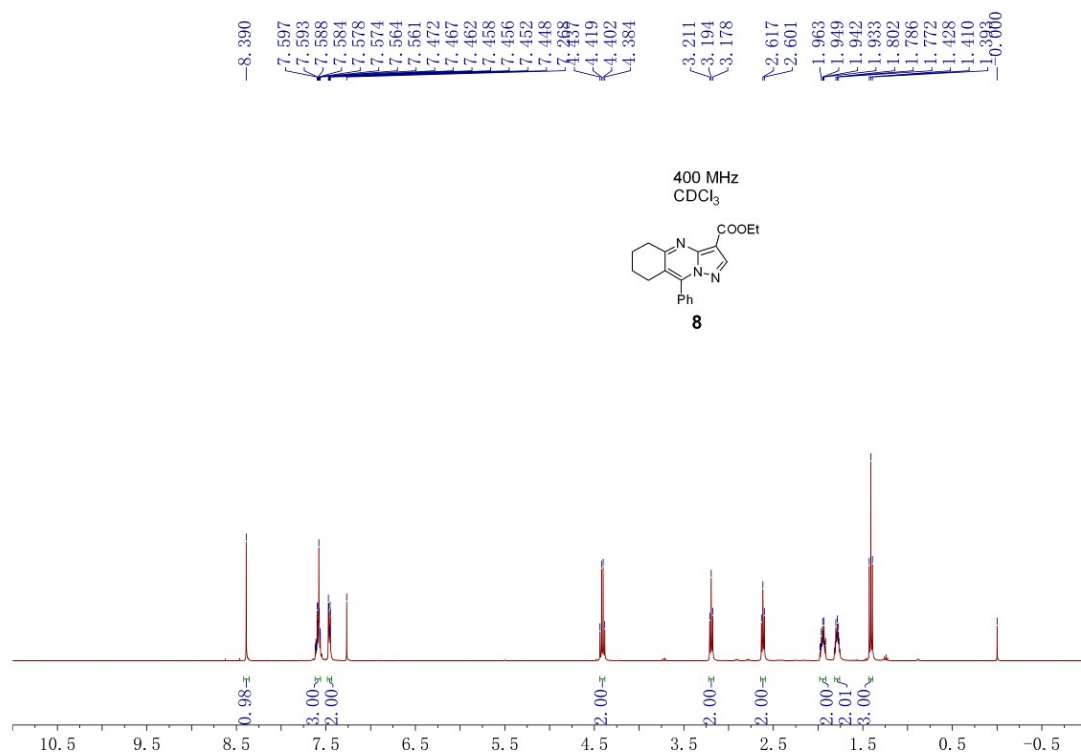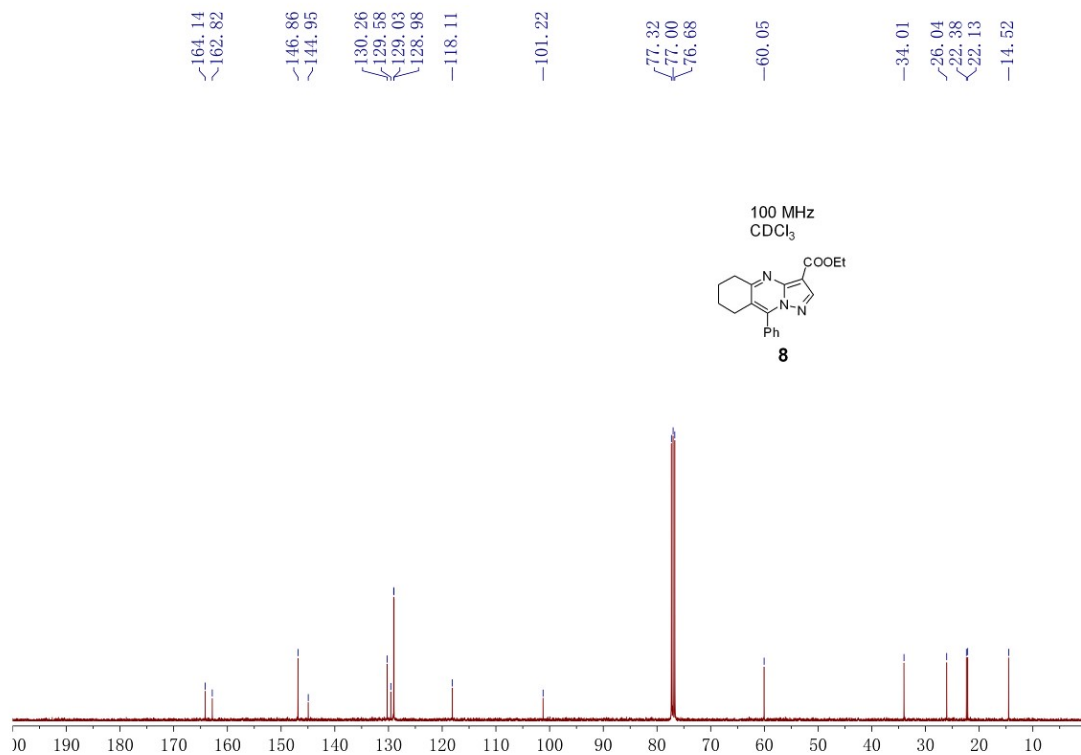

Supplement: d3nj03930g1.pdf [file d3nj03930g1.pdf]
